# Supplementary material for: Synthesis and functionalization of the six-vertex anionic amido-substituted silicon cluster [Si6{N(SiMe3)Ph}5]−
Source: Royal Society of Chemistry journal article supplement (doi:10.1039/d2dt03952d), 2023-01-01
Supplement: d2dt03952d1.pdf [file d2dt03952d1.pdf]

## Supporting Information for

### Synthesis and Functionalization of the Six-Vertex Anionic Amido-Substituted Silicon Cluster $[\text{Si}_6\{\text{N}(\text{SiMe}_3)\text{Ph}\}_5]^-$

---

*Westfälische Wilhelms-Universität Münster, Institut für Anorganische und Analytische Chemie, Corrensstraße 28-30, 48149 Münster,  
Email: lips@uni-muenster.de*

#### Table of content

1. General experimental procedures (S1)
2. Details for the synthesis and characterization of **2** (S2 – S10)
  - Details for the synthesis and characterization of **3** (S11 – S19)
  - Details for the synthesis and characterization of **4** (S20 – S28)
  - Details for the synthesis and characterization of **5** (S29 – S36)
  - Details for the synthesis and characterization of **6** (S37 – S45)
3. X-ray crystallographic data and collection parameters for **2 - 6** (S46 – S60)
4. DFT calculations of the anion in **3** (S61 – S78)
  - DFT-calculated NMR chemical shifts of **4 – 6** (S79 – S81)
  - DFT calculations of **7** (S82 – S84)
  - DFT calculations of **D**, **D<sub>iso</sub>**, **3<sub>opt</sub>**, **3<sub>iso</sub>**, **3'** and **3<sub>iso</sub>'** (S85 – S93)
5. References (S94)
6. Cartesian coordinates of all compounds (S95 – S118)

## 1. General experimental procedures

All reactions were performed with the use of modified Schlenk techniques with additional manipulations using a MBraun Glovebox. All solvents were dried over sodium benzophenone or CaH<sub>2</sub>, distilled and stored over 4 Å molecular sieves prior to use. Silicon tetrabromide, silicon tetrachloride and methyl iodide were purchased from Aldrich and used without further purification. [2.2.2]cryptant was purchased from Merck and was dried in vacuum for 16 h prior to use. The starting material Si<sub>6</sub>{N(SiMe<sub>3</sub>)Ph}<sub>6</sub> was prepared according to a literature procedure.<sup>[S1]</sup>

All NMR data were obtained on Bruker Avance I and III spectrometer and were referenced to the deuterated solvent (C<sub>6</sub>D<sub>6</sub>, THF-*d*<sub>8</sub>, PhMe-*d*<sub>8</sub>) according to an IUPAC recommendation. Additionally, the <sup>1</sup>H and <sup>13</sup>C NMR spectra were referenced internally to residual solvent resonances at 300 K. <sup>1</sup>H, <sup>13</sup>C and <sup>29</sup>Si NMR spectra were referenced to tetramethylsilane (TMS; δ = 0 ppm). <sup>15</sup>N NMR spectra were referenced to ammonia (NH<sub>3</sub>; δ = 0 ppm). Further explanation of the <sup>29</sup>Si NMR experiments: <sup>29</sup>Si DEPT 19.5 = <sup>29</sup>Si NMR measurement with Distortionless Enhancement Polarization Transfer method, pulse angle 19.5°, coupling to 9 protons as polarization source with coupling <sup>2</sup>J<sub>Si-H</sub> = 7 Hz; <sup>29</sup>Si{<sup>1</sup>H}IG = Inverse gated decoupled <sup>29</sup>Si proton decoupled NMR measurement; <sup>29</sup>Si{/} = <sup>29</sup>Si proton coupled NMR measurement. <sup>13</sup>C DEPT 135 = Distortionless Enhancement of Polarization Transfer using a 135 degree decoupler pulse. All <sup>13</sup>C NMR spectra were recorded proton decoupled. IR spectra were recorded using nujol oil and CsI plates on a Shimadzu IR PRESTIGE 21. UV-visible spectra were recorded as dilute THF or *n*-hexane solutions in 1 mL quartz cuvettes using an Agilent Cary 100 spectrometer. Mass spectrometry was performed with a Varian MAT 212 Micromass Quattro LC-Z device. CHN elemental analysis was done with a Vario EL III CHN Instrument. Melting points were measured in glass capillaries sealed under argon gas by using a Stuart Melting Point Apparatus SMP3 and are uncorrected.

## 2.1 Synthesis of $\text{K}[\text{Si}_6\{\text{N}(\text{SiMe}_3)\text{Ph}\}_5]$ (**2**)

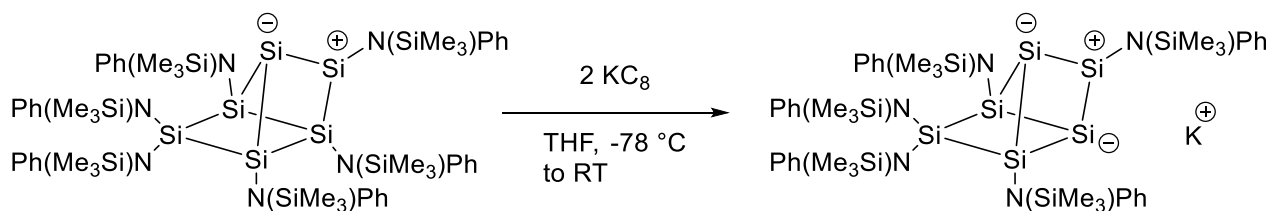

$\text{Si}_6\{\text{N}(\text{SiMe}_3)\text{Ph}\}_6$  (0.200 g, 0.17 mmol, 1.0 equiv.) was dissolved in THF (10 mL) and slowly added to a suspension of  $\text{KC}_8$  (0.047 g, 0.35 mmol, 2.0 equiv.) in THF (10 mL) at  $-78\text{ }^\circ\text{C}$ . The reaction mixture was warmed to room temperature over 12 h to obtain an orange solution. Volatile components were removed in vacuo to obtain an orange solid. The crude orange product was extracted in benzene 6 mL to obtain  $\text{K}[\text{Si}_6\{\text{N}(\text{SiMe}_3)\text{Ph}\}_5]$  (**2**) (0.107 g, 0.10 mmol, 61%) as a pale yellow solid that was isolated by filtration. Single crystals of **2** were obtained from a saturated THF/*n*-hexane solution at room temperature.

$^1\text{H-NMR}$  (THF- $d_8$ , 300 K, 400 MHz):  $\delta(\text{ppm}) = 7.23 - 7.16$  (4H, m);  $7.07 - 6.88$  (13H, m);  $6.83 - 6.74$  (8H, m);  $0.43$  (9H, s);  $0.06$  (18H, s);  $-0.01$  (18H, s).

$^{13}\text{C-NMR}$  (THF- $d_8$ , 300 K, 100 MHz):  $\delta(\text{ppm}) = 153.9$ ;  $150.0$ ;  $147.5$ ;  $132.6$ ;  $131.4$ ;  $131.2$ ;  $128.5$ ;  $128.4$ ;  $128.1$ ;  $123.0$ ;  $122.5$ ;  $122.0$ ;  $3.9$ ;  $3.7$ ;  $3.3$ .

$^{15}\text{N}, ^1\text{H-HMBC-NMR}$  (THF- $d_8$ , 300 K, 41 MHz):  $\delta(\text{ppm}) = 144$ ;  $89$ ;  $40$ .

$^{29}\text{Si}(\text{DEPT } 19.5)\text{-NMR}$  (THF- $d_8$ , 300 K, 80 MHz):  $\delta(\text{ppm}) = 4.7$ ;  $3.8$ ;  $0.9$ .

$^{29}\text{Si}\{^1\text{H}\}\text{IG-NMR}$  (THF- $d_8$ , 300 K, 80 MHz):  $\delta(\text{ppm}) = 164.0$ ;  $68.5$ ;  $44.4$ ;  $-44.9$ .

**IR** (KBr pellet,  $\tilde{\nu}/\text{cm}^{-1}$  (intensity)) =  $523(\text{m})$ ,  $608(\text{vw})$ ,  $660(\text{vw})$ ,  $700(\text{m})$ ,  $754(\text{w})$ ,  $837(\text{vs})$ ,  $874(\text{vs})$ ,  $937(\text{vs})$ ,  $1028(\text{vw})$ ,  $1071(\text{vw})$ ,  $116$  (vw),  $1209(\text{s})$ ,  $1246(\text{s})$ ,  $1404(\text{vw})$ ,  $1443(\text{vw})$ ,  $1481(\text{vs})$ ,  $1587(\text{m})$ ,  $2891(\text{vw})$ ,  $2951(\text{w})$ ,  $3053(\text{vw})$ .

**ESI-MS**:  $m/z = 988.31$  [ $\text{Si}_6\{\text{N}(\text{SiMe}_3)\text{Ph}\}_5$ ] $^-$ ,  $1038.31$  [ $\text{Si}_6\{\text{N}(\text{SiMe}_3)\text{Ph}\}_5(\text{OH})_2\text{O}$ ] $^-$ .

**UV-Vis**: (THF,  $c = 3.0 \cdot 10^{-4}$  mol/L,  $\epsilon/\text{L} \cdot \text{mol}^{-1} \cdot \text{cm}^{-1}$ ):  $\lambda = 243$  nm (2747),  $293$  nm (854).

**Melting point**: Decomposition at  $215\text{ }^\circ\text{C}$ .

| <b>Elemental Analysis</b> for $\text{C}_{45}\text{H}_{70}\text{KN}_5\text{Si}_{11}$ : | H    | C     | N    |
|---------------------------------------------------------------------------------------|------|-------|------|
| calculated:                                                                           | 6.86 | 52.52 | 6.81 |
| found:                                                                                | 6.80 | 50.95 | 6.33 |

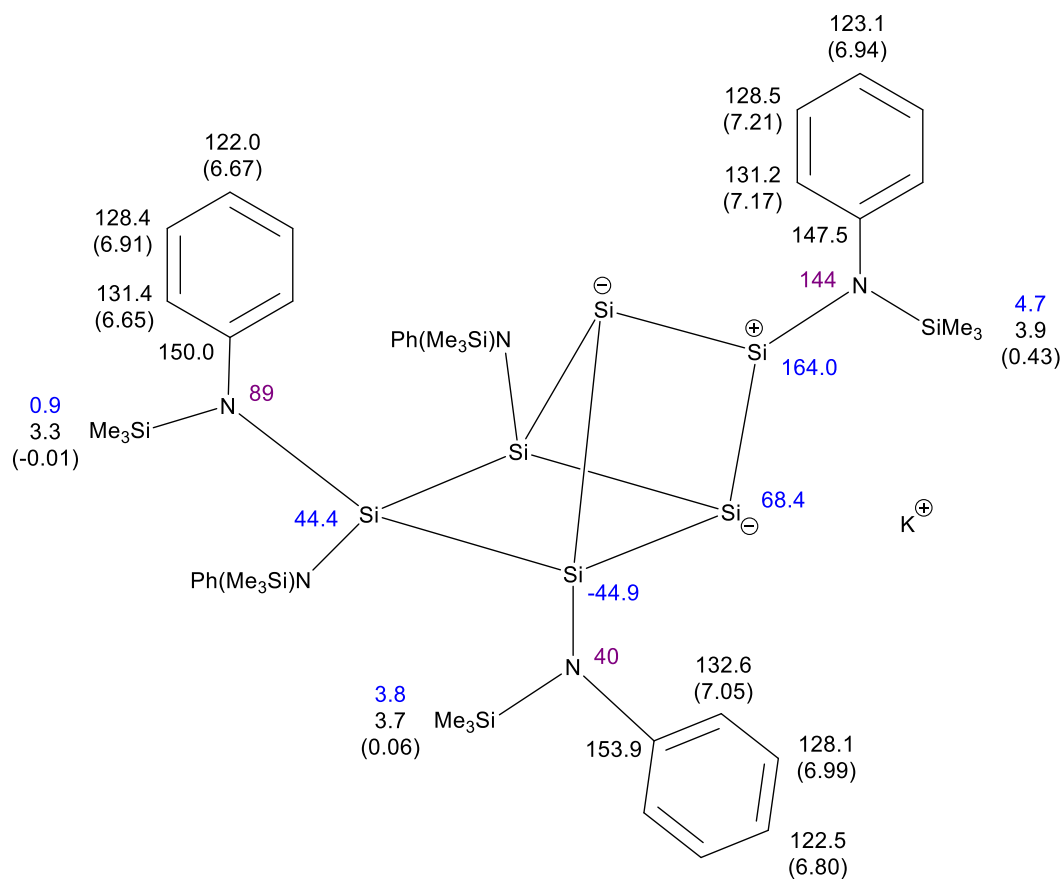

**Figure S1.** Assignment of chemical shifts to  $\text{K}[\text{Si}_6\{\text{N}(\text{SiMe}_3)\text{Ph}\}_5]$ ,  $^1\text{H}$  (in brackets),  $^{13}\text{C}$  (black),  $^{15}\text{N}$  (violet),  $^{29}\text{Si}$  (blue).

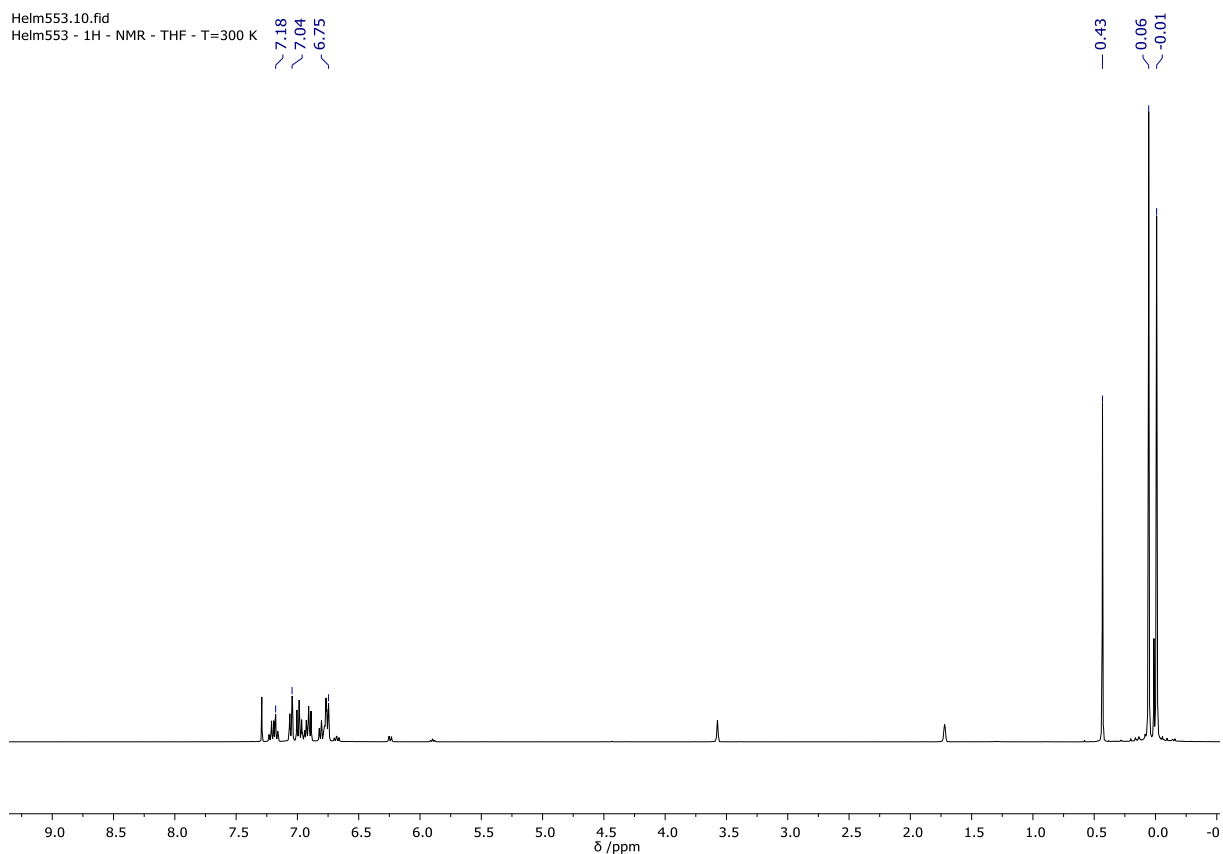

**Figure S2.**  $^1\text{H}$ -NMR spectrum (THF- $d_8$ , 300 K, 400 MHz) of  $\text{K}[\text{Si}_6\{\text{N}(\text{SiMe}_3)\text{Ph}\}_5]$ .

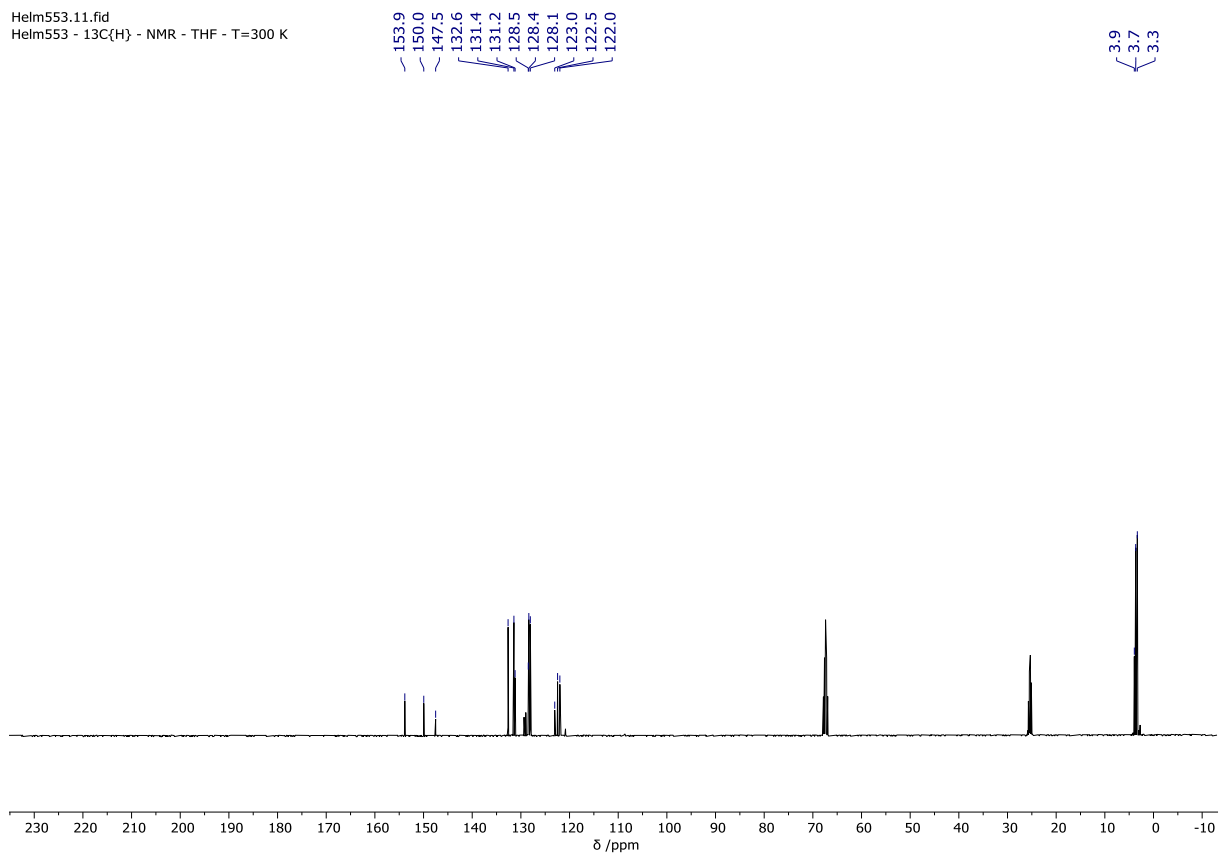

**Figure S3.**  $^{13}\text{C}\{^1\text{H}\}$ -NMR spectrum (THF- $d_8$ , 300 K, 100 MHz) of  $\text{K}[\text{Si}_6\{\text{N}(\text{SiMe}_3)\text{Ph}\}_5]$ .

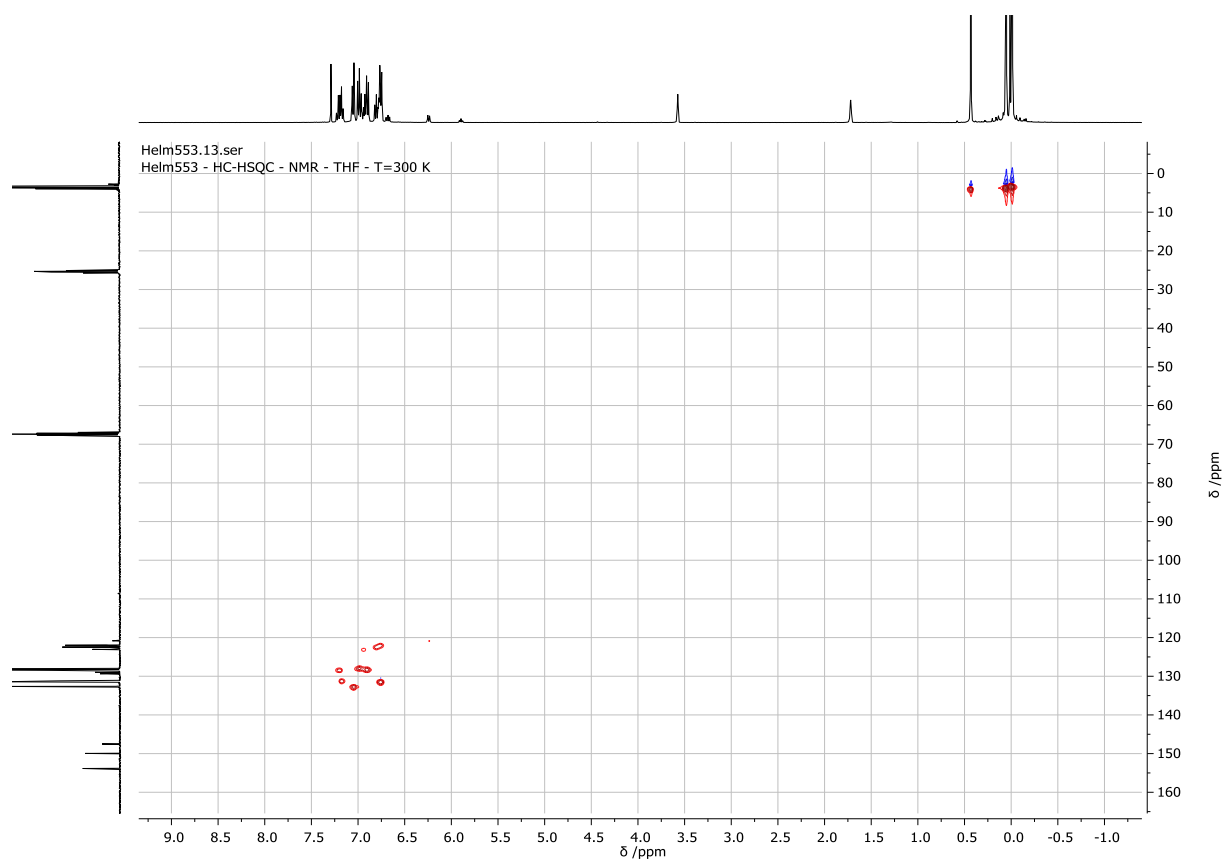

**Figure S4.** H,C-HSQC-NMR spectrum (THF-d<sub>8</sub>, 300 K) of K[Si<sub>6</sub>{N(SiMe<sub>3</sub>)Ph}<sub>5</sub>].

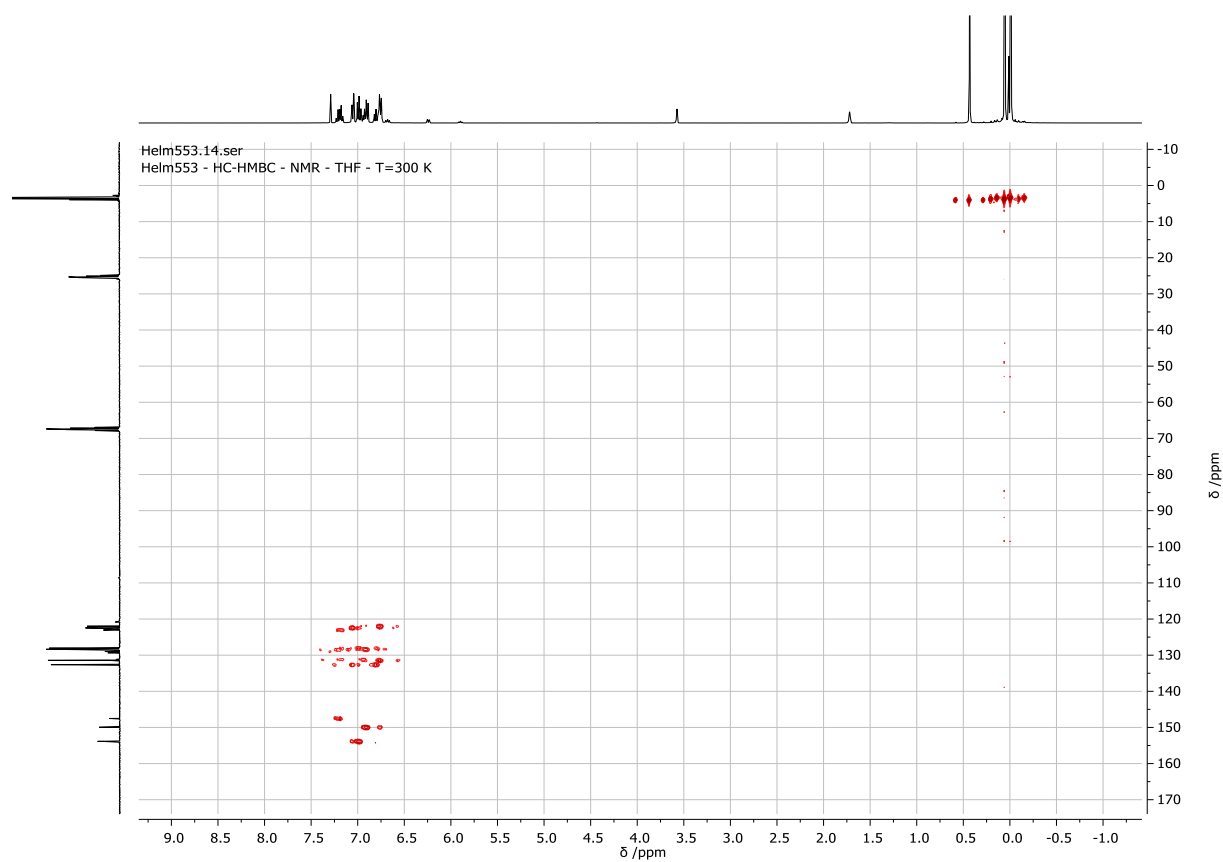

**Figure S5.** H,C-HMBC-NMR spectrum (THF-d<sub>8</sub>, 300 K) of K[Si<sub>6</sub>{N(SiMe<sub>3</sub>)Ph}<sub>5</sub>].

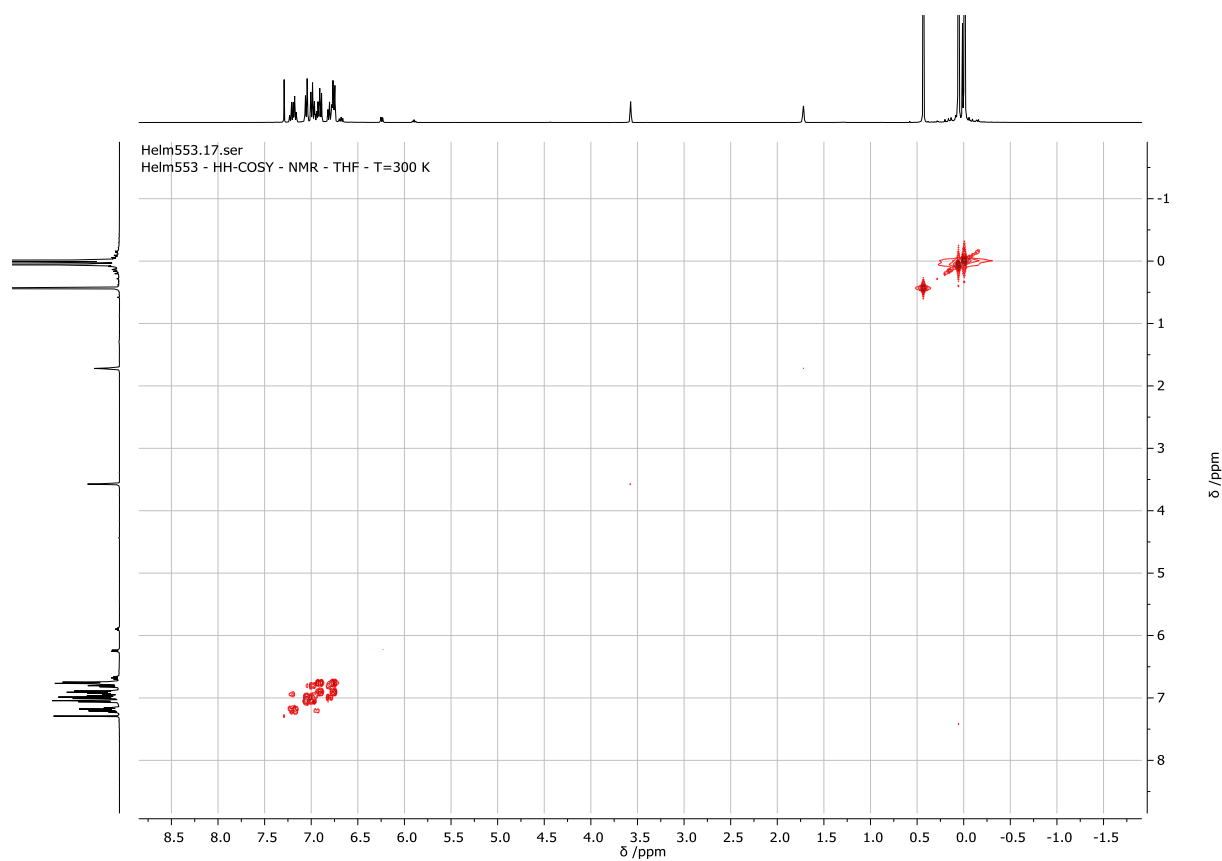

**Figure S6.** H,H-COSY-NMR spectrum (THF- $d_8$ , 300 K) of  $K[Si_6\{N(SiMe_3)Ph\}_5]$ .

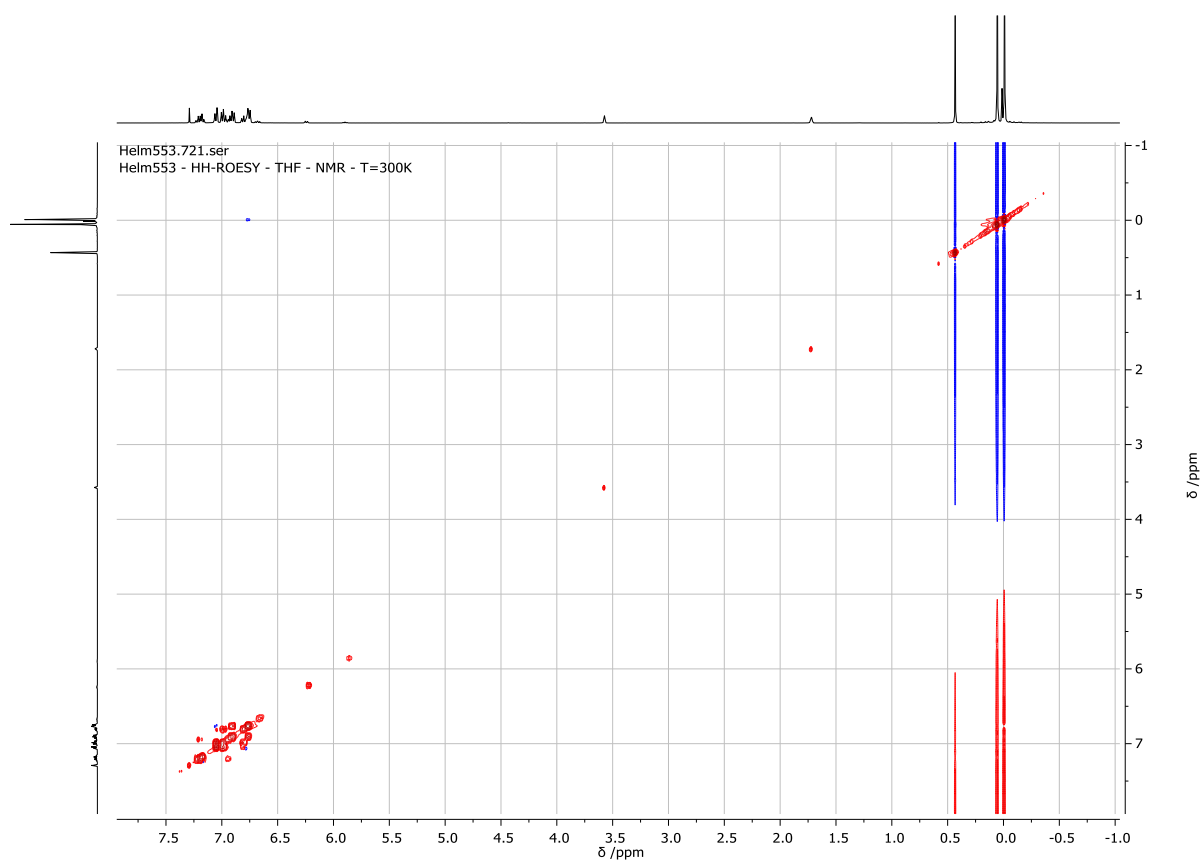

**Figure S7.** H,H-ROESY-NMR spectrum (THF- $d_8$ , 300 K) of  $K[Si_6\{N(SiMe_3)Ph\}_5]$ .

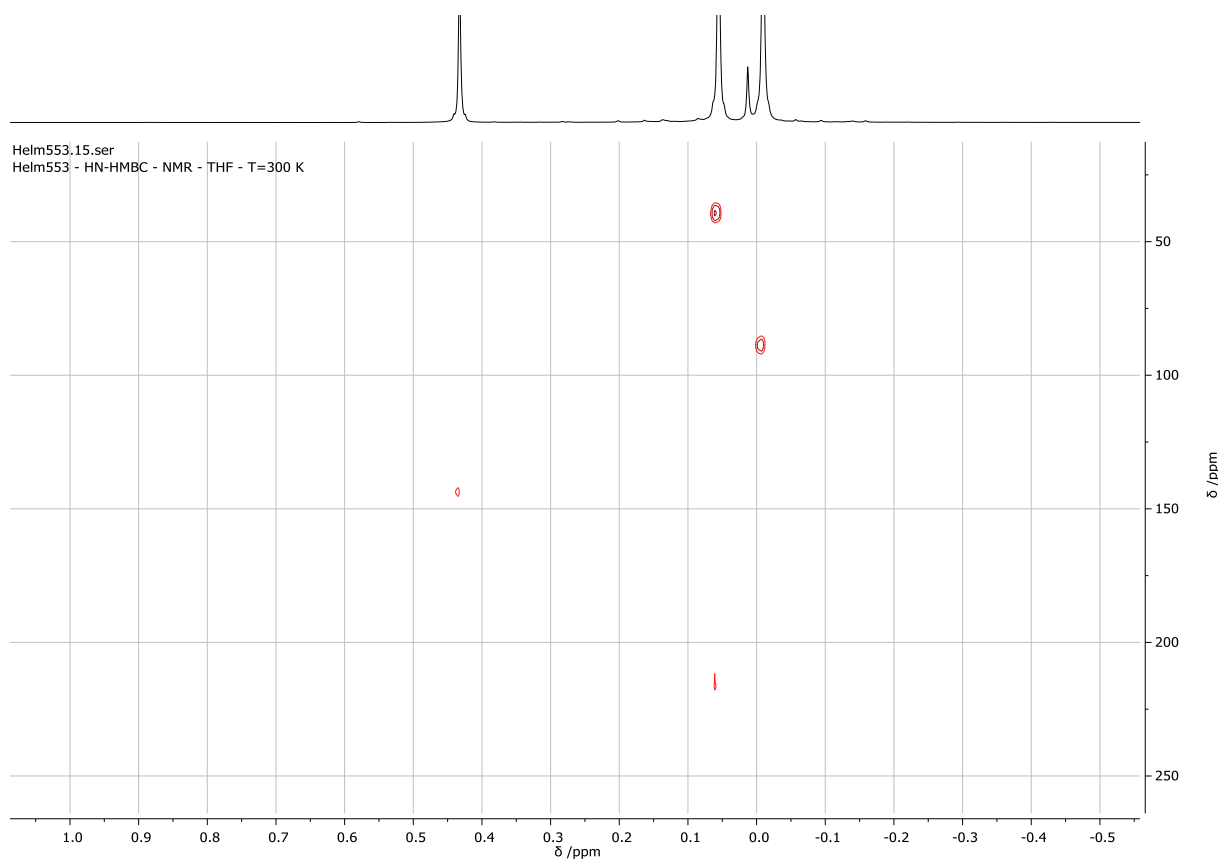

**Figure S8.** H,N-HMBC-NMR spectrum (THF-d<sub>8</sub>, 300 K) of K[Si<sub>6</sub>{N(SiMe<sub>3</sub>)Ph}<sub>5</sub>].

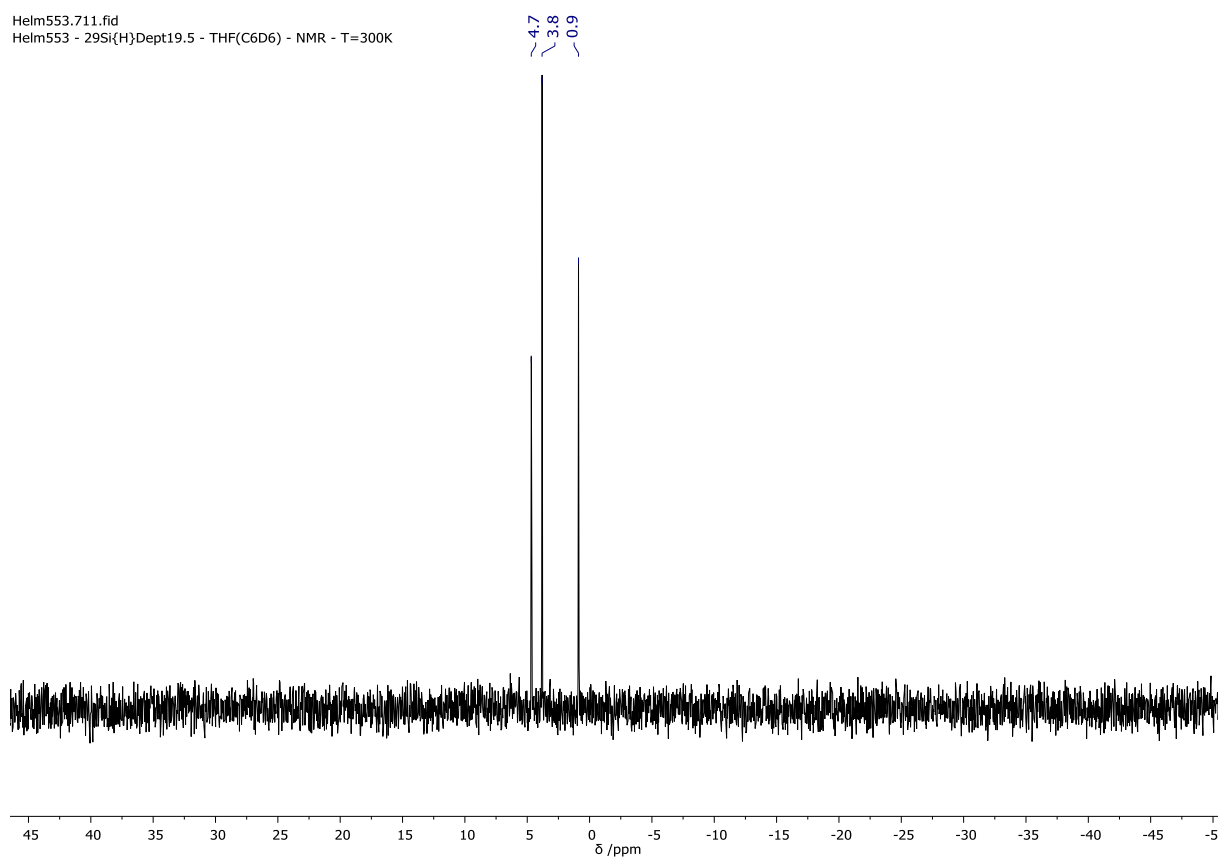

**Figure S9.** <sup>29</sup>Si{<sup>1</sup>H}DEPT19.5-NMR spectrum (THF-d<sub>8</sub>, 300 K, 80 MHz) of K[Si<sub>6</sub>{N(SiMe<sub>3</sub>)Ph}<sub>5</sub>].



Helm553.712.fid  
Helm553 -  $^{29}\text{Si}\{^1\text{H}\}$ IG - THF(C6D6) - NMR - T=300K

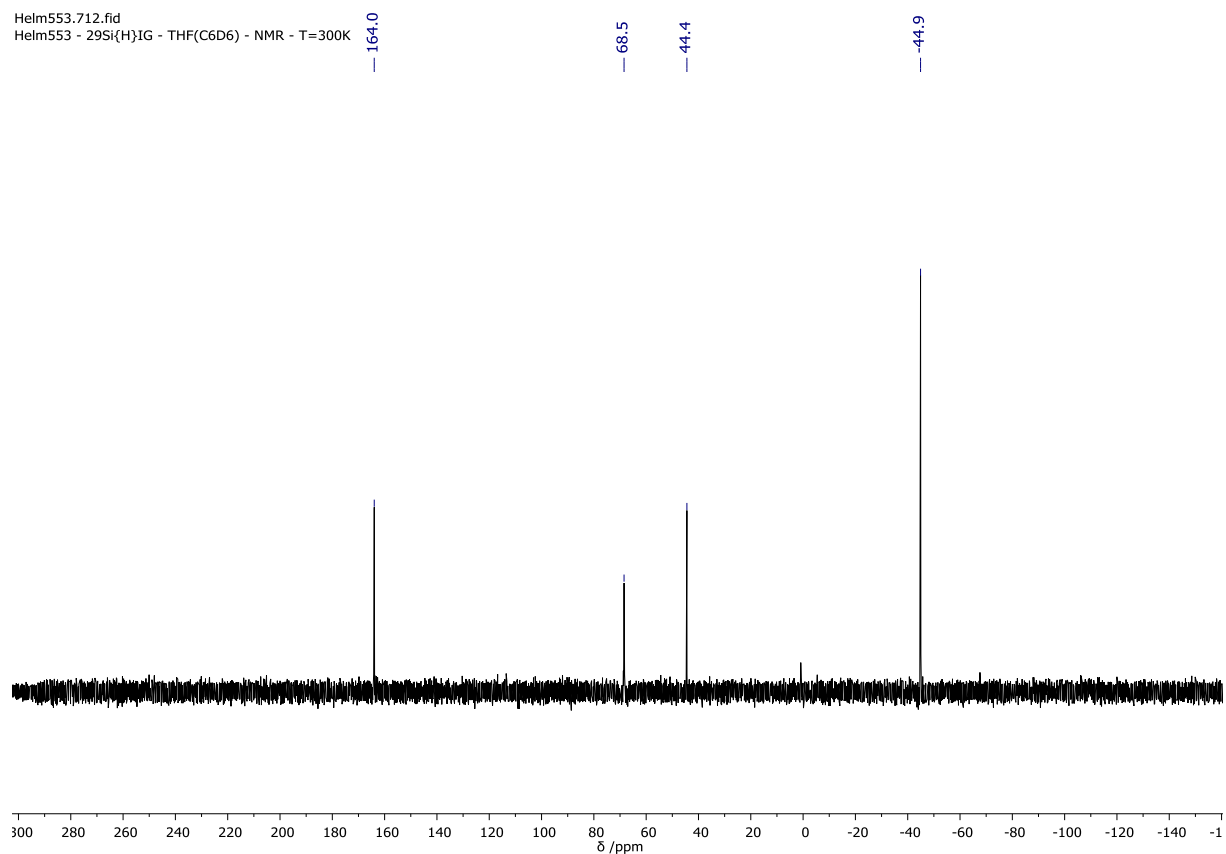

**Figure S10.**  $^{29}\text{Si}\{^1\text{H}\}$ IG-NMR spectrum (THF- $d_8$ , 300 K, 80 MHz) of  $\text{K}[\text{Si}_6\{\text{N}(\text{SiMe}_3)\text{Ph}\}_5]$ .

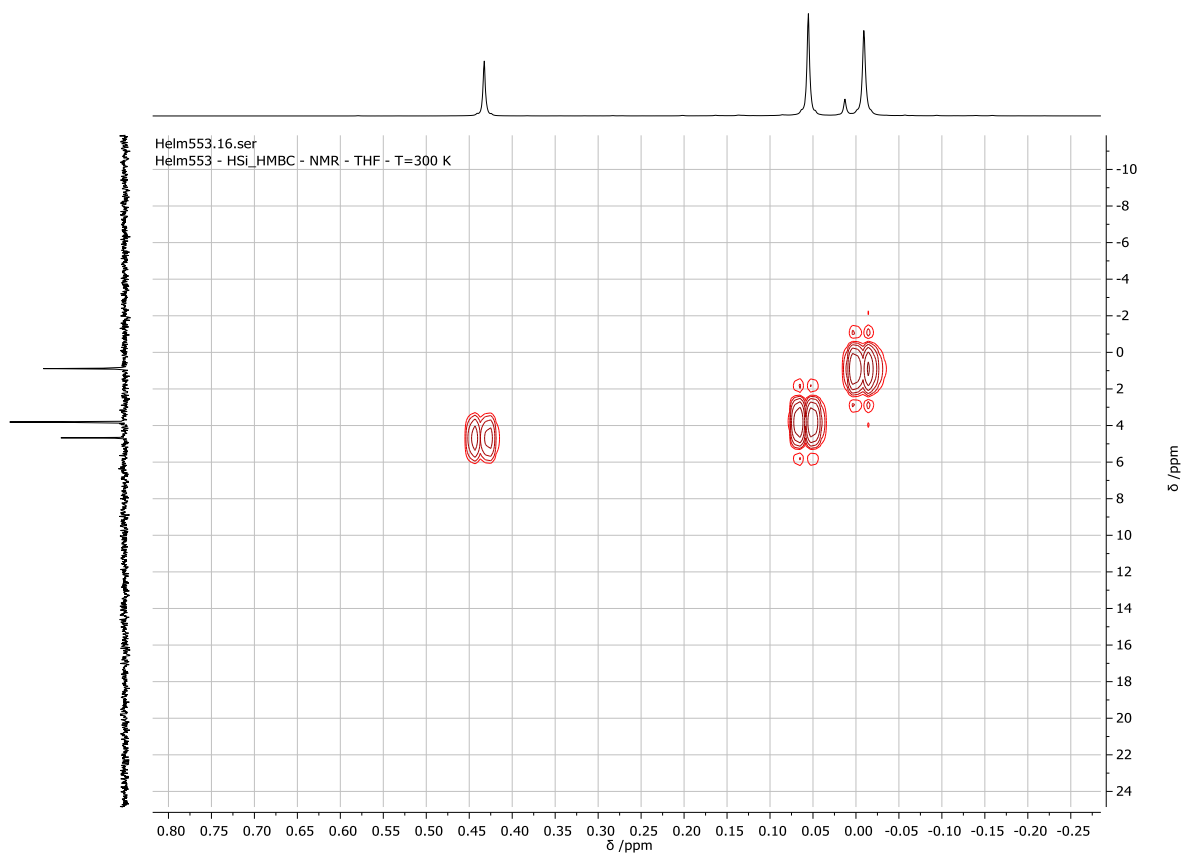

**Figure S11.** H,Si-HMBC-NMR spectrum (THF- $d_8$ , 300 K) of  $\text{K}[\text{Si}_6\{\text{N}(\text{SiMe}_3)\text{Ph}\}_5]$ .

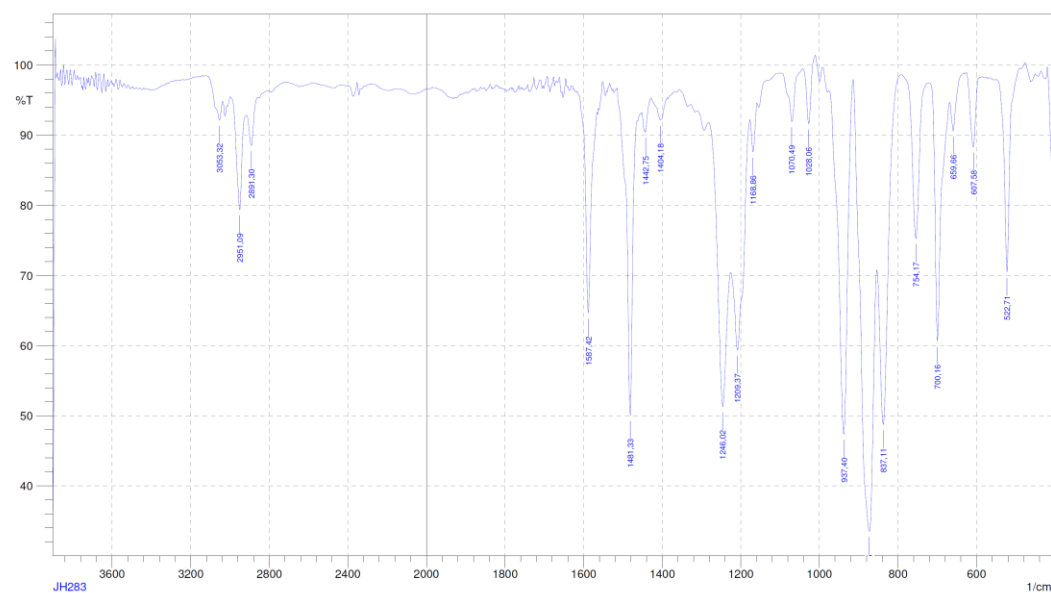

Comment:  
JH283

No. of Scans:

Date/Time: 19.11.2020 15:02:15

D:\Messdaten\Josch\JH283\JH2831.smf

Resolution:  
Apodization:

User: IR-Messung

**Figure S12.** IR spectrum of  $\text{K}[\text{Si}_6\{\text{N}(\text{SiMe}_3)\text{Ph}\}_5]$ .

HAH\_1119\_8JH-283-2\_201119085946

11/19/2020 13:30:43

sample in THF  
ESI Nanospray

VelosPro - Organisch-Chemisches Institut WWU Münster

HAH\_1119\_8JH-283-2\_201119085946 #2-20 RT: 0.02-0.29 AV: 19 NL: 8.95E11

T: FTMS - p NSI Full ms [130.00-1300.00]

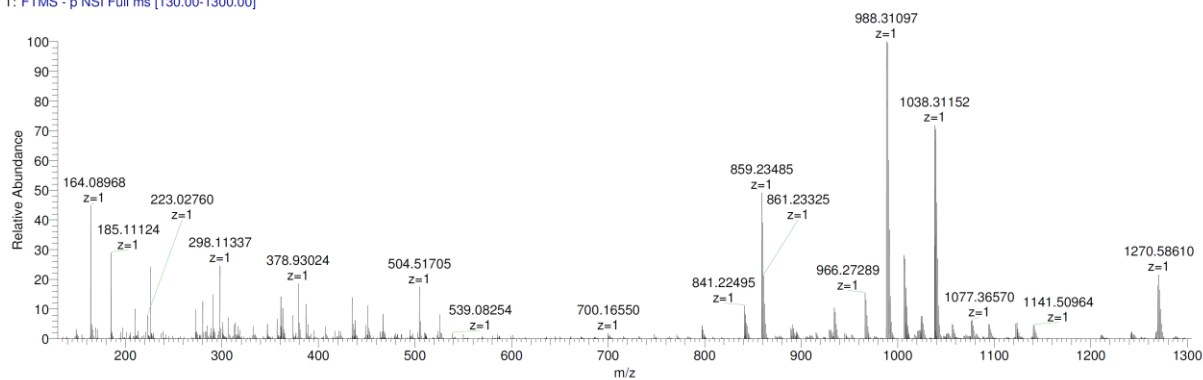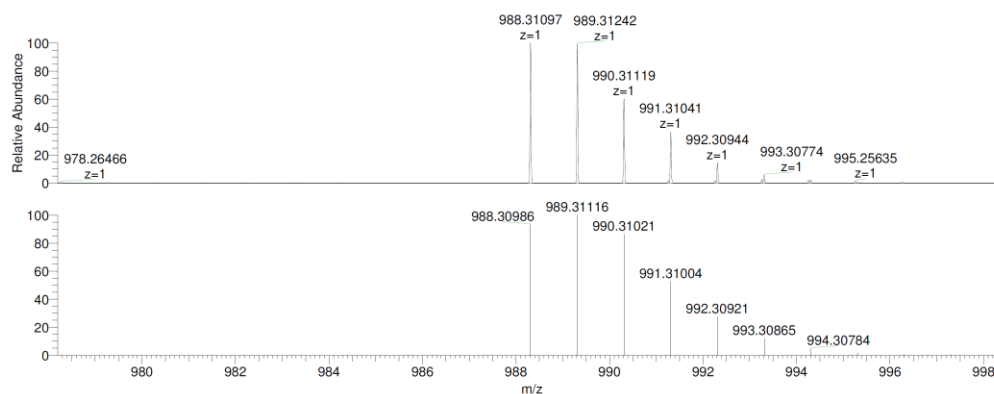

NL:  
8.95E11  
HAH\_1119\_8JH-283-  
2\_201119085946#2-20 RT:  
0.02-0.29 AV: 19 T: FTMS - p  
NSI Full ms [130.00-1300.00]

NL:  
2.64E5  
C<sub>45</sub>H<sub>70</sub>N<sub>5</sub>Si<sub>11</sub>:  
C<sub>45</sub>H<sub>70</sub>N<sub>5</sub>Si<sub>11</sub>  
c (gss; s; p; 40) (Val) Chrg -1  
R: 20000 Res. Pwr. @FWHM

**Figure S13.** ESI-MS spectrum of  $\text{K}[\text{Si}_6\{\text{N}(\text{SiMe}_3)\text{Ph}\}_5]$ .

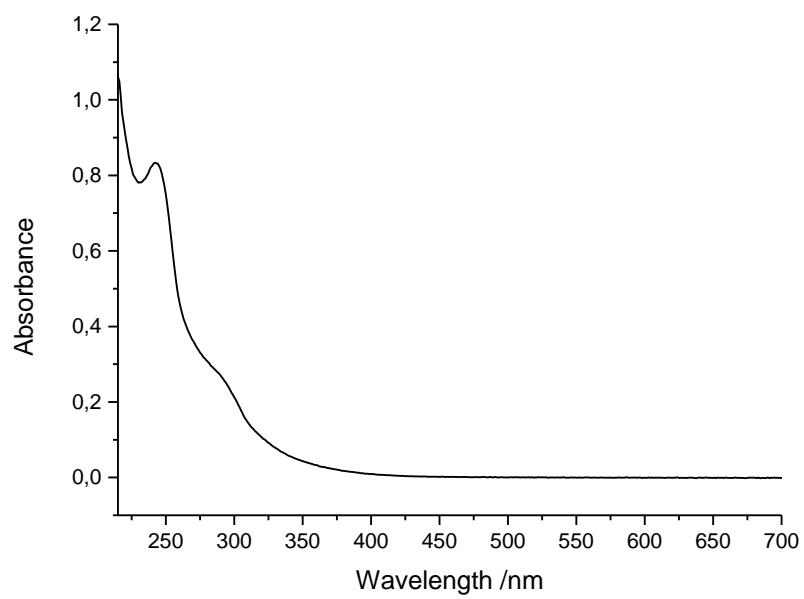

**Figure S14.** UV-Vis spectrum (THF,  $c = 3.03 \cdot 10^{-4}$  mol/L) of  $\text{K}[\text{Si}_6\{\text{N}(\text{SiMe}_3)\text{Ph}\}_5]$ .

## 2.2 Synthesis of [K[2.2.2]cryptand][Si<sub>6</sub>{N(SiMe<sub>3</sub>)Ph}<sub>5</sub>] (3)

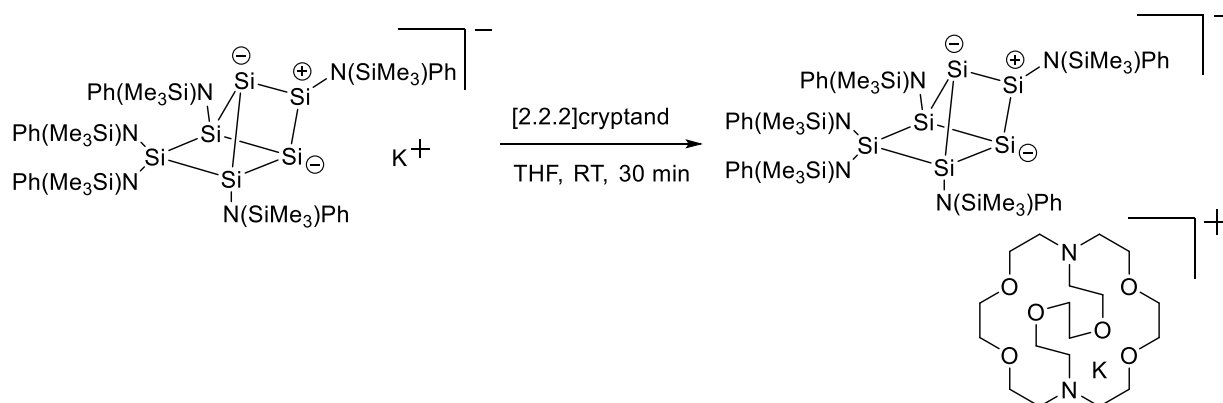

K[Si<sub>6</sub>{N(SiMe<sub>3</sub>)Ph}<sub>5</sub>] (0.141 g, 0.14 mmol, 1.0 equiv.) and [2.2.2]cryptand (0.052 g, 0.14 mmol, 1.0 equiv.) were dissolved in THF (3 mL) at room temperature. The reaction mixture was stirred for 30 min at room temperature. All volatile components were removed in vacuo, whereupon [K[2.2.2]cryptand][Si<sub>6</sub>{N(SiMe<sub>3</sub>)Ph}<sub>5</sub>] was obtained as an orange powder in quantitative yield. Single crystals of [K[2.2.2]cryptand][Si<sub>6</sub>{N(SiMe<sub>3</sub>)Ph}<sub>5</sub>] were obtained by storage of a saturated THF/*n*-hexane solution at −32 °C for 16 h.

**<sup>1</sup>H-NMR** (THF-*d*<sub>8</sub>, 300 K, 400 MHz):  $\delta$ (ppm) = 7.22 - 7.15 (4H, m); 7.08 - 7.06 (4H, m); 7.00 - 6.96 (4H, m); 6.94 - 6.87 (5H, m); 6.81 - 6.77 (2H, m); 6.76 - 6.72 (4H, m); 0.43 (9H, s); 0.05 (18H, s); −0.02 (18H, s).

**<sup>13</sup>C-NMR** (THF-*d*<sub>8</sub>, 300 K, 100 MHz):  $\delta$ (ppm) = 153.7; 150.0; 147.4; 132.7; 131.6; 131.2; 128.5; 128.3; 128.0; 123.0; 122.4; 121.9; 71.4; 68.5; 54.8; 4.0; 3.8; 3.3.

**<sup>15</sup>N,<sup>1</sup>H-HMBC-NMR** (THF-*d*<sub>8</sub>, 300 K, 41 MHz):  $\delta$ (ppm) = 144; 89; 40.

**<sup>29</sup>Si(DEPT 19.5)-NMR** (THF-*d*<sub>8</sub>, 300 K, 80 MHz):  $\delta$ (ppm) = 4.3; 3.5; 0.7.

**<sup>29</sup>Si{<sup>1</sup>H}IG-NMR** (THF-*d*<sub>8</sub>, 300 K, 80 MHz):  $\delta$ (ppm) = 164.3; 70.2; 44.3; −45.0.

**IR** (KBr pellet,  $\tilde{\nu}/\text{cm}^{-1}$  (intensity)) = 463(vw), 521(w), 569(vw), 608(vw), 660(vw), 694(w), 752(m), 841(s), 866(s), 930(m), 949(m), 997(vw), 1076(vs), 1103(vs), 1130(m), 1204(w), 1250(m), 1296(m), 1356(m), 1447(w), 1481(m), 1497(m), 1560(w), 1591(m), 1601(m), 2816(w), 2886(m), 2957(m), 3046(vw), 3381(vw).

**UV-Vis:** (THF,  $c = 1.42 \cdot 10^{-5}$  mol/L,  $\epsilon/\text{L} \cdot \text{mol}^{-1} \cdot \text{cm}^{-1}$ ):  $\lambda = 245$  nm (38932), 294 nm (13528),

**Melting point:** Decomposition at 200 °C.

| Elemental Analysis for C <sub>63</sub> H <sub>106</sub> KN <sub>7</sub> O <sub>6</sub> Si <sub>11</sub> : | H    | C     | N    |
|-----------------------------------------------------------------------------------------------------------|------|-------|------|
| calculated:                                                                                               | 7.40 | 52.38 | 6.79 |
| found:                                                                                                    | 7.57 | 52.41 | 6.43 |

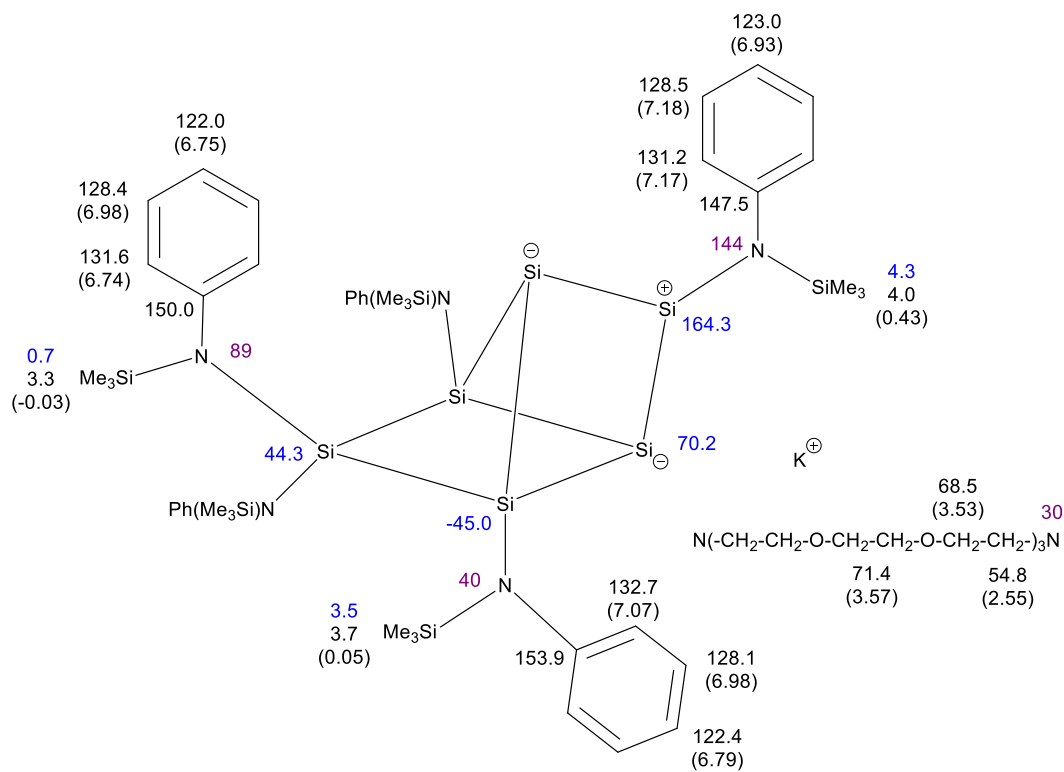

**Figure S15.** Assignment of chemical shifts to [K[2.2.2]cryptand][Si<sub>6</sub>{N(SiMe<sub>3</sub>)Ph}<sub>5</sub>], <sup>1</sup>H (in brackets), <sup>13</sup>C (black), <sup>15</sup>N (violet), <sup>29</sup>Si (blue).

Helm673.10.fid  
Helm673 - 1H - NMR - THF - T=300 K

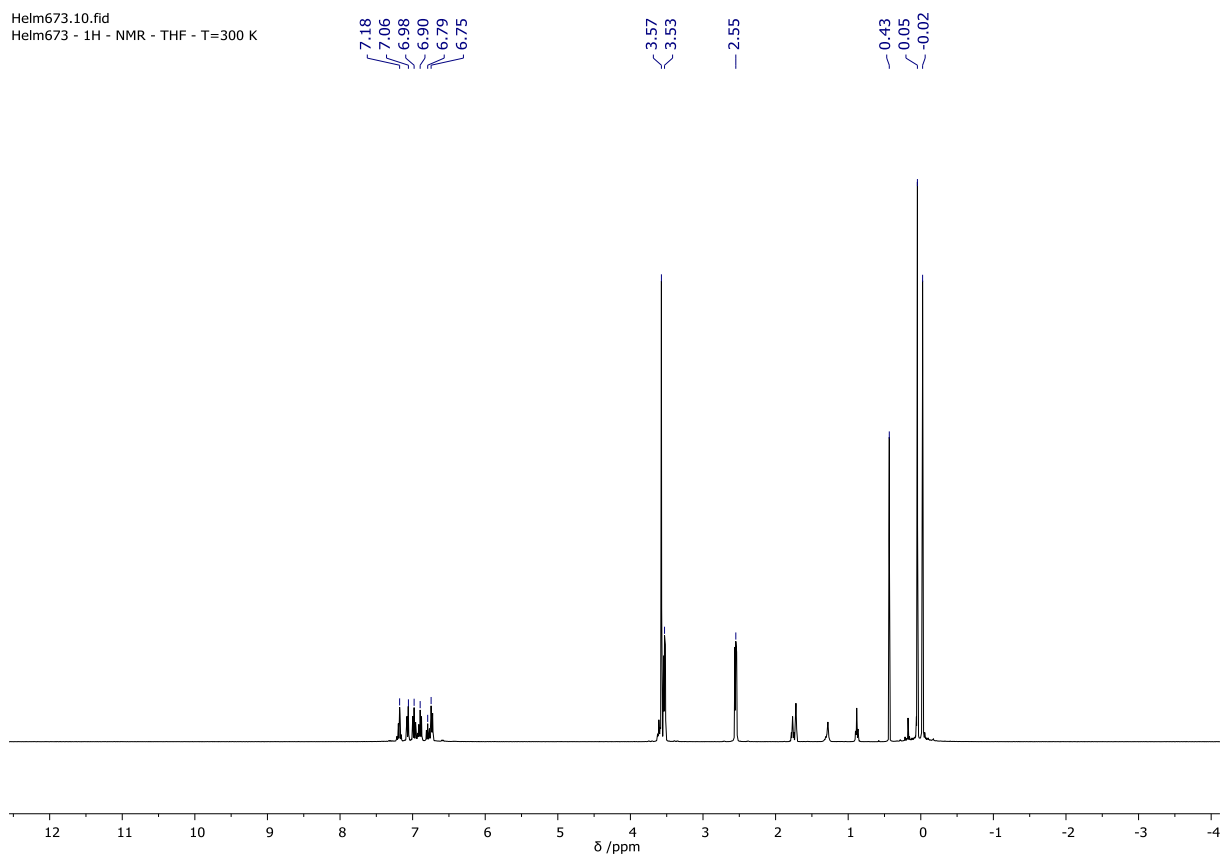

**Figure S16.**  $^1\text{H}$ -NMR spectrum (THF- $d_8$ , 300 K, 400 MHz) of **3**.

Helm673.11.fid  
Helm673 -  $^{13}\text{C}\{^1\text{H}\}$  - NMR - THF - T=300 K

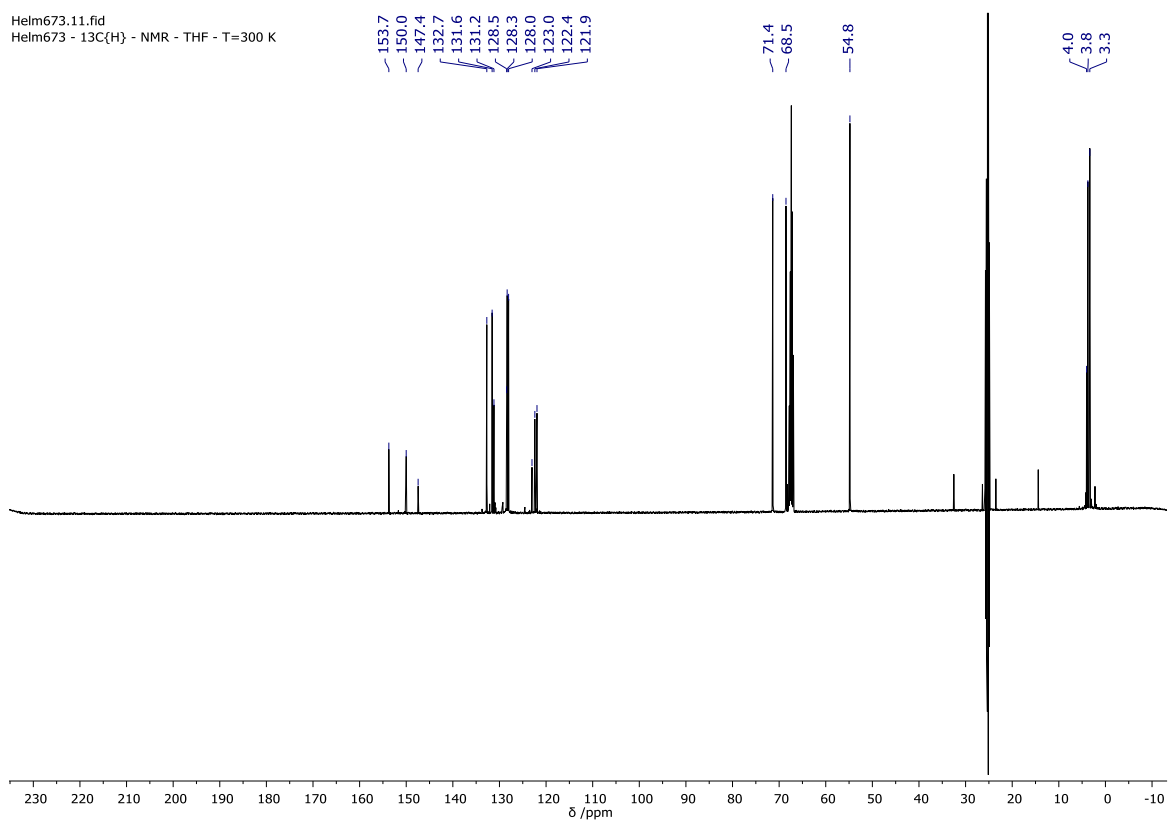

**Figure S17.**  $^{13}\text{C}\{^1\text{H}\}$ -NMR spectrum (THF- $d_8$ , 300 K, 100 MHz) of **3**.

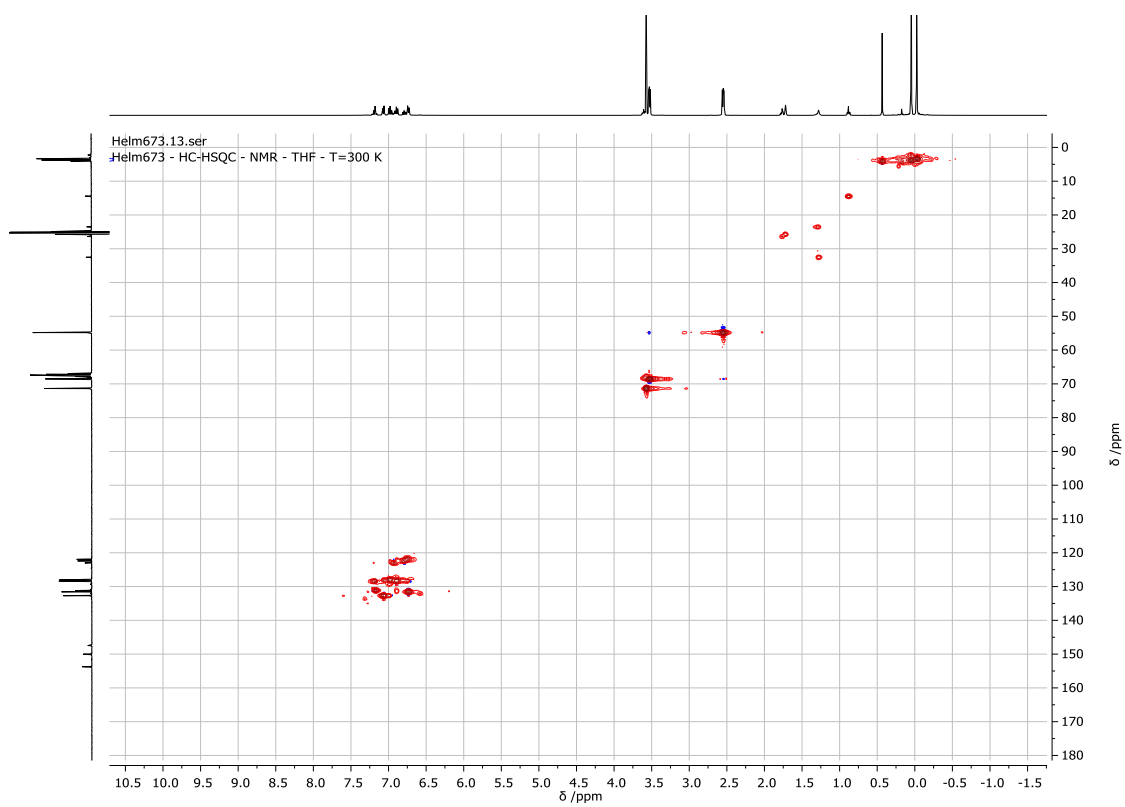

**Figure S18.** H,C-HSQC-NMR spectrum (THF-d<sub>8</sub>, 300 K) of **3**.

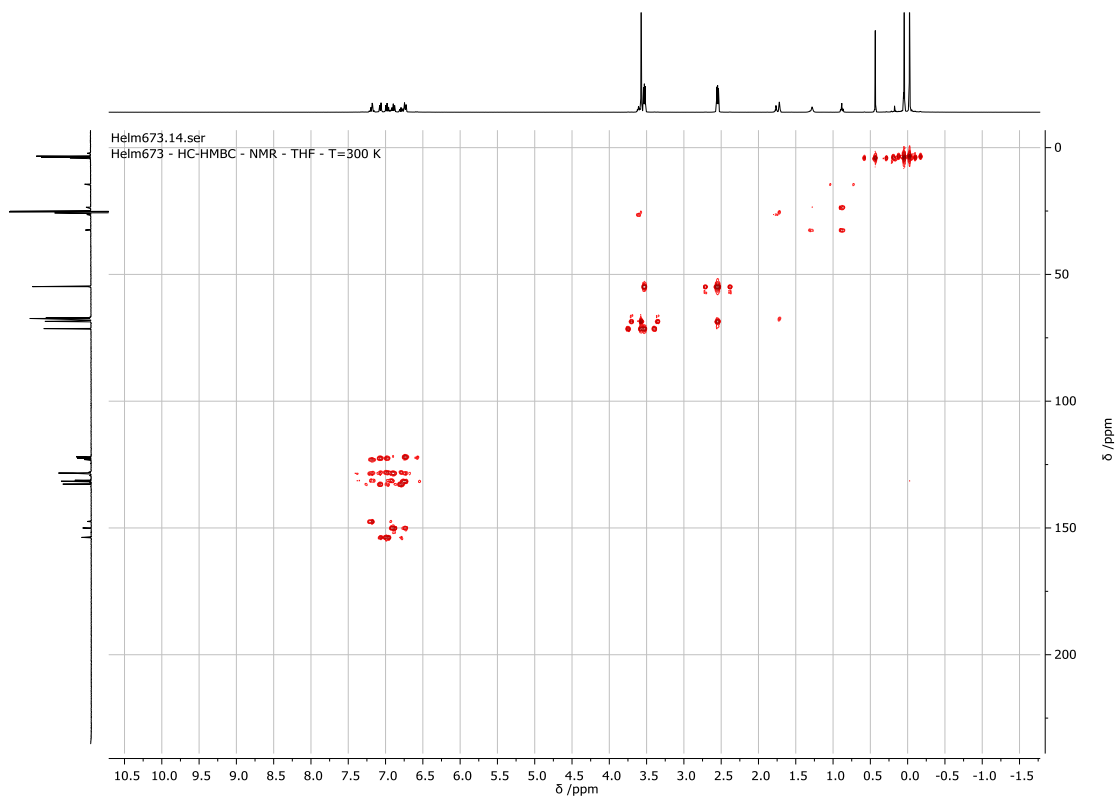

**Figure S19.** H,C-HMBC-NMR spectrum (THF-d<sub>8</sub>, 300 K) of **3**.

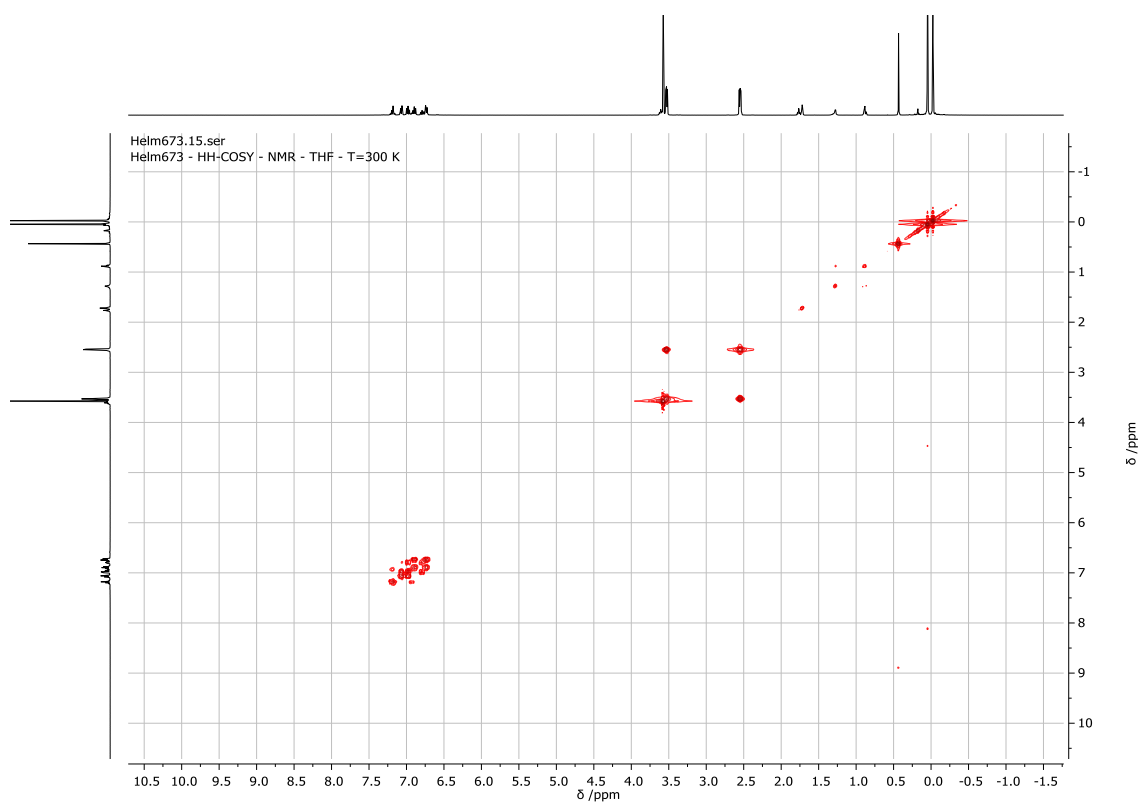

**Figure S20.** H,H-COSY-NMR spectrum (THF-d<sub>8</sub>, 300 K) of **3**.

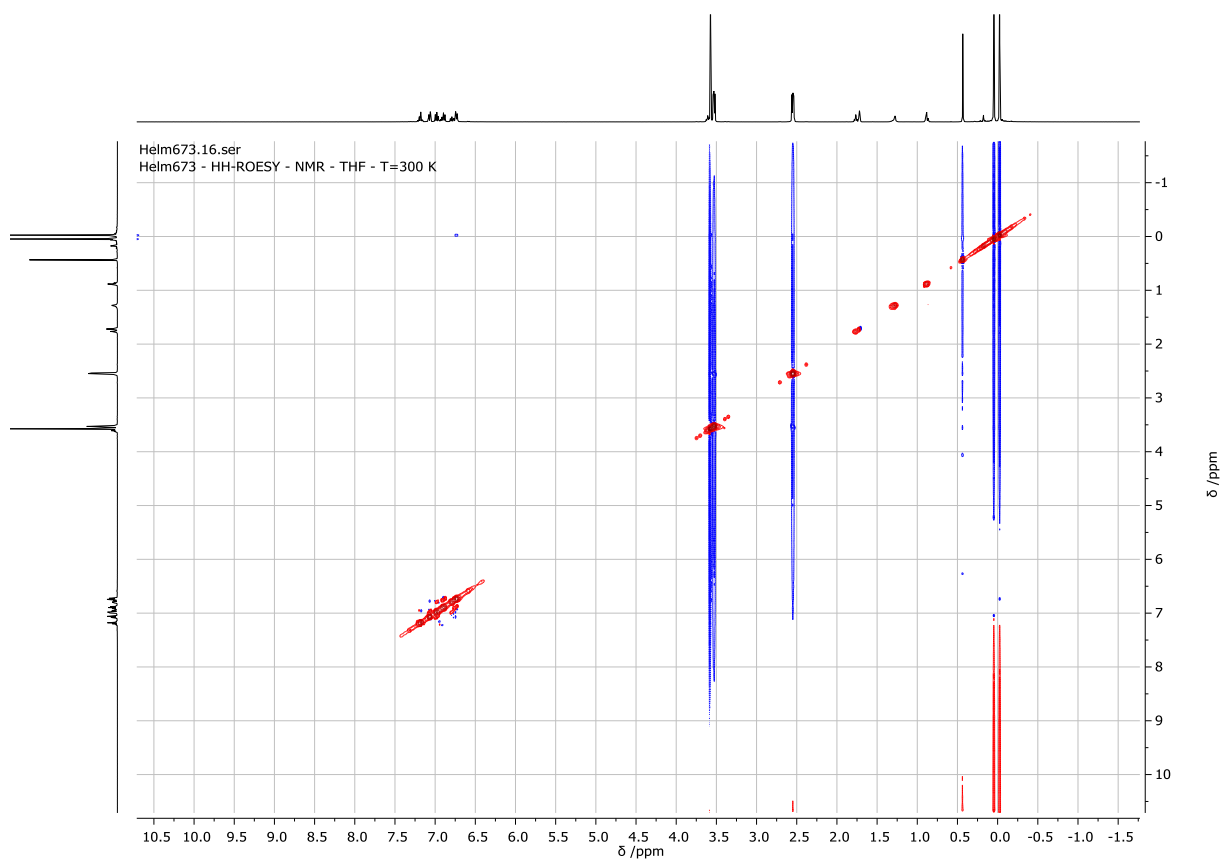

**Figure S21.** H,H-ROESY-NMR spectrum (THF-d<sub>8</sub>, 300 K) of **3**.



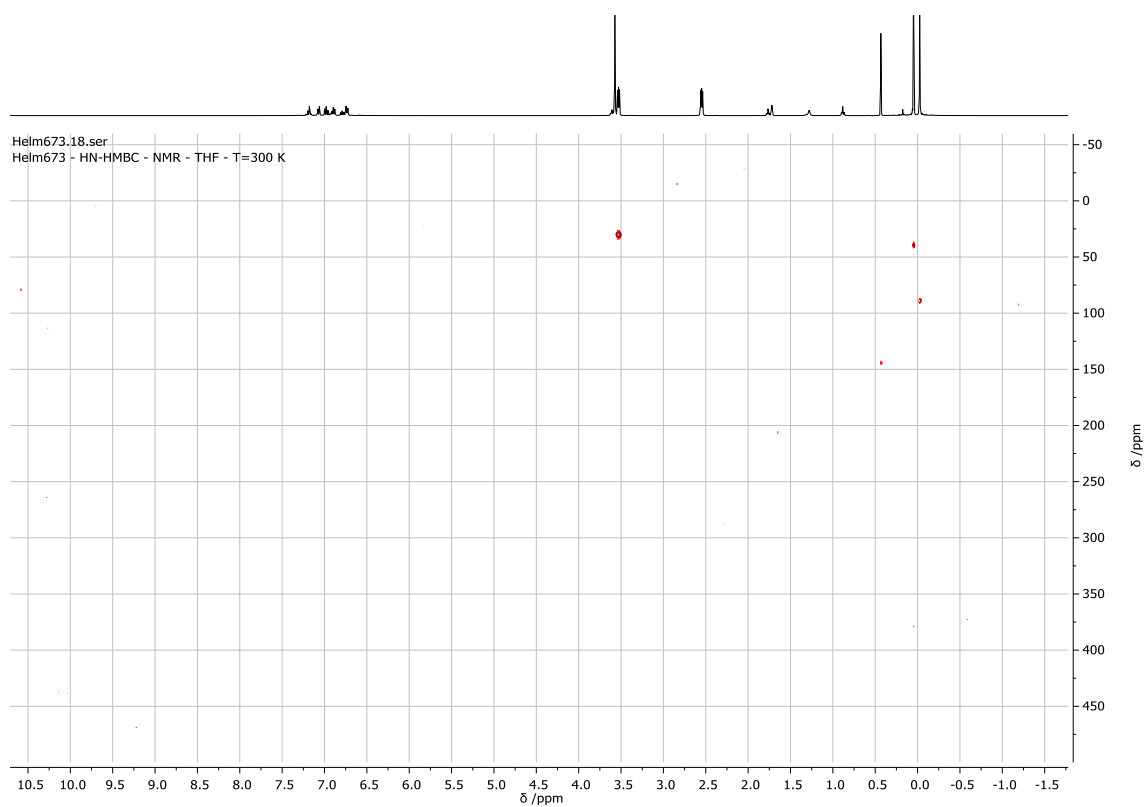

**Figure S22.** H,N-HMBC-NMR spectrum (THF- $d_8$ , 300 K) of **3**.

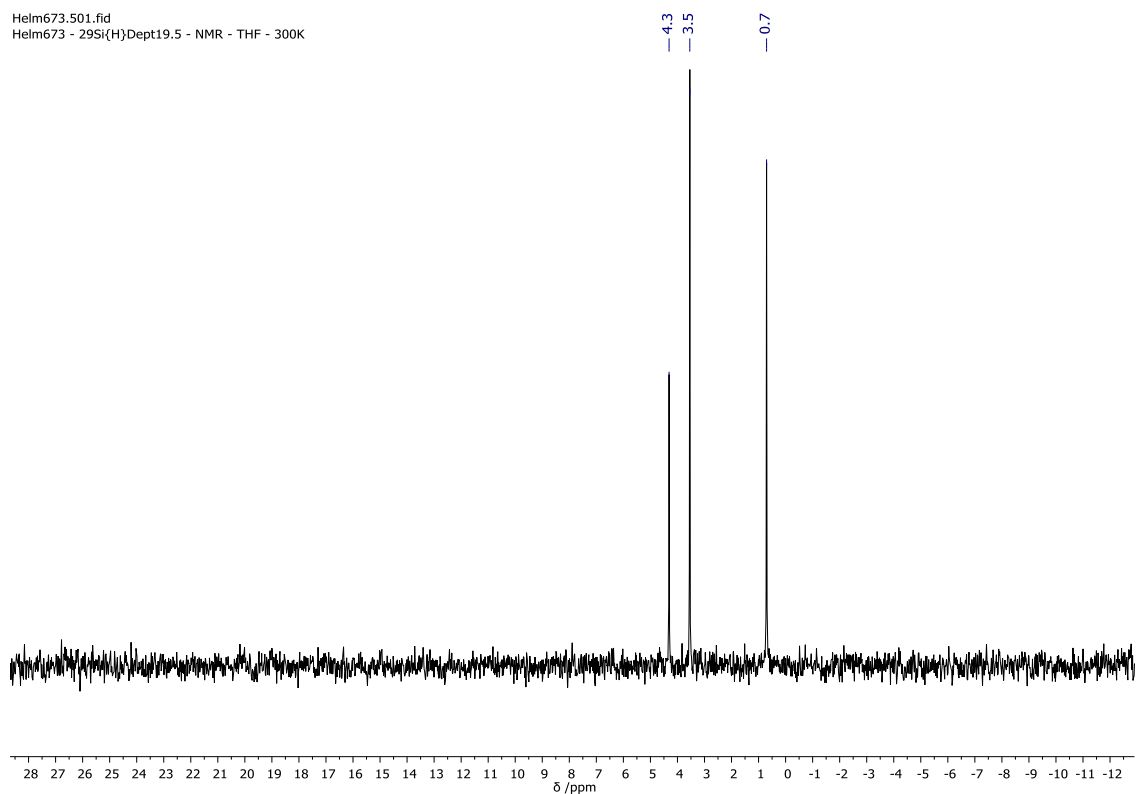

**Figure S23.**  $^{29}\text{Si}\{^1\text{H}\}$ DEPT19.5-NMR spectrum (THF- $d_8$ , 300 K, 80 MHz) of **3**.

Helm673.502.fid  
Helm673 -  $^{29}\text{Si}\{^1\text{H}\}$ IG - NMR - THF - 300K

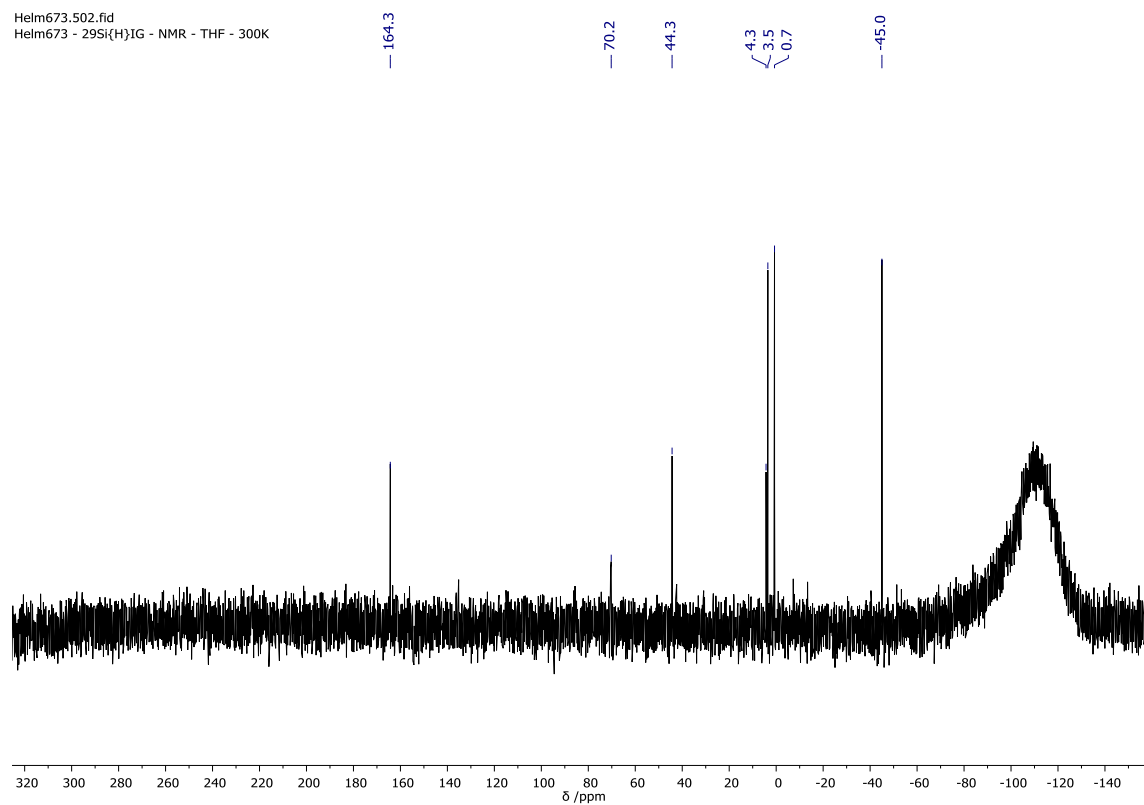

**Figure S24.**  $^{29}\text{Si}\{^1\text{H}\}$ IG-NMR spectrum (THF- $d_8$ , 300 K, 80 MHz) of **3**.

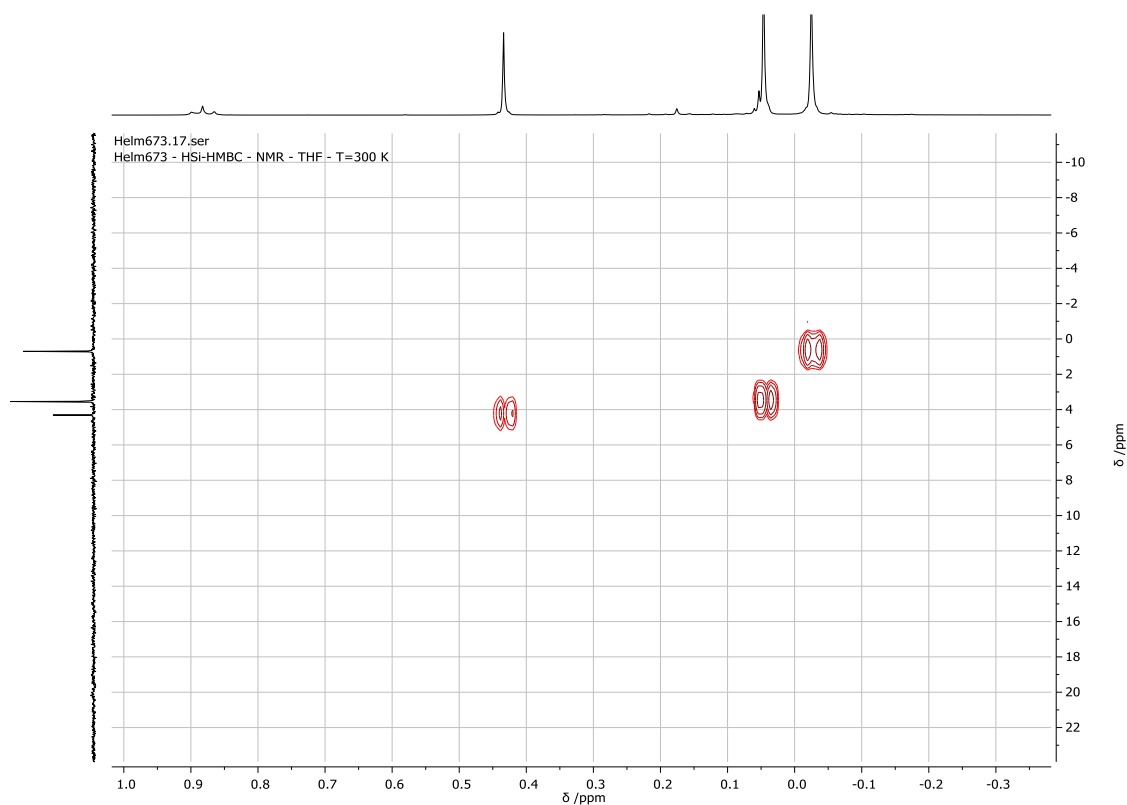

**Figure S25.** H,Si-HMBC-NMR spectrum (THF- $d_8$ , 300 K, 80 MHz) of **3**.

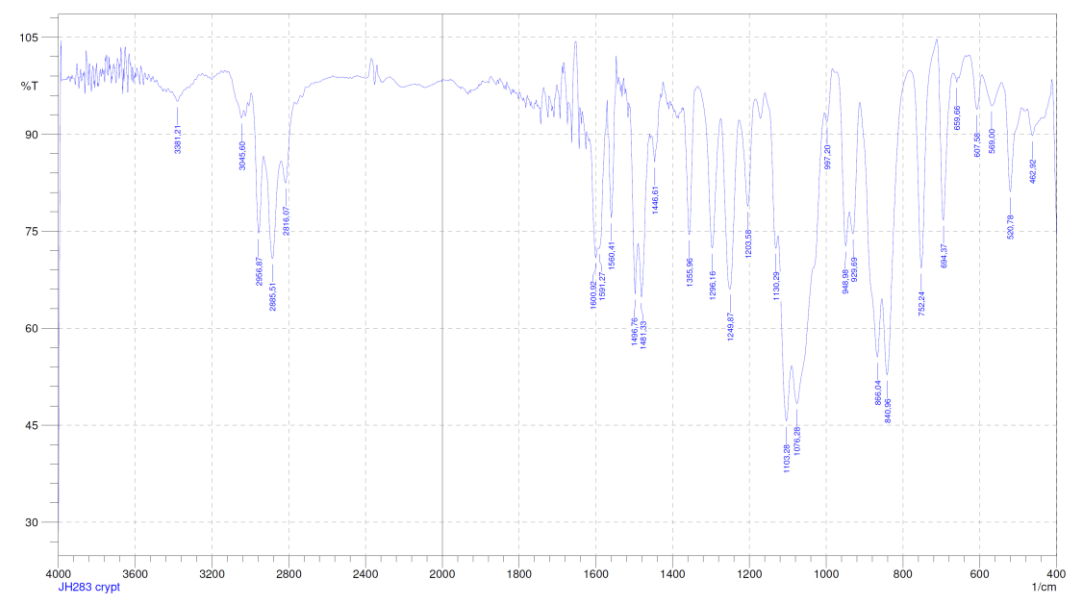

Comment:  
JH283 crypt

No. of Scans:

Date/Time: 11.08.2021 10:44:24

D:\Messdaten\Josch\JH283 crypt\JH283crypt1.smf

Resolution:  
Apodization:

User: IR-Messung

Figure S26. IR spectrum of **3**.

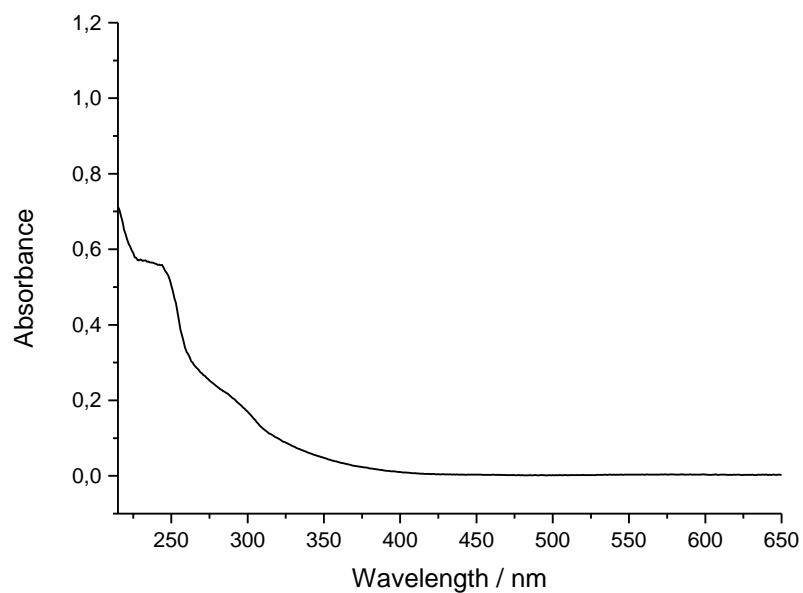

Figure S27. UV-Vis spectrum (THF,  $c = 1.42 \cdot 10^{-5}$  mol/L) of **3**.

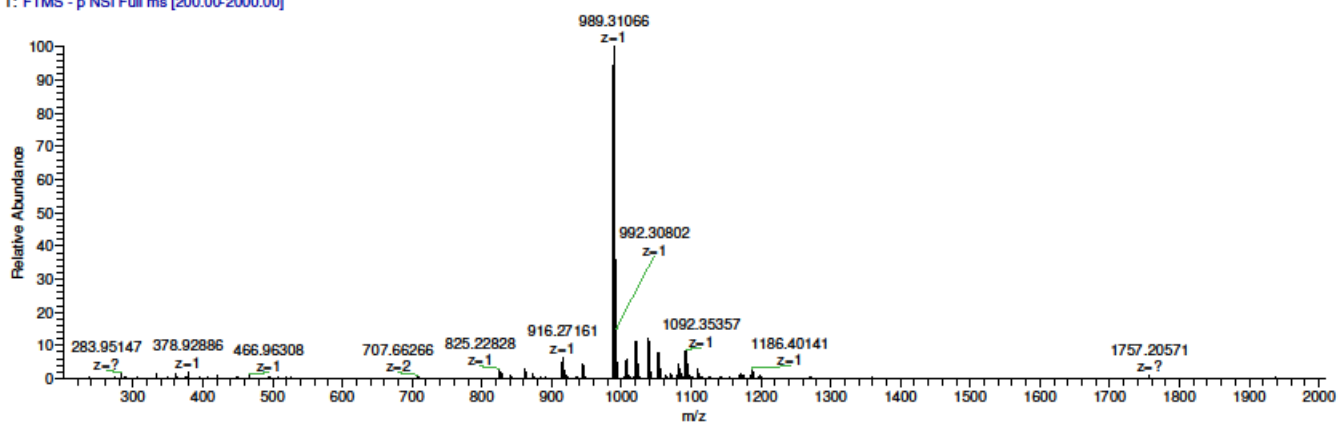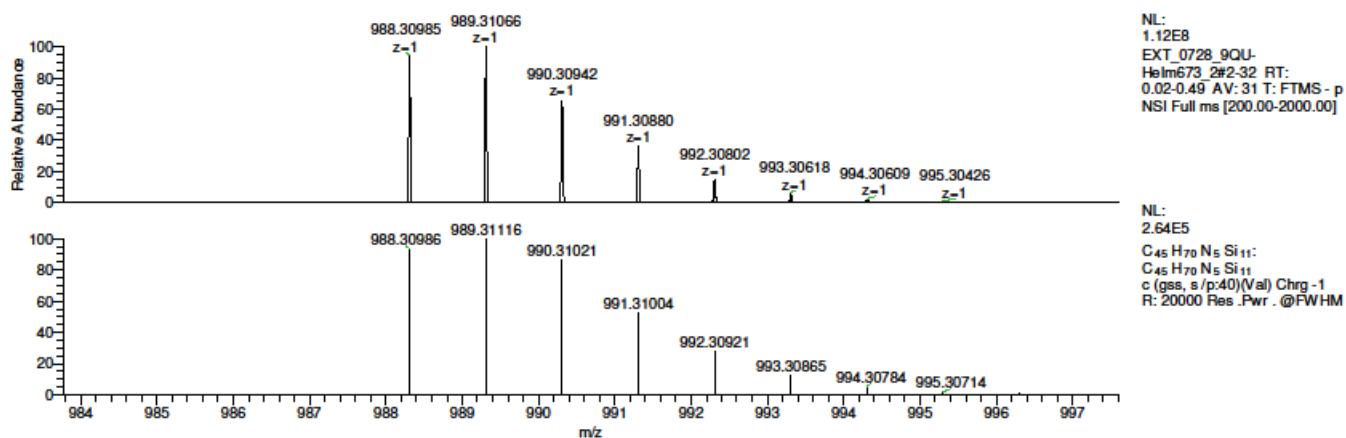

Figure S28. ESI-MS spectrum of 3.

### 2.3 Synthesis of [Si<sub>6</sub>{N(SiMe<sub>3</sub>)Ph}<sub>5</sub>Me<sub>2</sub>I] (4)

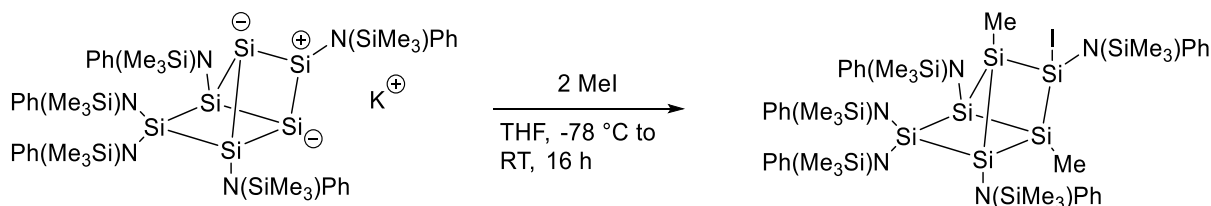

K[Si<sub>6</sub>{N(SiMe<sub>3</sub>)Ph}<sub>5</sub>] (0.092 g, 0.09 mmol, 1.0 equiv.) was dissolved in THF (10 mL) and MeI (0.1 M in *n*-hexane, 1.8 mL, 0.18 mmol, 2.0 equiv.) was added at  $-78\text{ }^{\circ}\text{C}$ . The reaction mixture was allowed to warm to room temperature and was stirred for 16 h. Volatile components were removed in vacuo and the orange residue was extracted with benzene (2 mL). Storage of the benzene solution at room temperature resulted in [Si<sub>6</sub>{N(SiMe<sub>3</sub>)Ph}<sub>5</sub>Me<sub>2</sub>I] (4) (0.037 g, 0.03 mmol, 36 %) as pale yellow crystals.

**<sup>1</sup>H-NMR** (C<sub>6</sub>D<sub>6</sub>, 300 K, 400 MHz):  $\delta(\text{ppm}) = 7.52 - 7.50$  (2H, m); 7.42 - 7.40 (2H, m); 7.13 - 7.11 (6H, m); 7.09 - 7.08 (2H, m); 6.98 - 6.91 (7H, m); 6.89 - 6.82 (4H, br.); 6.80 - 6.76 (2H, m); 0.40 (9H, s); 0.23 (18H, br.); 0.22 (3H, s); 0.21 (9H, s); 0.05 (9H, s);  $-0.04$  (6H, br.).

**<sup>13</sup>C-NMR** (C<sub>6</sub>D<sub>6</sub>, 300K, 100 MHz):  $\delta(\text{ppm}) = 151.0$ ; 150.5; 148.4; 148.3; 131.8; 130.8; 129.7; 129.7; 129.4; 129.3; 129.3; 129.2; 129.2; 129.2; 124.8; 124.7; 124.3; 123.5; 123.5; 3.6; 3.3; 2.6; 1.4; 1.4;  $-6.8$ .

**<sup>15</sup>N, <sup>1</sup>H-HMBC-NMR** (C<sub>6</sub>D<sub>6</sub>, 300 K, 41 MHz):  $\delta(\text{ppm}) = 81$ ; 27; 27.

**<sup>29</sup>Si(DEPT 19.5)-NMR** (C<sub>6</sub>D<sub>6</sub>, 300 K, 80 MHz):  $\delta(\text{ppm}) = 9.5$ ; 8.3; 7.4.

**<sup>29</sup>Si{<sup>1</sup>H}IG-NMR** (C<sub>6</sub>D<sub>6</sub>, 300 K, 80 MHz):  $\delta(\text{ppm}) = 21.8$ ; 9.5; 8.3; 7.4; 5.3;  $-7.4$ ;  $-28.3$ ;  $-49.9$ ;  $-77.6$ .

**IR** (KBr pellet,  $\tilde{\nu}/\text{cm}^{-1}$  (intensity)) = 424(vw), 455(w), 471(w), 488(w), 521(s), 610(w), 677(m), 700(vs), 720(vw), 752(m), 787(vw), 837(vs), 889(vs), 918(s), 955(vs), 1028(w), 1074(w), 1169(w), 1206(vs), 1227(s), 1250(vs), 1404(w), 1447(w), 1481(vs), 1589(s), 1942(vw), 2897(w), 2953(m), 3026(w), 3051(w).

**ESI-MS**:  $m/z = 1168.43$  [Si<sub>6</sub>{N(SiMe<sub>3</sub>)Ph}<sub>5</sub>Me]<sup>+</sup>, 1186.44 [Si<sub>6</sub>{N(SiMe<sub>3</sub>)Ph}<sub>6</sub>Me+H<sub>3</sub>O]<sup>+</sup>.

**UV-Vis**: (*n*-hexane,  $c = 5.02 \cdot 10^{-5}$  mol/L,  $\epsilon/\text{L} \cdot \text{mol}^{-1} \cdot \text{cm}^{-1}$ ):  $\lambda = 295$  nm (12059); 372 (480).

**Melting point**: 245 °C.

| Elemental Analysis for C <sub>47</sub> H <sub>76</sub> IN <sub>5</sub> Si <sub>11</sub> + Benzene: | H    | C     | N    |
|----------------------------------------------------------------------------------------------------|------|-------|------|
| calculated:                                                                                        | 6.75 | 51.96 | 5.72 |
| found:                                                                                             | 6.37 | 47.98 | 5.50 |



Helm649.3600.fid  
Helm649 - 1H - NMR - Tol - T=360 K

7.51  
7.41  
7.11  
7.08  
6.96  
6.85  
6.78

0.40  
0.23  
0.22  
0.21  
0.05  
-0.04

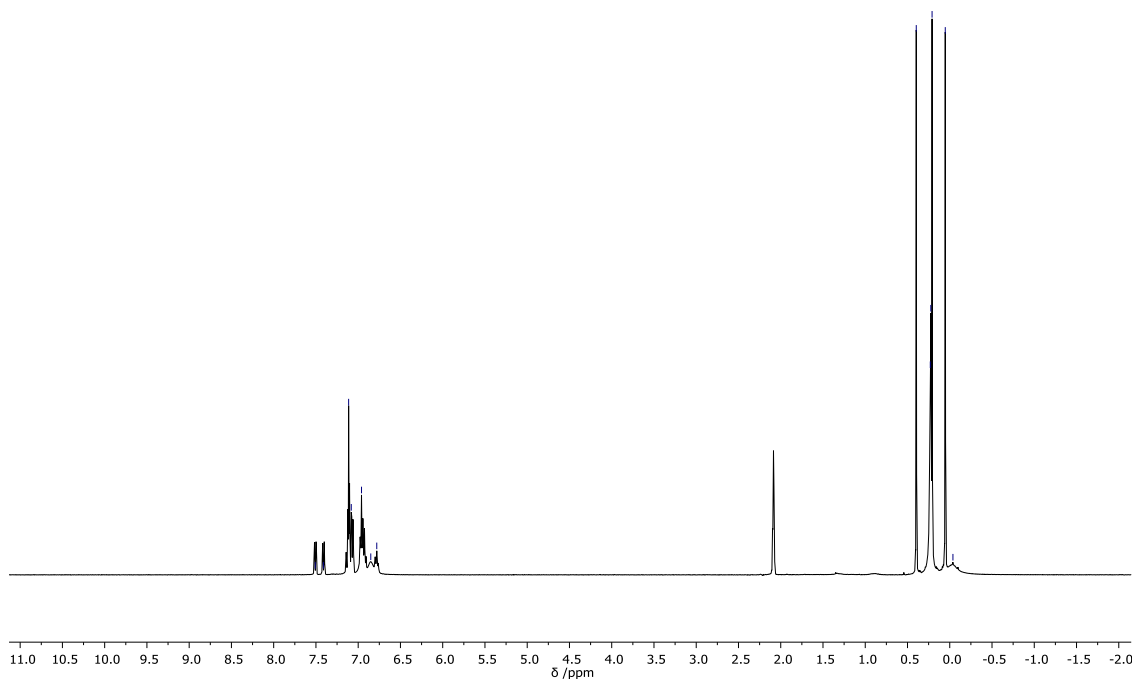

**Figure S30.**  $^1\text{H}$ -NMR spectrum (toluene- $d_8$ , 360 K, 400 MHz) of **4**.

Helm649.3600.fid  
Helm649 - 1H - NMR - Tol - T=360 K

Helm649.3500.fid  
Helm649 - 1H - NMR - Tol - T=350 K

Helm649.3400.fid  
Helm649 - 1H - NMR - Tol - T=340 K

Helm649.3300.fid  
Helm649 - 1H - NMR - Tol - T=330 K

Helm649.3200.fid  
Helm649 - 1H - NMR - Tol - T=320 K

Helm649.3100.fid  
Helm649 - 1H - NMR - Tol - T=310 K

Helm649.3000.fid  
Helm649 - 1H - NMR - Tol - T=300 K

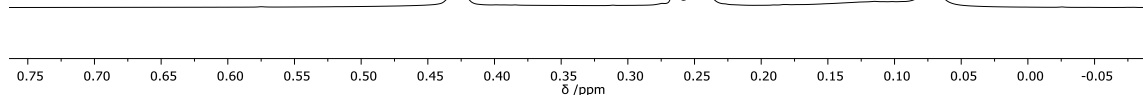

**Figure S31.** Temperature-dependent  $^1\text{H}$ -NMR spectra (toluene- $d_8$ , 400 MHz) of **4**.

Helm649.3608.fid  
Helm649 -  $^{13}\text{C}\{^1\text{H}\}$ -NMR - Tol - T=360 K

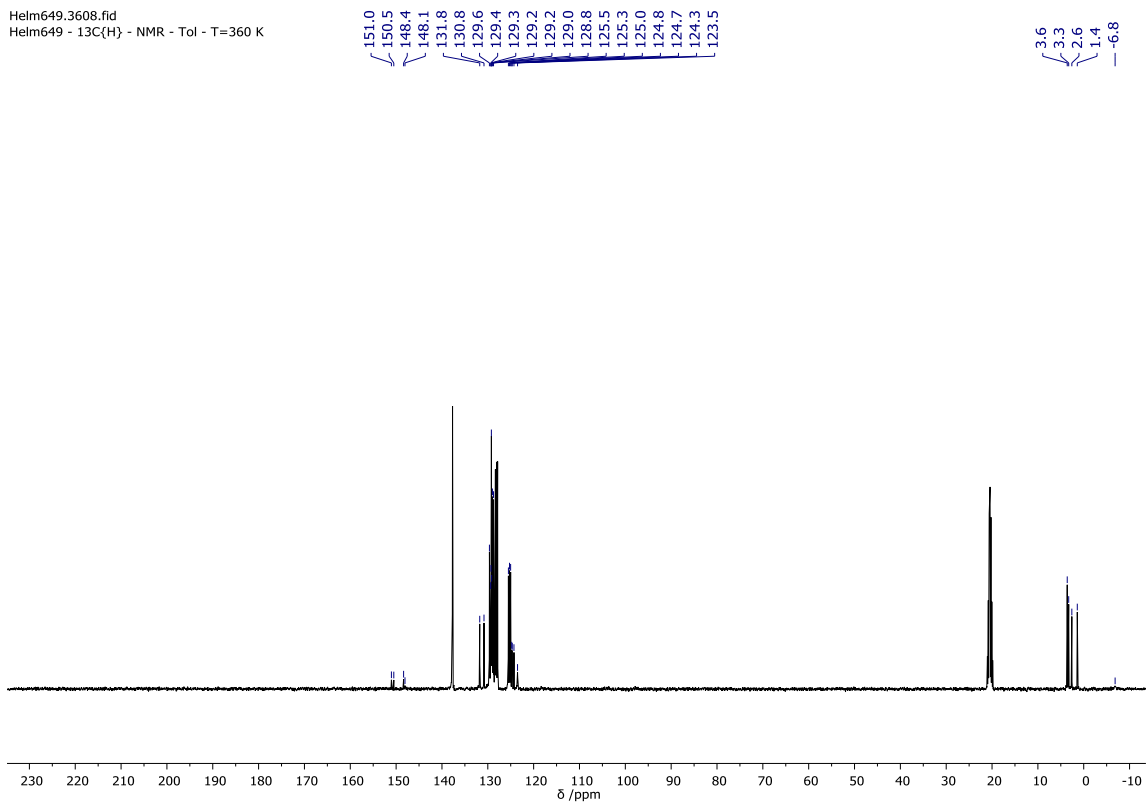

**Figure S32.**  $^{13}\text{C}\{^1\text{H}\}$ -NMR spectrum (toluene- $\text{d}_8$ , 360 K, 400 MHz) of **4**.

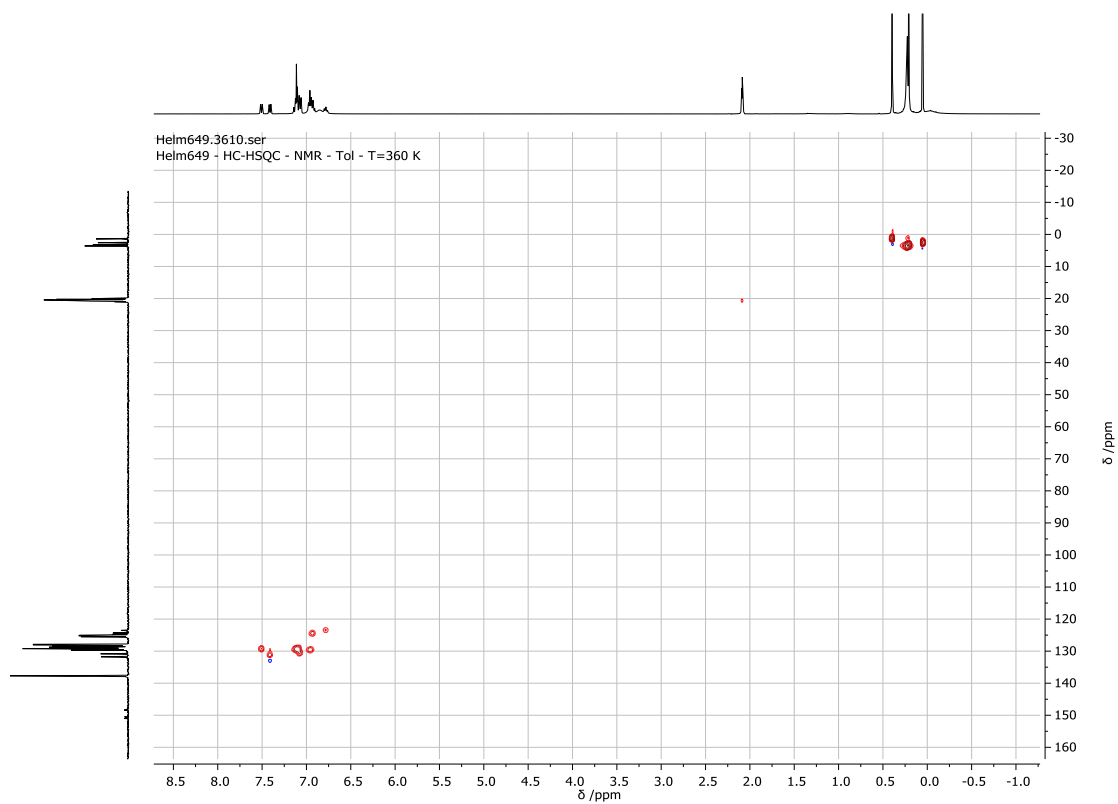

**Figure S33.** H,C-HSQC-NMR spectrum (toluene- $\text{d}_8$ , 360 K, 400 MHz) of **4**.



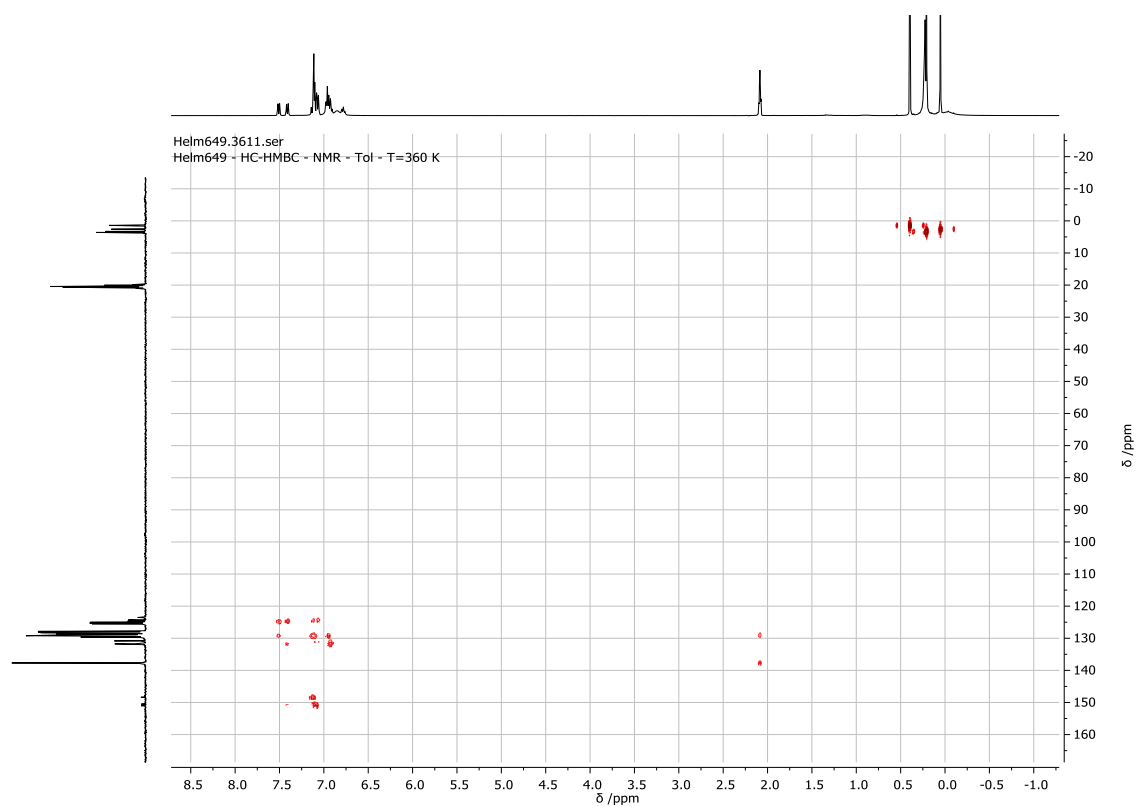

**Figure S34.** H,C-HMBC-NMR spectrum (toluene-d<sub>8</sub>, 360 K, 400 MHz) of **4**.

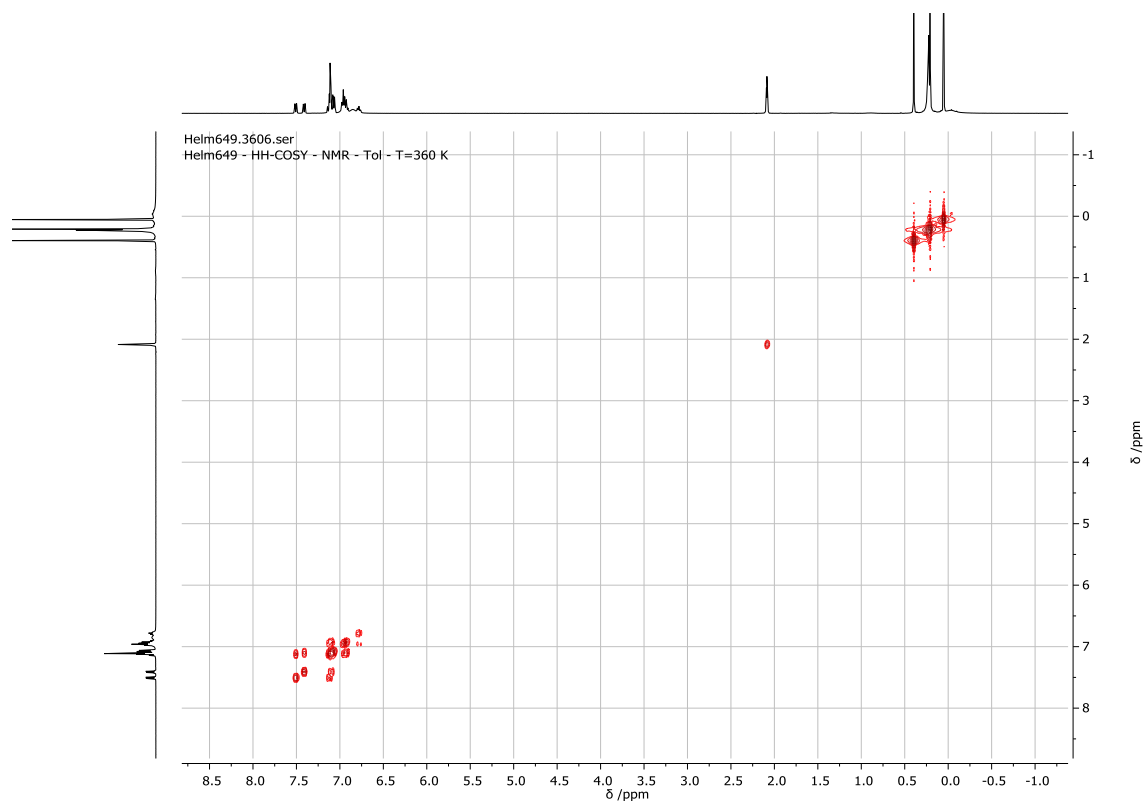

**Figure S35.** H,H-COSY-NMR spectrum (toluene-d<sub>8</sub>, 360 K, 400 MHz) of **4**.

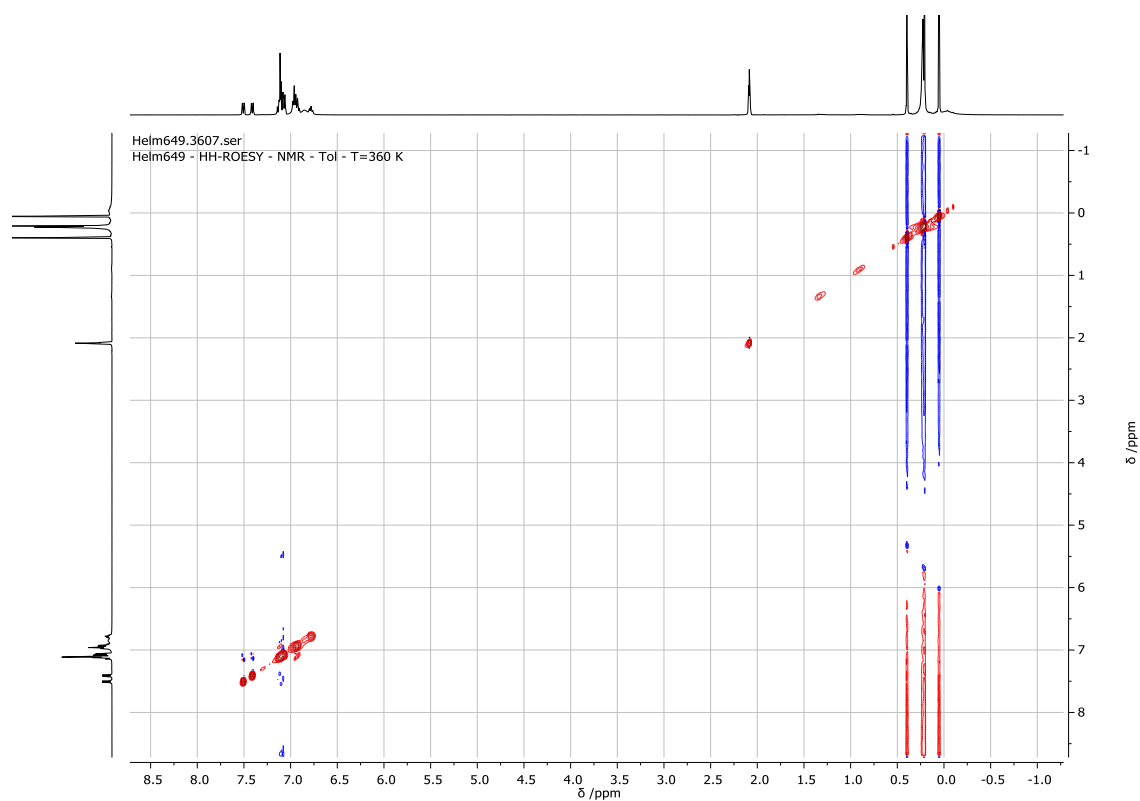

**Figure S36.** H,H-ROESY-NMR spectrum (toluene-d<sub>8</sub>, 360 K, 400 MHz) of **4**.

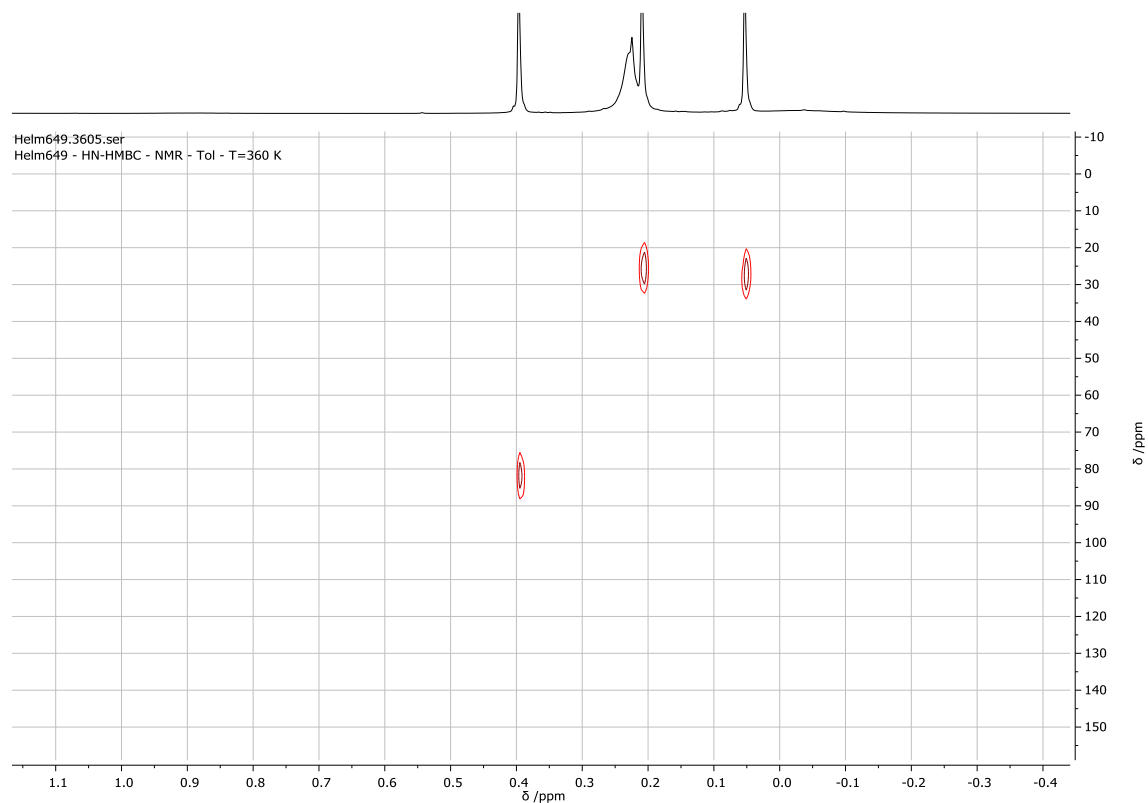

**Figure S37.** H,N-HSQC-NMR spectrum (toluene-d<sub>8</sub>, 360 K, 400 MHz) of **4**.

Helm649.3601.fid  
Helm649 - 29Si{H}Dept19.5 - NMR - Tol - T=360 K

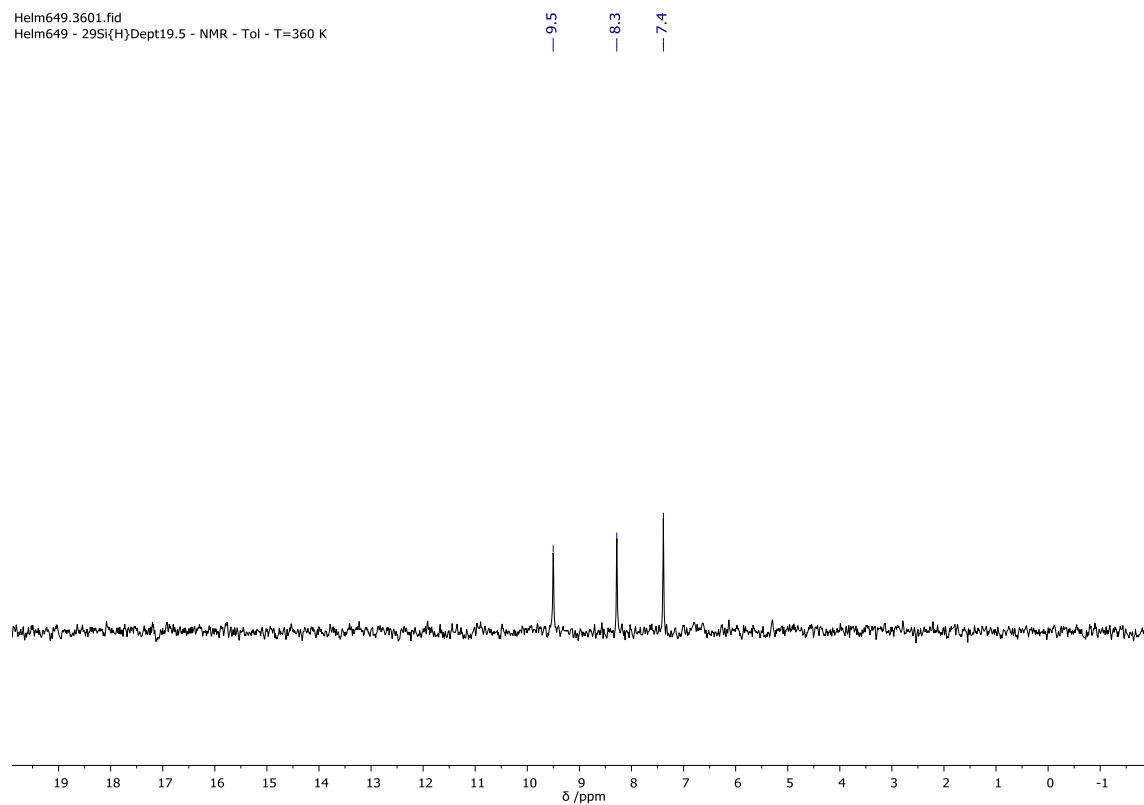

**Figure S38.**  $^{29}\text{Si}\{^1\text{H}\}$ DEPT19.5-NMR spectrum (toluene- $d_8$ , 360 K, 80 MHz) of **4**.

Helm649.3602.fid  
Helm649 - 29Si{H}IG - NMR - Tol - T=360 K

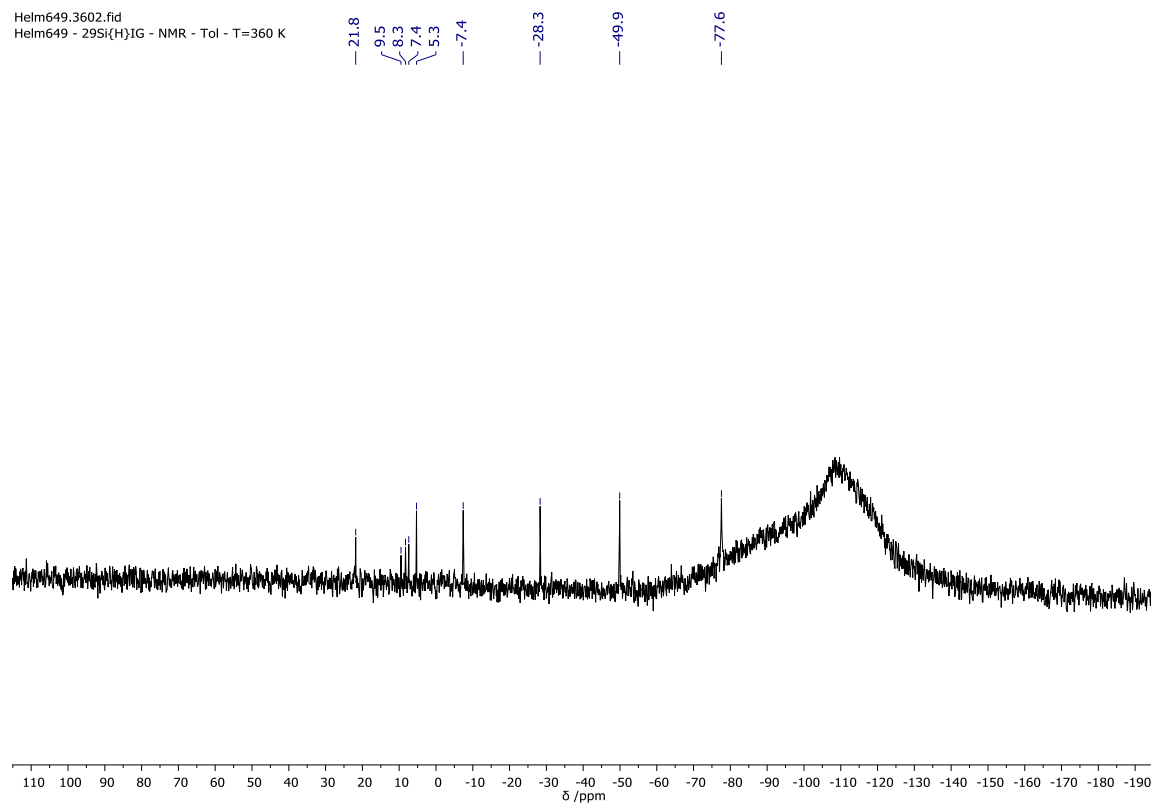

**Figure S39.**  $^{29}\text{Si}\{^1\text{H}\}$ IG-NMR spectrum (toluene- $d_8$ , 360 K, 80 MHz) of **4**.

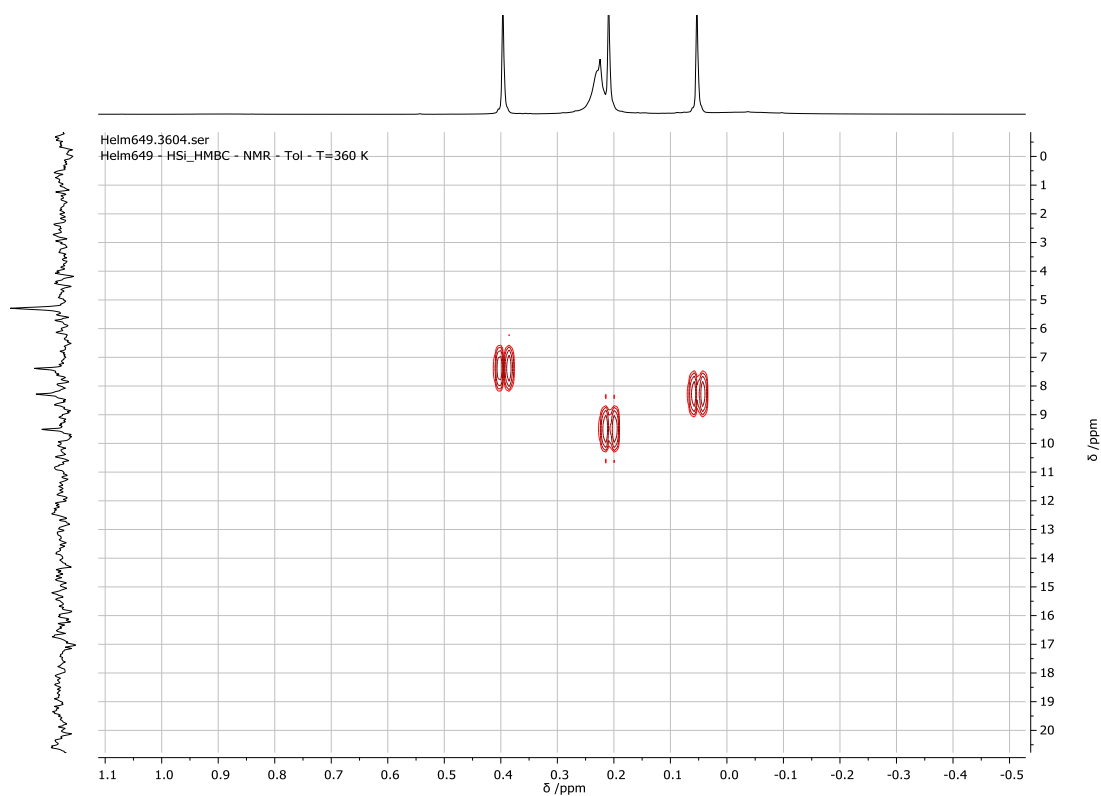

Figure S40. H,Si-HMBC-NMR spectrum (toluene-d<sub>8</sub>, 360 K) of **4**.

SHIMADZU

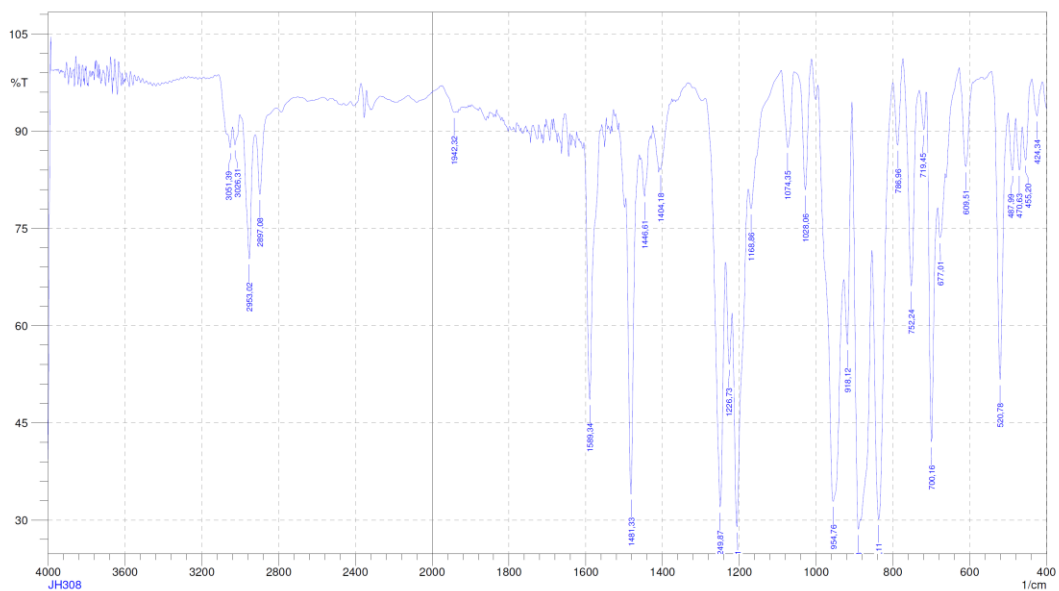

Comment:  
JH308

No. of Scans:

D:\Messdaten\Josch\JH308\JH3081.smf

Resolution:  
Apodization:

Date/Time: 13.04.2021 09:53:11

User: IR-Messung

Figure S41. IR spectrum of **4**.

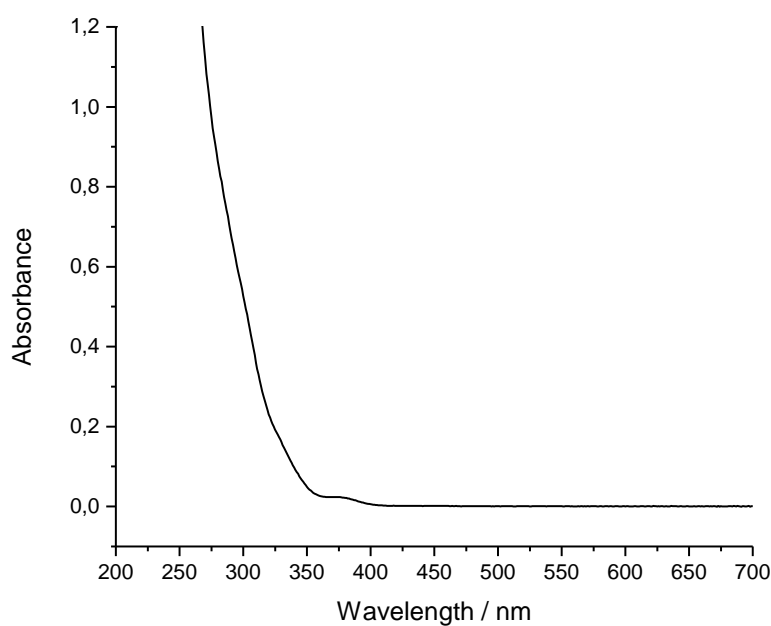

**Figure S42.** UV-Vis spectrum (*n*-hexane,  $c = 5.02 \cdot 10^{-5}$  mol/L) of **4**.

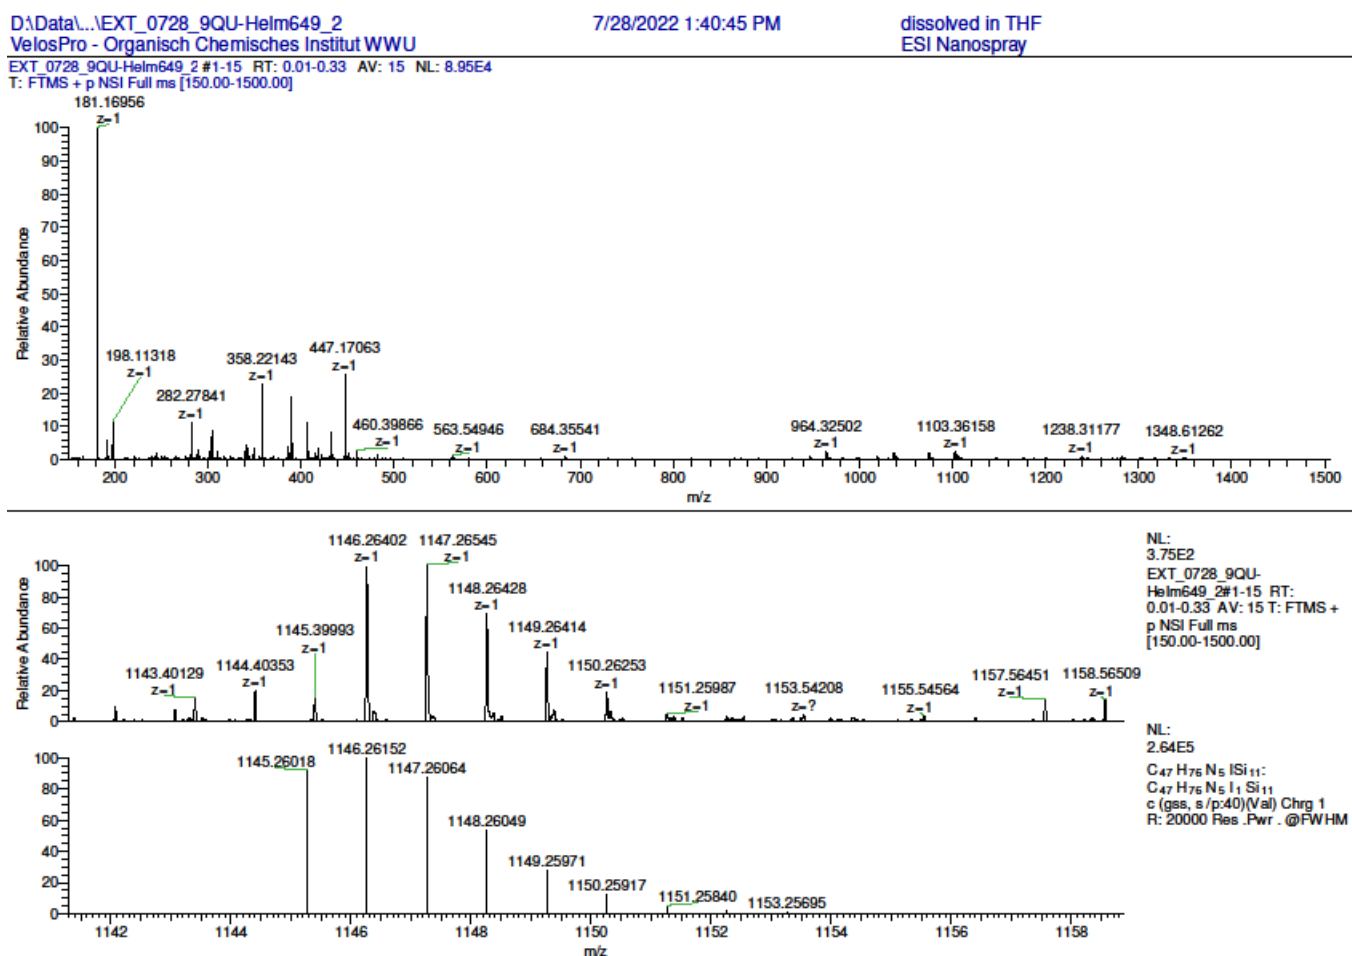

**Figure S43.** ESI-MS spectrum of **4**.

## 2.4 Synthesis of $[\text{Si}_6\{\text{N}(\text{SiMe}_3)\text{Ph}\}_5\text{Cl}_2\text{SiCl}_3]$ (**5**)

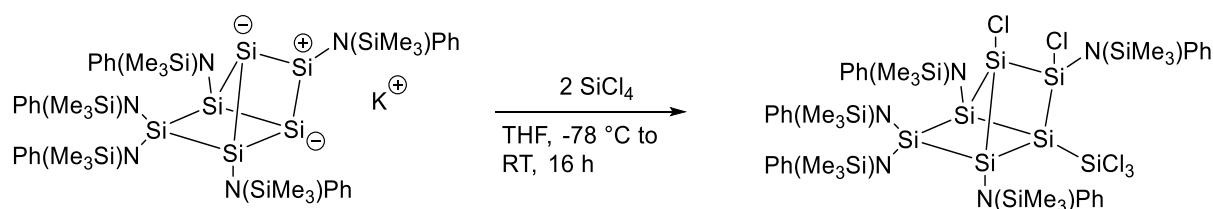

$\text{K}[\text{Si}_6\{\text{N}(\text{SiMe}_3)\text{Ph}\}_5]$  (0.148 g, 0.14 mmol, 1.0 equiv.) was dissolved in THF (10 mL) and  $\text{SiCl}_4$  (0.1 M in *n*-hexane, 2.8 mL, 0.28 mmol, 2.0 equiv.) was added at  $-78\text{ }^\circ\text{C}$ . The reaction mixture was allowed to warm to room temperature and was stirred for 16 h. All volatile components were removed in vacuo and the yellow residue was extracted with benzene (5 mL). Storage of the benzene solution at room temperature resulted in  $[\text{Si}_6\{\text{N}(\text{SiMe}_3)\text{Ph}\}_5\text{Cl}_2\text{SiCl}_3]$  (**5**) (0.037 g, 0.03 mmol, 22 %) as pale yellow crystals.

**$^1\text{H-NMR}$**  ( $\text{C}_6\text{D}_6$ , 300 K, 400 MHz):  $\delta(\text{ppm}) = 7.49 - 7.46$  (2H, m);  $7.31 - 7.28$  (2H, m);  $7.25 - 7.20$  (8H, m);  $7.12 - 7.10$  (3H, m);  $7.08 - 7.03$  (2H, m);  $7.01 - 6.69$  (3H, m);  $6.95 - 6.91$  (1H, m);  $6.88 - 6.84$  (1H, m);  $6.65 - 6.62$  (2H, m);  $0.49$  (9H, s);  $0.34$  (9H, s);  $0.31$  (9H, s);  $0.15$  (9H, s);  $0.02$  (9H, s).

**$^{13}\text{C-NMR}$**  ( $\text{C}_6\text{D}_6$ , 300 K, 100 MHz):  $\delta(\text{ppm}) = 148.9$ ;  $147.7$ ;  $146.5$ ;  $146.5$ ;  $146.5$ ;  $131.6$ ;  $131.6$ ;  $130.9$ ;  $130.2$ ;  $130.1$ ;  $129.8$ ;  $129.7$ ;  $129.6$ ;  $129.5$ ;  $129.4$ ;  $125.8$ ;  $125.6$ ;  $125.1$ ;  $125.0$ ;  $125.0$ ;  $3.3$ ;  $3.1$ ;  $2.7$ ;  $2.6$ ;  $1.3$ .

**$^{15}\text{N}, ^1\text{H-HMBC-NMR}$**  ( $\text{C}_6\text{D}_6$ , 300 K, 41 MHz):  $\delta(\text{ppm}) = 87$ ;  $84$ ;  $82$ ;  $27$ ;  $26$ .

**$^{29}\text{Si}(\text{DEPT } 19.5)\text{-NMR}$**  ( $\text{C}_6\text{D}_6$ , 300 K, 80 MHz):  $\delta(\text{ppm}) = 12.3$ ;  $11.2$ ;  $9.3$ ;  $6.0$ ;  $5.4$ .

**$^{29}\text{Si}\{^1\text{H}\}\text{IG-NMR}$**  ( $\text{C}_6\text{D}_6$ , 300 K, 80 MHz):  $\delta(\text{ppm}) = 33.3$ ;  $16.7$ ;  $13.8$ ;  $12.3$ ;  $11.2$ ;  $9.3$ ;  $6.0$ ;  $5.4$ ;  $-35.3$ ;  $-39.1$ ;  $-52.5$ ;  $-121.7$ .

**IR** (KBr pellet,  $\tilde{\nu}/\text{cm}^{-1}$  (intensity)) =  $451(\text{vw})$ ,  $476(\text{w})$ ,  $517(\text{m})$ ,  $559(\text{m})$ ,  $588(\text{w})$ ,  $611(\text{w})$ ,  $679(\text{m})$ ,  $700(\text{m})$ ,  $754(\text{w})$ ,  $839(\text{vs})$ ,  $872(\text{vs})$ ,  $897(\text{m})$ ,  $959(\text{vs})$ ,  $1028(\text{w})$ ,  $1071(\text{vw})$ ,  $1169(\text{w})$ ,  $1196(\text{s})$ ,  $1251(\text{s})$ ,  $1404(\text{vw})$ ,  $1481(\text{s})$ ,  $1589(\text{w})$ ,  $1655(\text{w})$ ,  $1682(\text{vw})$ ,  $2376(\text{vw})$ ,  $2895(\text{w})$ ,  $2955(\text{w})$ ,  $3030(\text{vw})$ ,  $3059(\text{vw})$ .

**ESI-MS**:  $m/z = 1029.08$   $[\text{Si}_6\{\text{N}(\text{SiMe}_3)\text{Ph}\}_4\text{Cl}_2\text{SiCl}_3]^+$ .

**UV-Vis**: (*n*-hexane,  $c = 1.24 \cdot 10^{-5}$  mol/L,  $\epsilon/\text{L} \cdot \text{mol}^{-1} \cdot \text{cm}^{-1}$ ):  $\lambda = 236$  nm (68750);  $302$  (12416).

**Melting point**:  $250\text{ }^\circ\text{C}$ , decomposition forming a red solid, melting at  $270\text{ }^\circ\text{C}$ .

| Elemental Analysis for $\text{C}_{45}\text{H}_{70}\text{Cl}_5\text{N}_5\text{Si}_{12}$ : | H    | C     | N    |
|------------------------------------------------------------------------------------------|------|-------|------|
| calculated:                                                                              | 5.90 | 45.22 | 5.86 |
| found:                                                                                   | 5.96 | 45.30 | 5.09 |

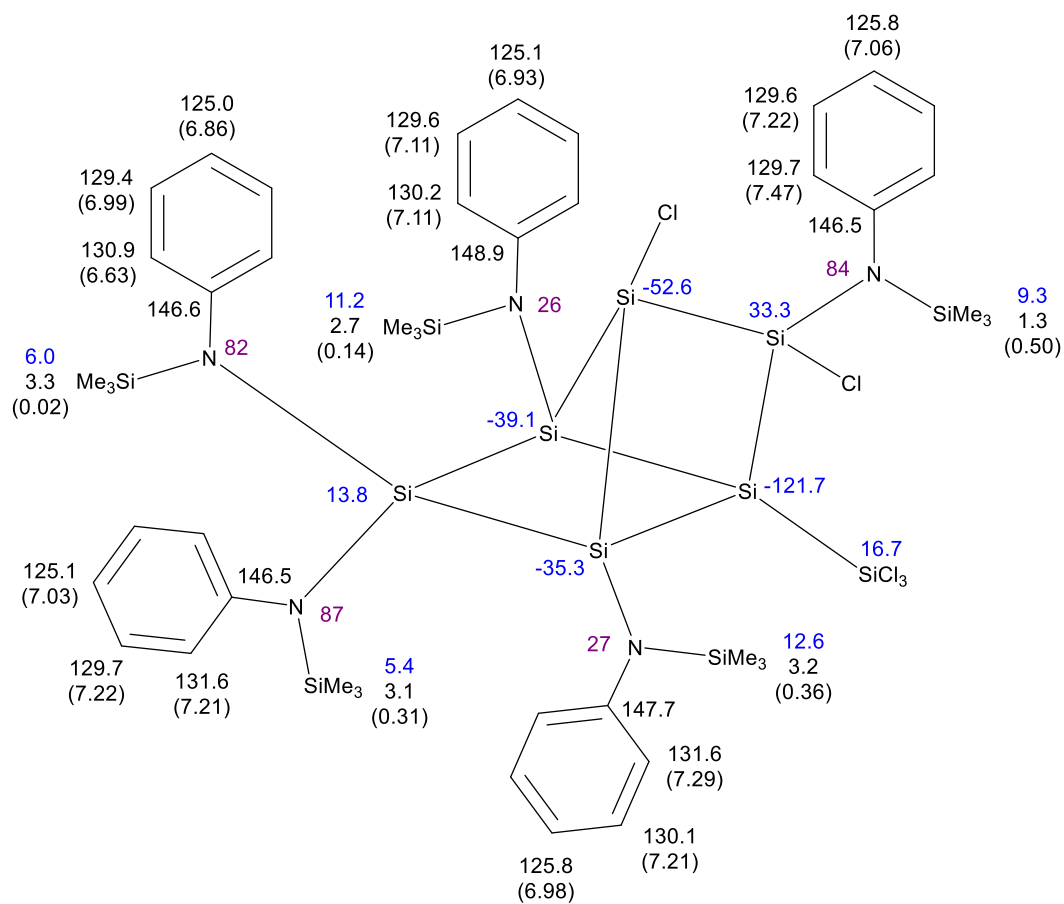

**Figure S44.** Assignment of chemical shifts to **5**,  $^1\text{H}$  (in brackets),  $^{13}\text{C}$  (black),  $^{15}\text{N}$  (violet),  $^{29}\text{Si}$  (blue).

Helm678.10.fid  
Helm678 -  $^1\text{H}$  - NMR -  $\text{C}_6\text{D}_6$  - T=300 K

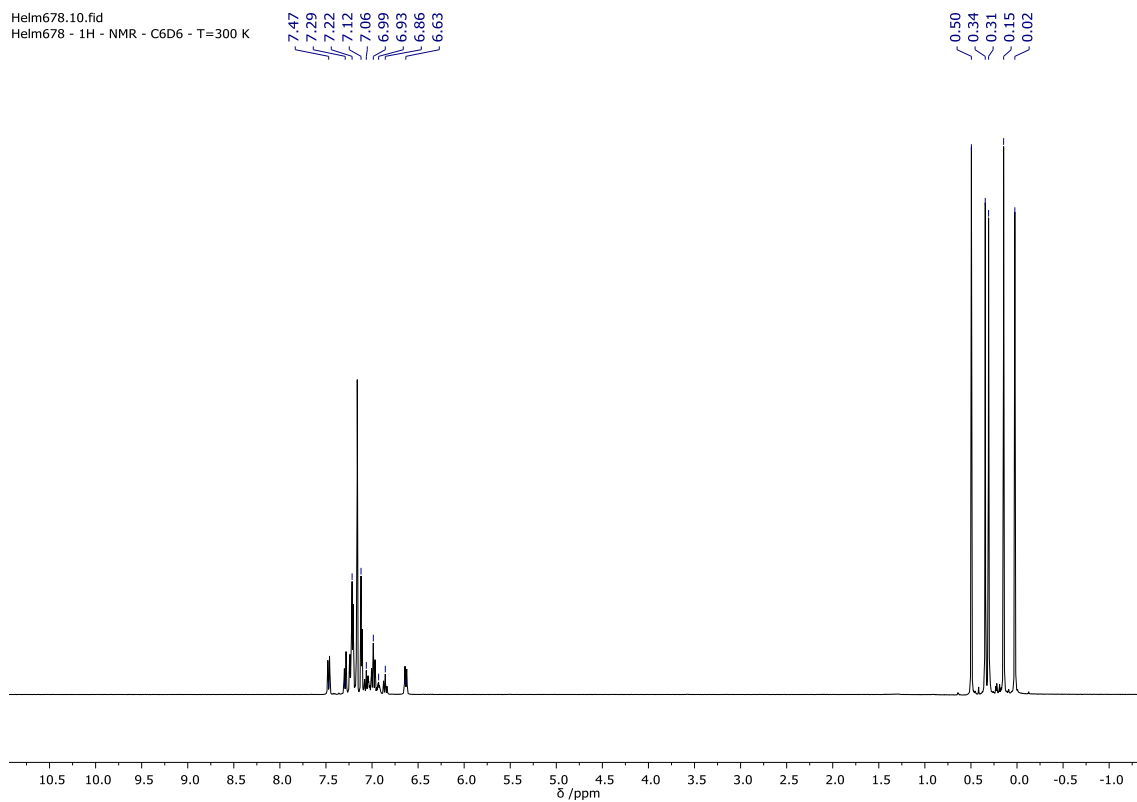

**Figure S45.**  $^1\text{H}$ -NMR spectrum ( $\text{C}_6\text{D}_6$ , 300 K, 400 MHz) of **5**.

Helm678.31.fid  
Helm678 -  $^{13}\text{C}\{^1\text{H}\}$  - NMR -  $\text{C}_6\text{D}_6$  - T=300 K

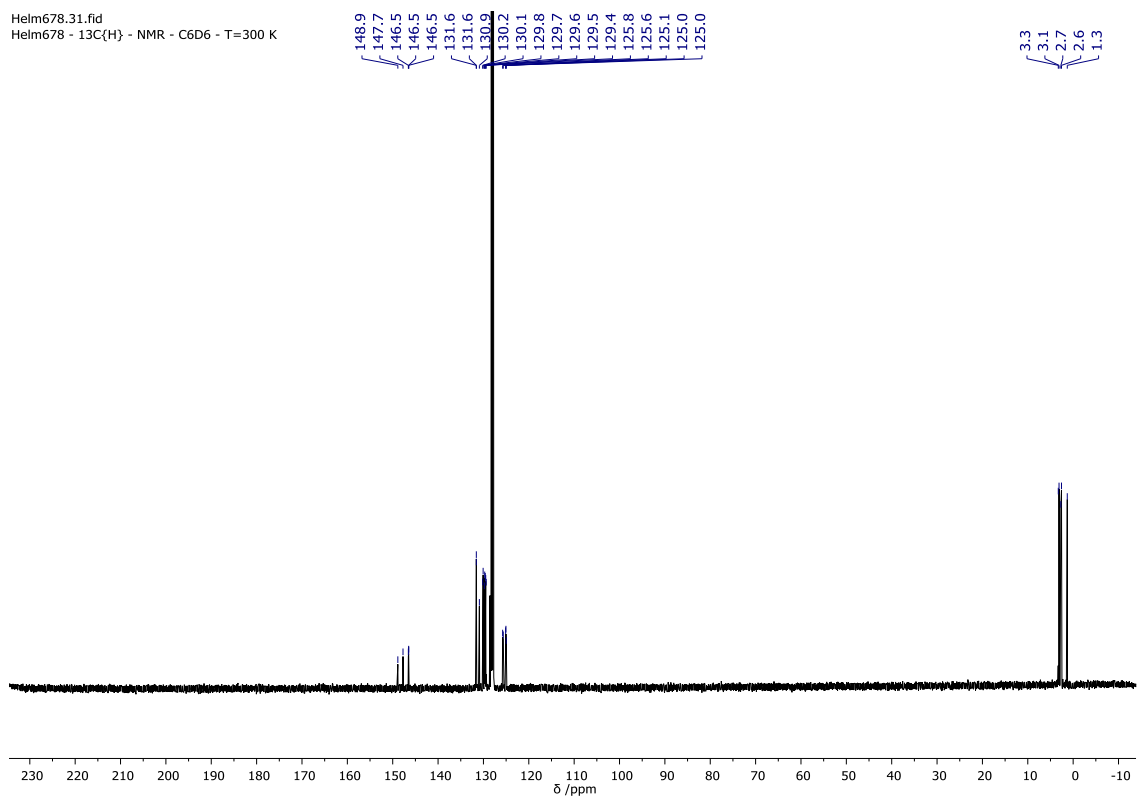

**Figure S46.**  $^{13}\text{C}\{^1\text{H}\}$ -NMR spectrum ( $\text{C}_6\text{D}_6$ , 300 K, 100 MHz) of **5**.



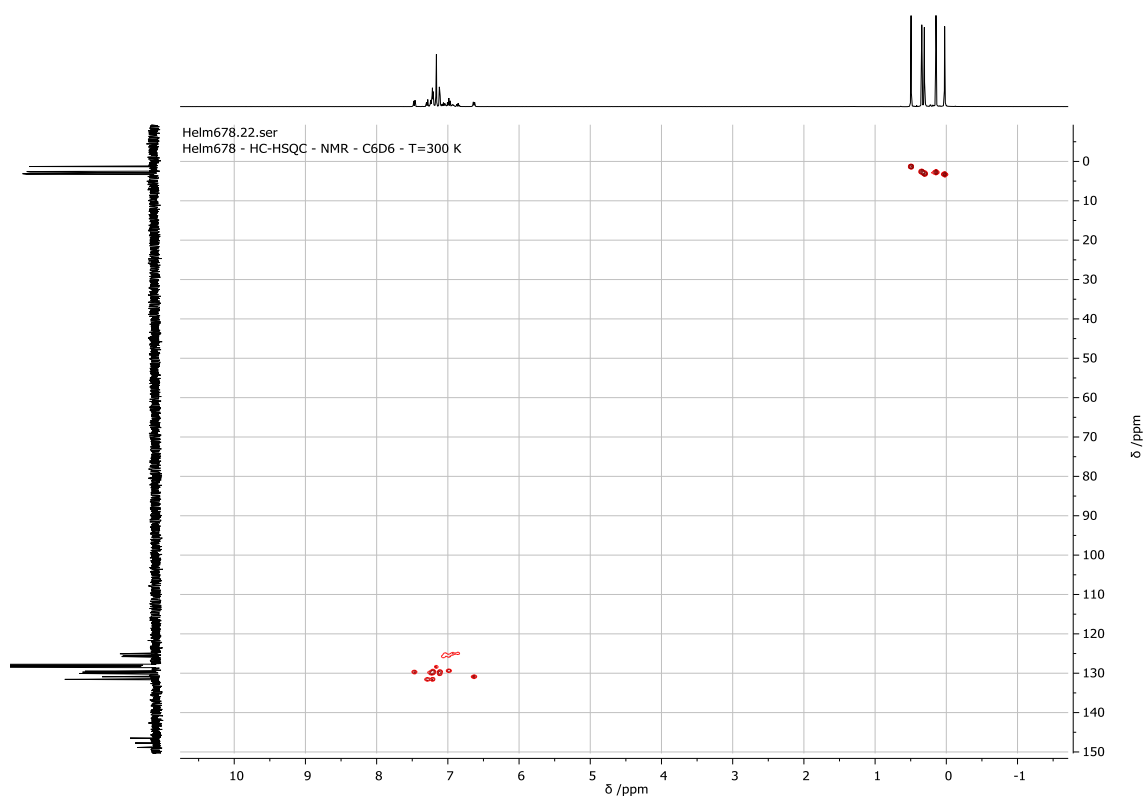

**Figure S47.** H,C-HSQC-NMR spectrum ( $C_6D_6$ , 300 K) of **5**.

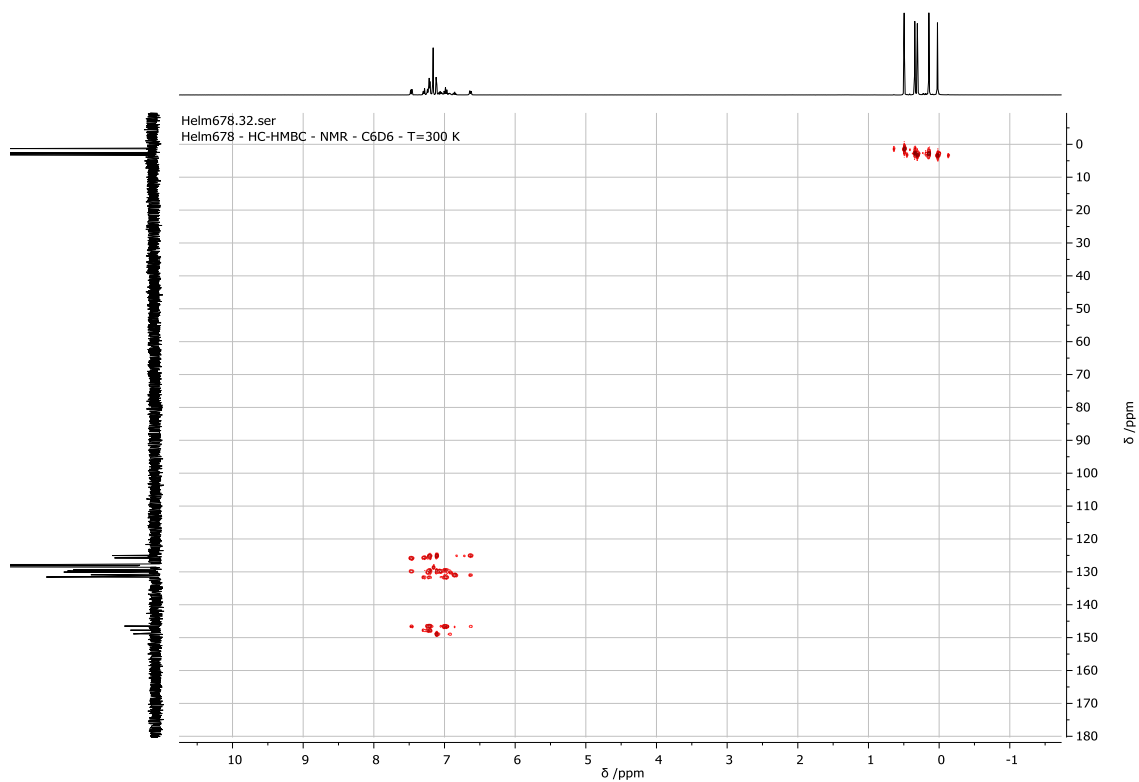

**Figure S48.** H,C-HMBC-NMR spectrum ( $C_6D_6$ , 300 K) of **5**.

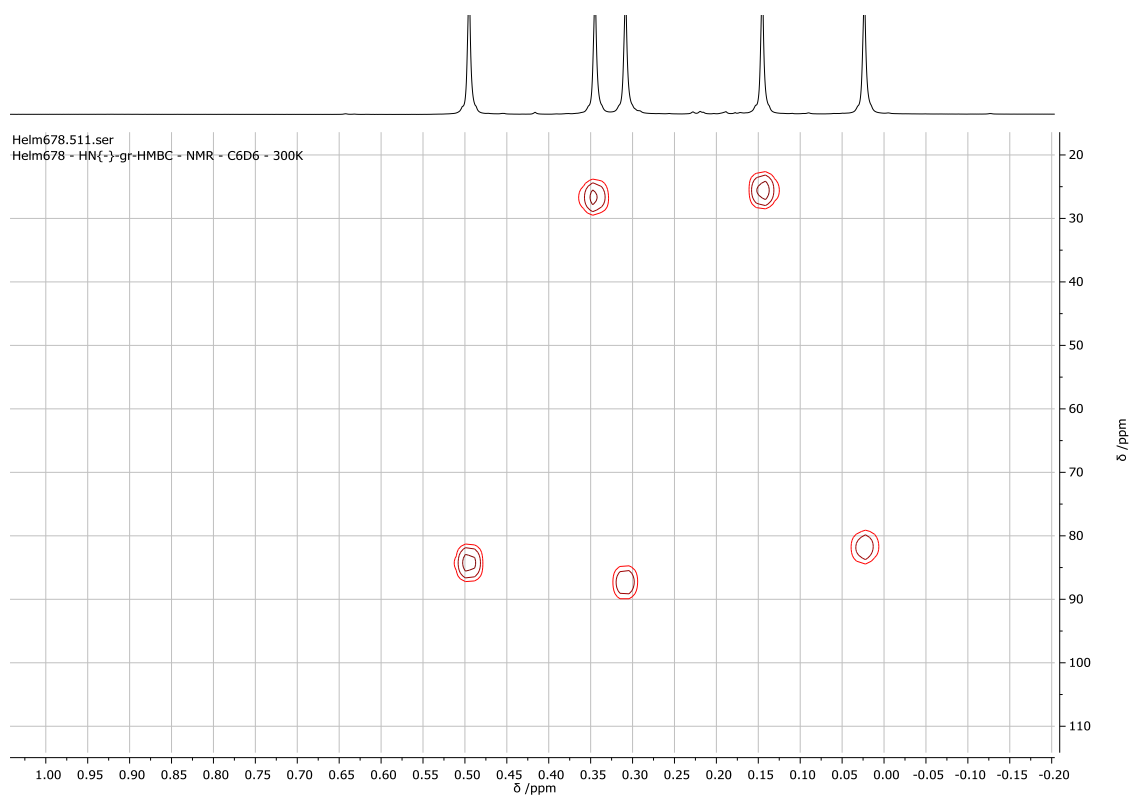

**Figure S49.** H,N-HMBC-NMR spectrum ( $C_6D_6$ , 300 K) of **5**.

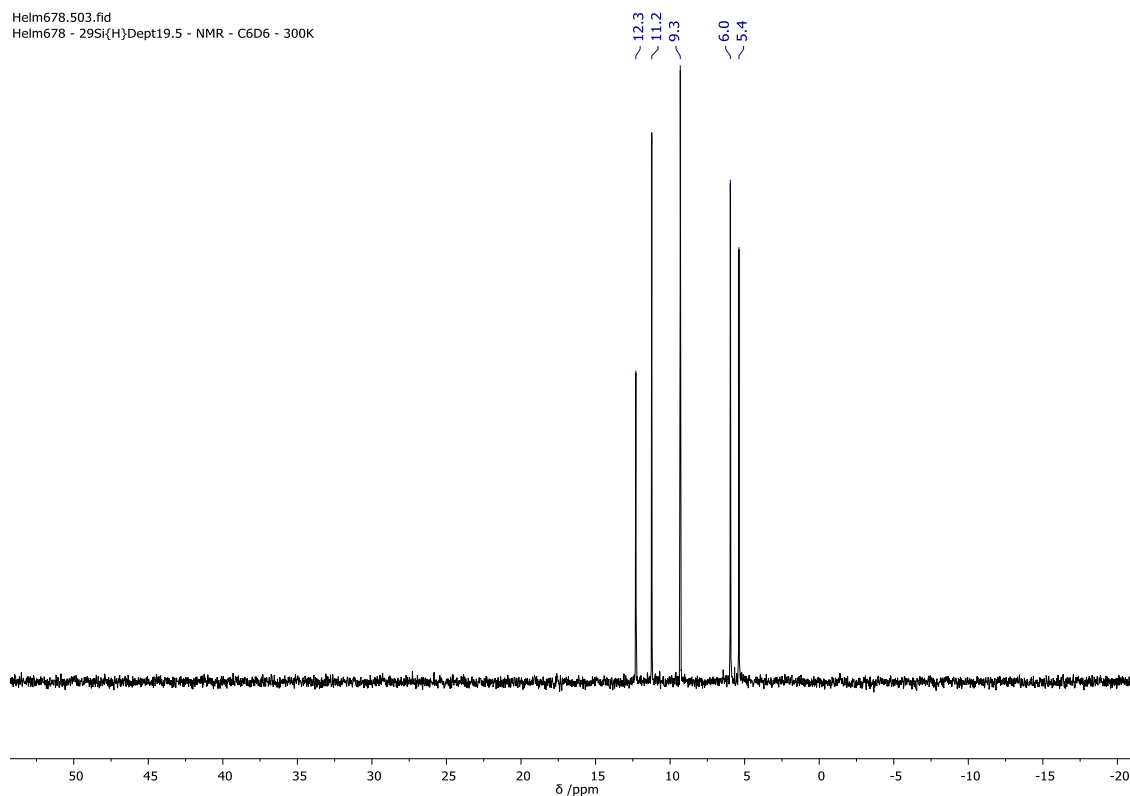

**Figure S50.**  $^{29}Si\{^1H\}$ DEPT19.5-NMR spectrum ( $C_6D_6$ , 300 K, 80 MHz) of **5**.

Helm678.504.fid  
Helm678 -  $^{29}\text{Si}\{^1\text{H}\}$ IG - NMR -  $\text{C}_6\text{D}_6$  - 300K

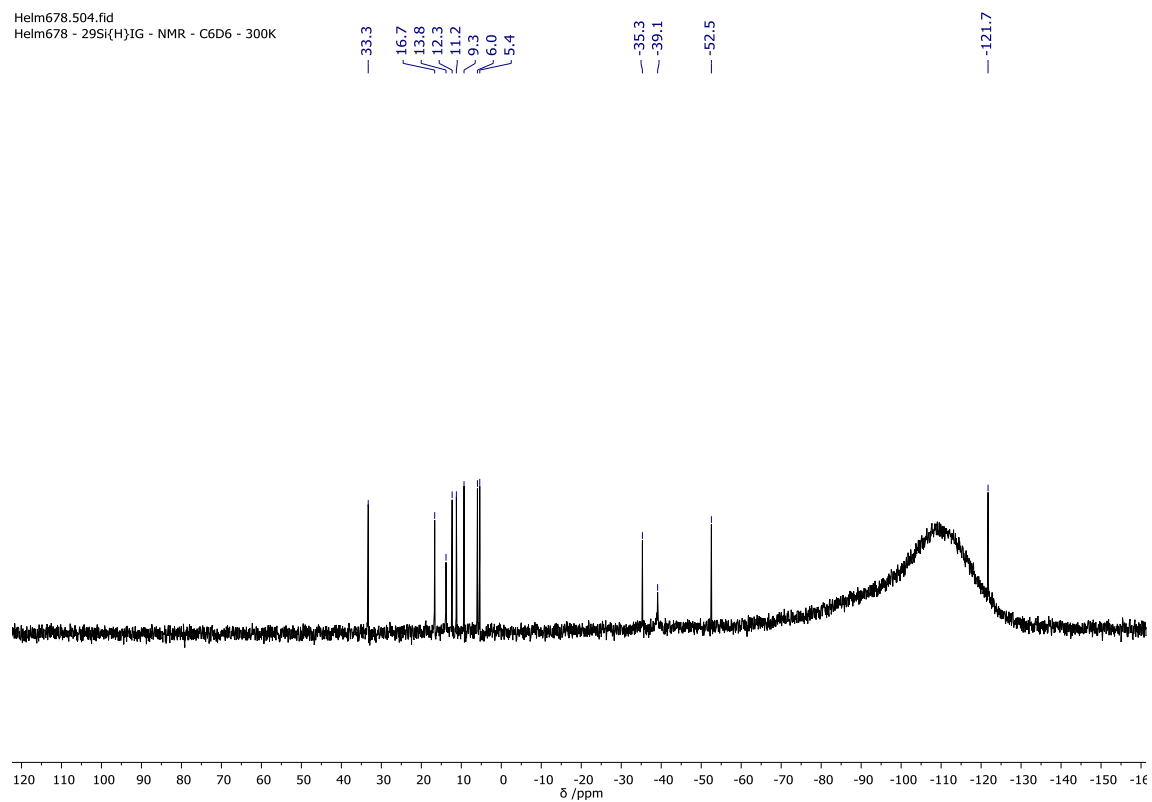

**Figure S51.**  $^{29}\text{Si}\{^1\text{H}\}$ IG-NMR spectrum ( $\text{C}_6\text{D}_6$ , 300 K, 80 MHz) of **5**.

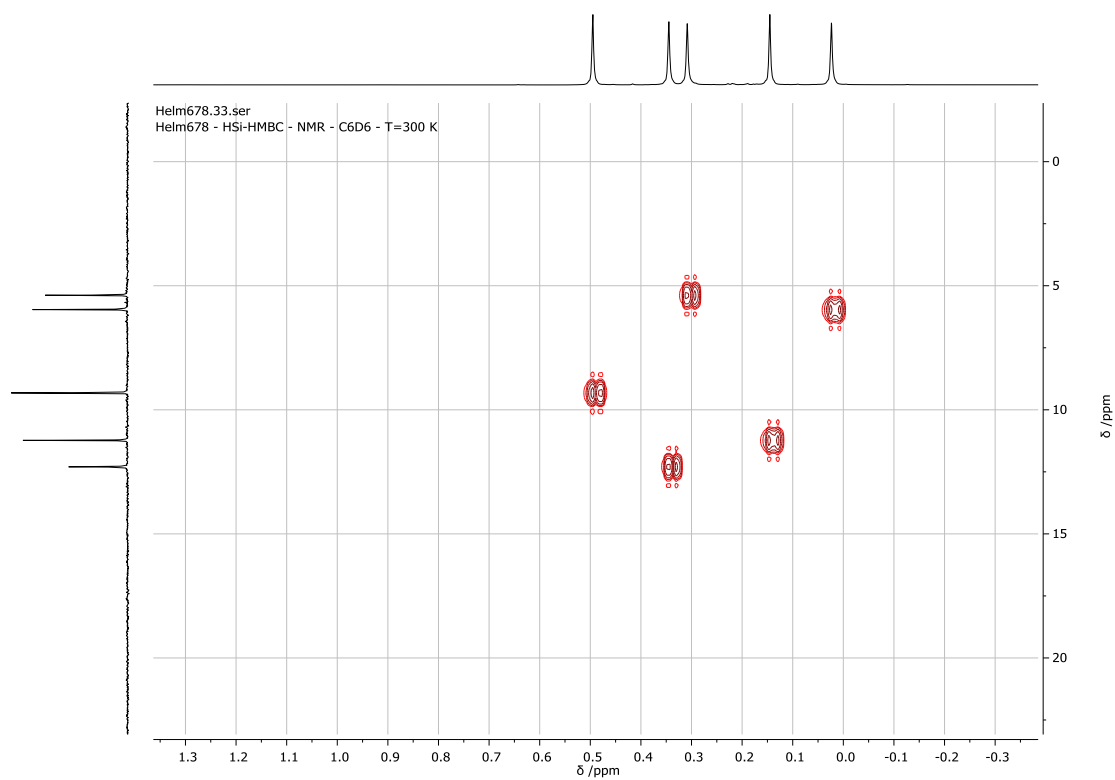

**Figure S52.** H,Si-HMBC-NMR spectrum ( $\text{C}_6\text{D}_6$ , 300 K) of **5**.

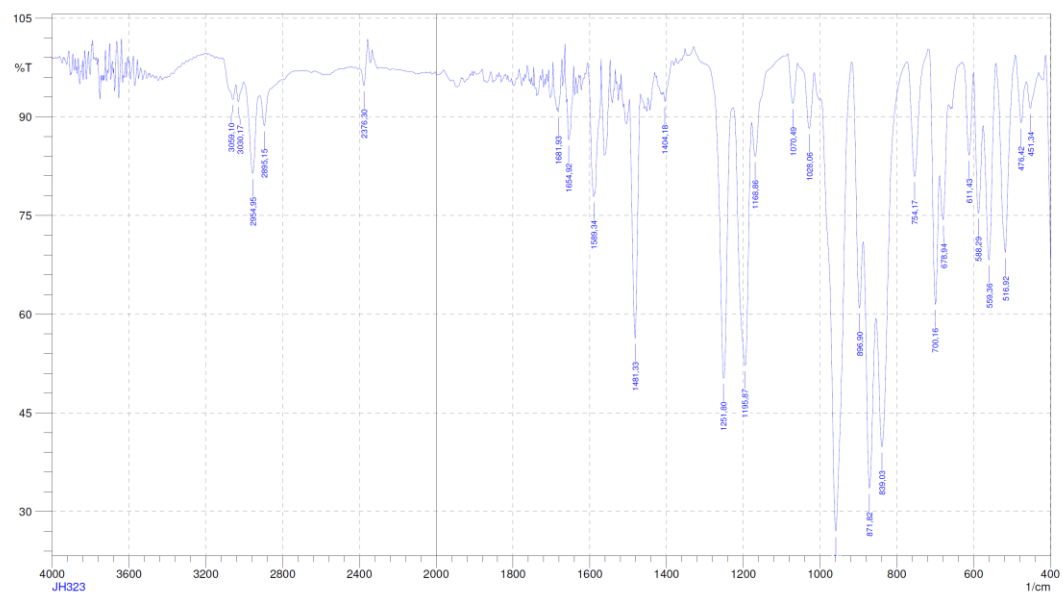

Comment:  
JH323

No. of Scans;

Date/Time; 13.07.2021 13:37:54

D:\Messdaten\Josch\JH323\JH3231.smf

Resolution;  
Apodization;

User; IR-Messung

**Figure S53.** IR spectrum of **5**.

EXT\_0728\_9QU-Helm678 #2-18 RT: 0.02-0.32 AV: 17 NL: 8.10E4  
T: FTMS + p NSI Full ms [150.00-2000.00]

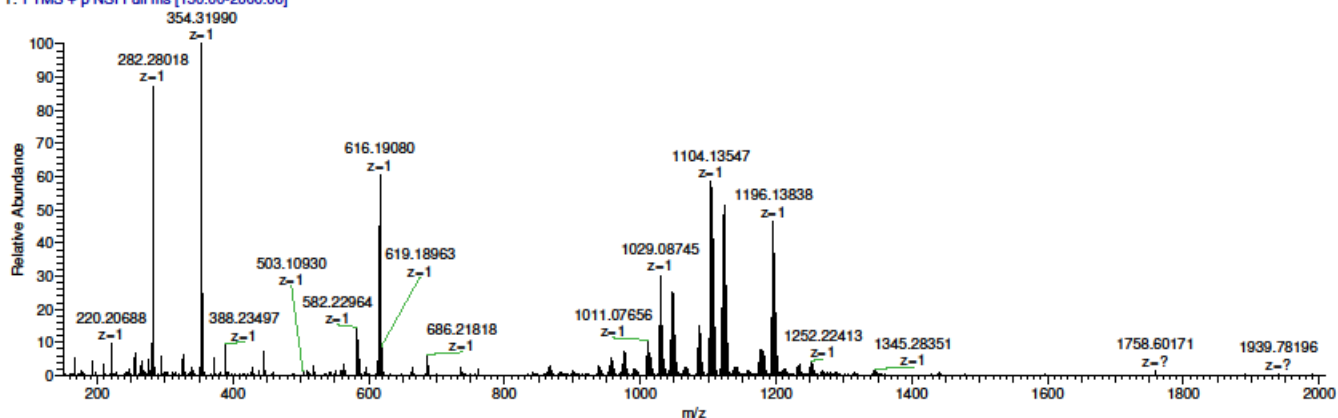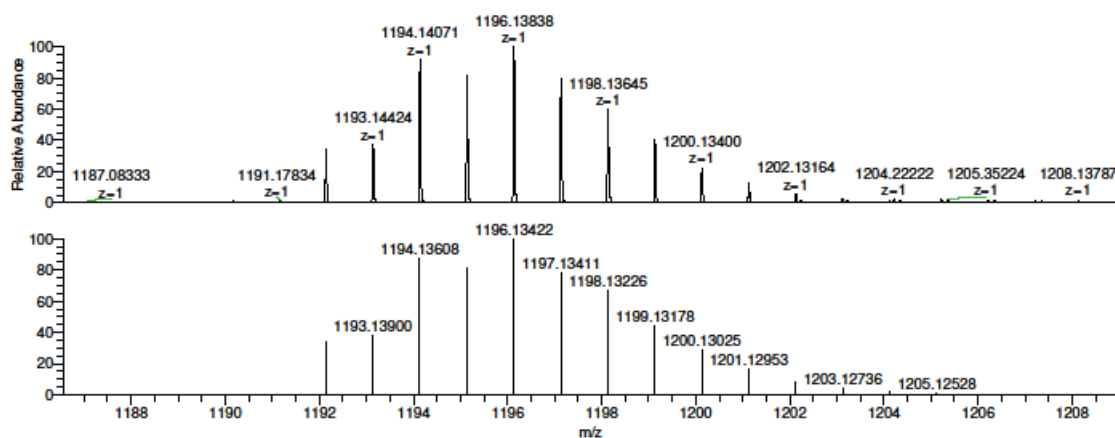

NL:  
3.78E4  
EXT\_0728\_9QU-Helm678#2-  
18 RT: 0.02-0.32 AV: 17 T:  
FTMS + p NSI Full ms  
[150.00-2000.00]

NL:  
1.70E5  
C<sub>45</sub>H<sub>70</sub>N<sub>5</sub>Cl<sub>5</sub>Si<sub>12</sub>H:  
C<sub>45</sub>H<sub>71</sub>N<sub>5</sub>Cl<sub>5</sub>Si<sub>12</sub>  
c (gss, s/p:40)(Val) Chrg 1  
R: 20000 Res. Pwr. @FWHM

Figure S54. ESI-MS spectrum of 5.

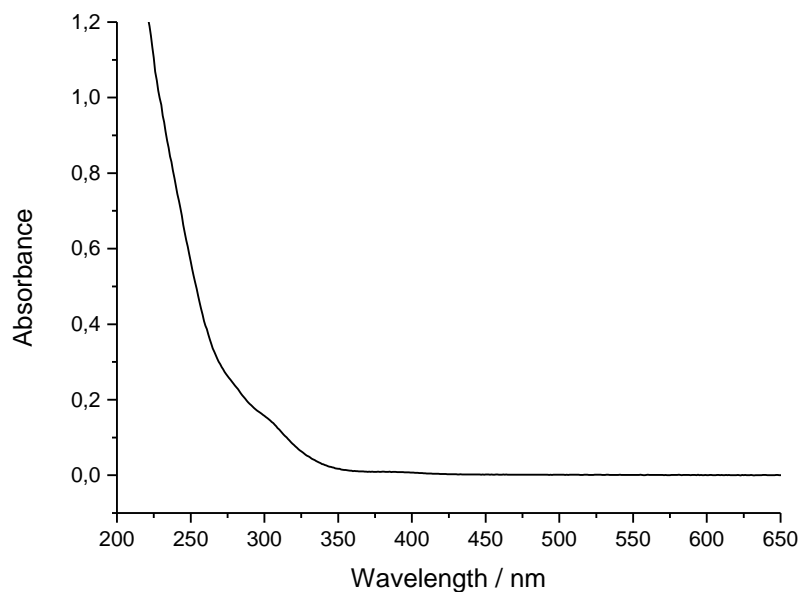

Figure S55. UV-Vis spectrum (*n*-hexane,  $c = 1.24 \cdot 10^{-5}$  mol/L) of 5.

## 2.5 Synthesis of $[\text{Si}_6\{\text{N}(\text{SiMe}_3)\text{Ph}\}_5\text{Br}_2\text{SiBr}_3]$ (**6**)

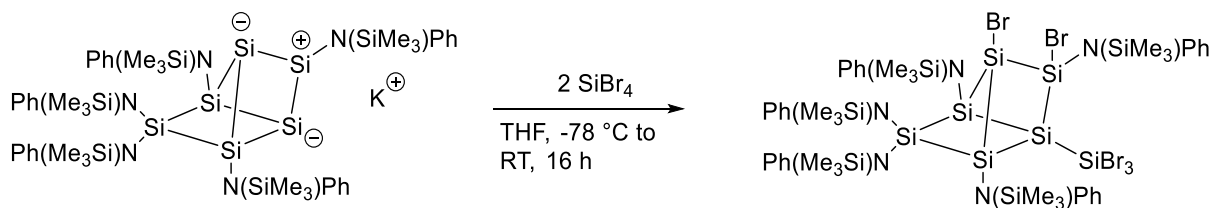

$\text{K}[\text{Si}_6\{\text{N}(\text{SiMe}_3)\text{Ph}\}_5]$  (0.164 g, 0.16 mmol, 1.0 equiv.) was dissolved in THF (10 mL) and  $\text{SiBr}_4$  (0.1 M in *n*-hexane, 3.2 mL, 0.32 mmol, 2.0 equiv.) was added at  $-78$  °C. The reaction mixture was allowed to warm to room temperature and was stirred for 16 h. All volatile components were removed in vacuo and the yellow residue was extracted with benzene (5 mL). Storage at room temperature obtained  $[\text{Si}_6\{\text{N}(\text{SiMe}_3)\text{Ph}\}_5\text{Br}_2\text{SiBr}_3]$  (**6**) (0.025 g, 0.02 mmol, 11 %) as yellow crystals.

**$^1\text{H-NMR}$**  ( $\text{C}_6\text{D}_6$ , 300 K, 400 MHz):  $\delta(\text{ppm}) = 7.53 - 7.51$  (2H, m);  $7.37 - 7.35$  (2H, m);  $7.28 - 7.18$  (8H, m);  $7.14 - 6.97$  (9H, m);  $6.94 - 6.89$  (2H, m);  $6.82 - 6.97$  (2H, m);  $0.52$  (9H, s);  $0.36$  (9H, s);  $0.27$  (9H, s);  $0.18$  (9H, s);  $0.05$  (9H, s).

**$^{13}\text{C-NMR}$**  ( $\text{C}_6\text{D}_6$ , 300 K, 100 MHz):  $\delta(\text{ppm}) = 148.8$ ; 147.5; 146.8; 146.5; 146.4; 131.8; 131.5; 131.4; 130.4; 130.1; 129.9; 129.9; 129.7; 129.5; 129.4; 126.1; 125.7; 125.2; 125.2; 125.1; 3.8; 3.3; 3.3; 3.2; 1.5.

**$^{15}\text{N}, ^1\text{H-HMBC-NMR}$**  ( $\text{C}_6\text{D}_6$ , 300 K, 41 MHz):  $\delta(\text{ppm}) = 86$ ; 83; 83; 26; 26.

**$^{29}\text{Si}(\text{DEPT } 19.5)\text{-NMR}$**  ( $\text{C}_6\text{D}_6$ , 300 K, 80 MHz):  $\delta(\text{ppm}) = 12.8$ ; 11.7; 10.1; 6.1; 5.5.

**$^{29}\text{Si}\{^1\text{H}\}\text{IG-NMR}$**  ( $\text{C}_6\text{D}_6$ , 300 K, 80 MHz):  $\delta(\text{ppm}) = 18.5$ ; 12.8; 11.8; 11.7; 10.1; 6.1; 5.5;  $-19.1$ ;  $-30.9$ ;  $-39.7$ ;  $-69.1$ ;  $-107.9$ .

**IR** (KBr pellet,  $\tilde{\nu}/\text{cm}^{-1}$  (intensity)) = 442(m), 469(vw), 498(vw), 525(m), 556(vw), 610(vw), 662(vw), 696(s), 752(w), 837(vs), 868(vs), 897(m), 957(vs), 1026(vw), 1071(vw), 1167(vw), 1196(vs), 1250(s), 1408(vw), 1445(vw), 1481(s), 1557(w), 1586(w), 1668(vw), 1939(vw), 2895(vw), 2955(w), 3055(vw).

**ESI-MS**:  $m/z = 1250.78$   $[\text{Si}_6\{\text{N}(\text{SiMe}_3)\text{Ph}\}_5\text{Br}_2\text{SiBr}_3]^+$ .

**UV-Vis**: (*n*-hexane,  $c = 1.41 \cdot 10^{-5}$  mol/L,  $\epsilon/\text{L} \cdot \text{mol}^{-1} \cdot \text{cm}^{-1}$ ):  $\lambda = 231$  nm (44282); 313 (5106).

**Melting point**: 260 °C, decomposition forming a red solid, melting at 290 °C.

| <b>Elemental Analysis</b> for $\text{C}_{45}\text{H}_{70}\text{Br}_5\text{N}_5\text{Si}_{12}$ + Benzene: | H    | C     | N    |
|----------------------------------------------------------------------------------------------------------|------|-------|------|
| calculated:                                                                                              | 5.12 | 40.95 | 4.68 |
| found:                                                                                                   | 4.76 | 41.08 | 4.88 |

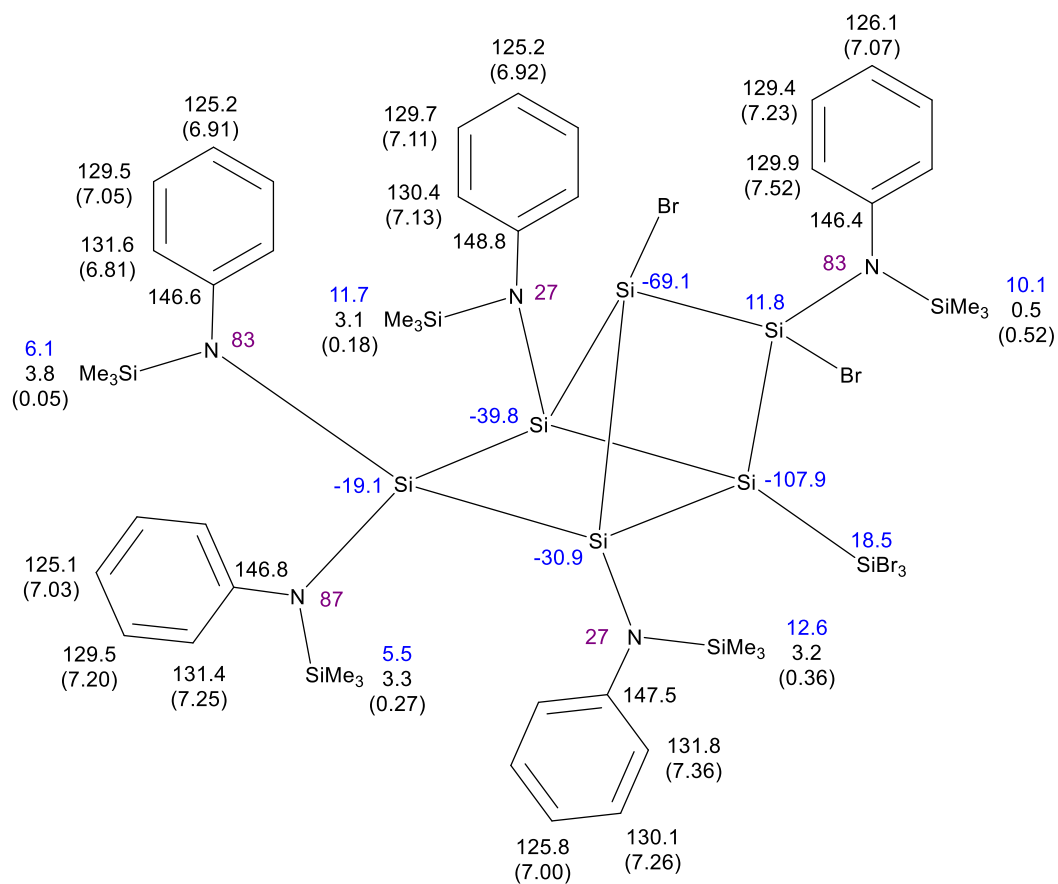

**Figure S56.** Assignment of chemical shifts to **6**,  $^1\text{H}$  (in brackets),  $^{13}\text{C}$  (black),  $^{15}\text{N}$  (violet),  $^{29}\text{Si}$  (blue).

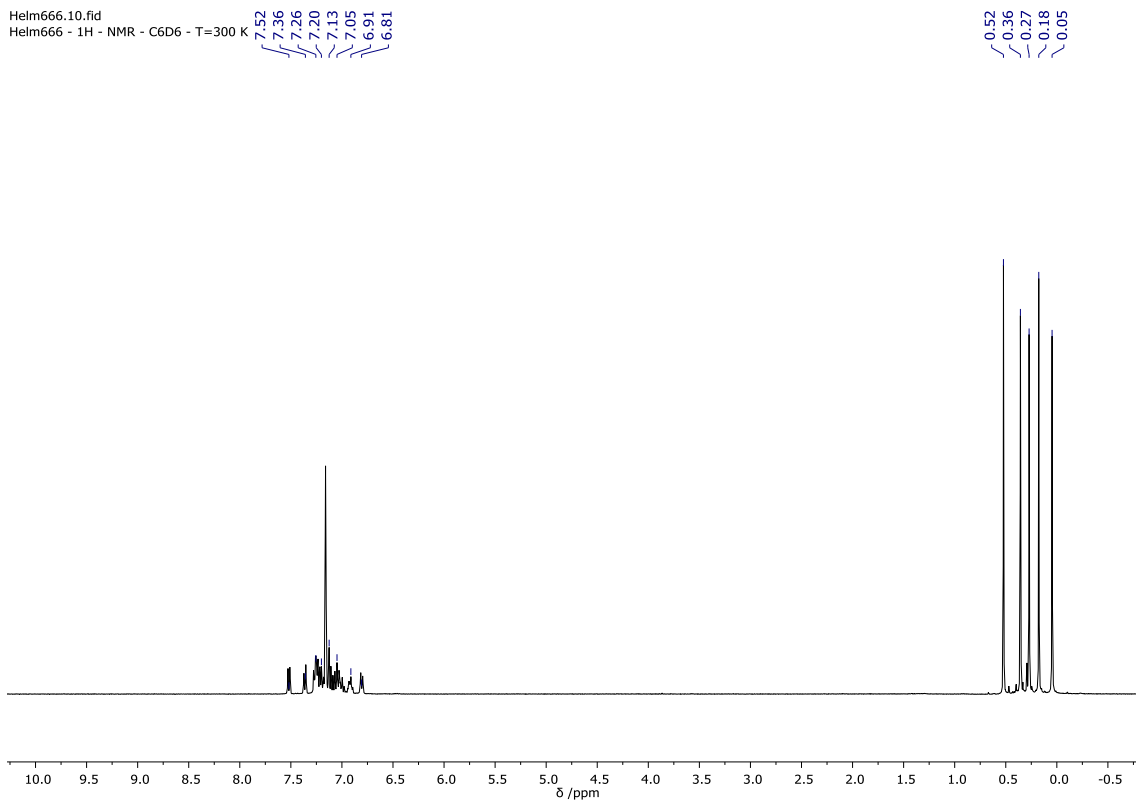

**Figure S57.**  $^1\text{H}$ -NMR spectrum ( $\text{C}_6\text{D}_6$ , 300 K, 400 MHz) of **6**.

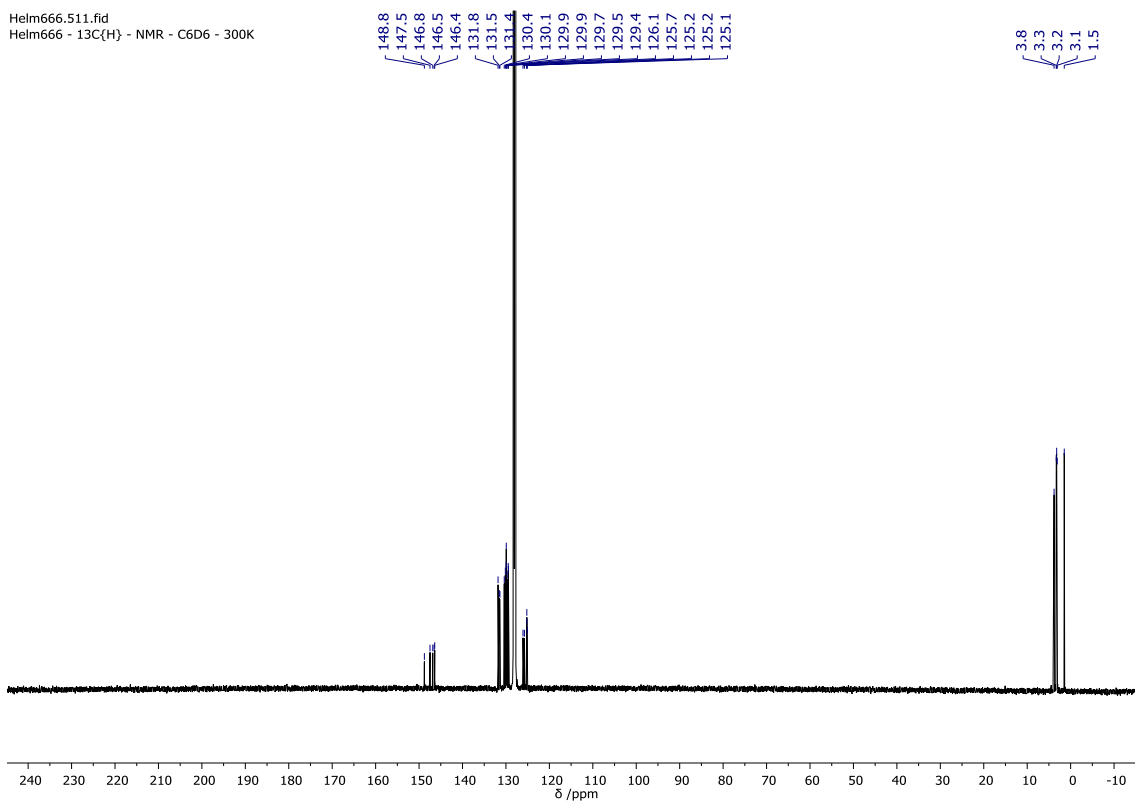

**Figure S58.**  $^{13}\text{C}\{^1\text{H}\}$ -NMR spectrum ( $\text{C}_6\text{D}_6$ , 300 K, 100 MHz) of **6**.



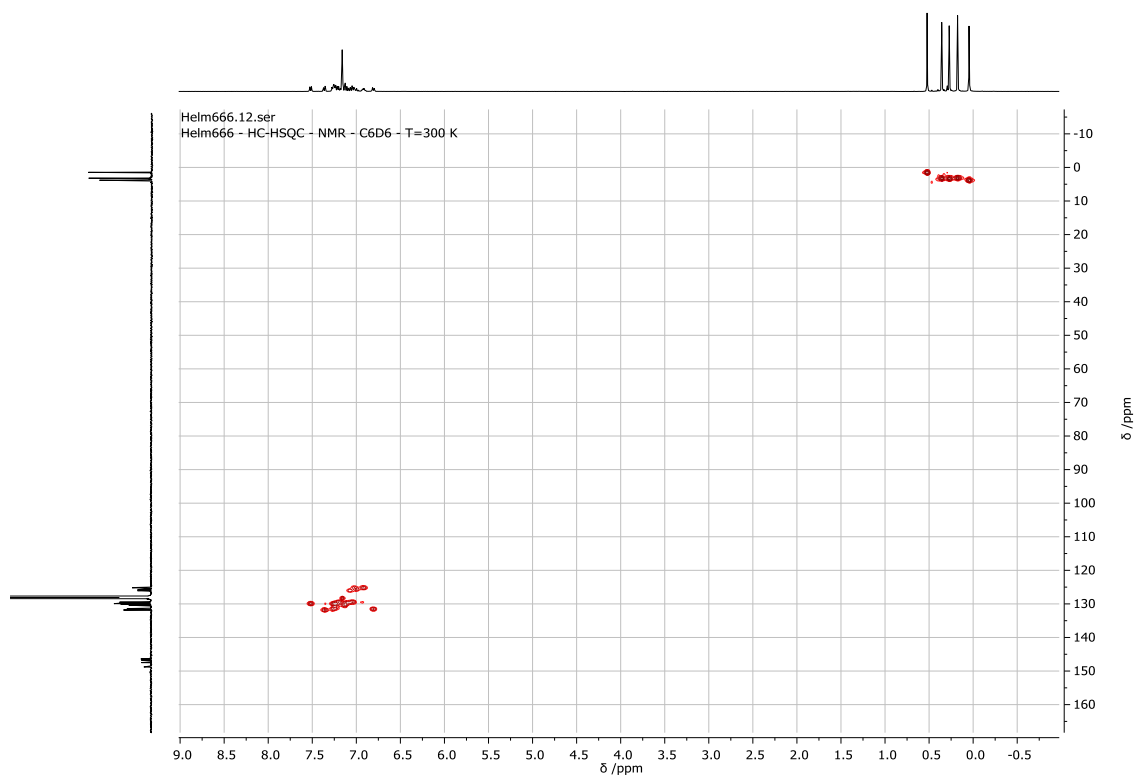

Figure S59. H,C-HSQC-NMR spectrum ( $C_6D_6$ , 300 K) of **6**.

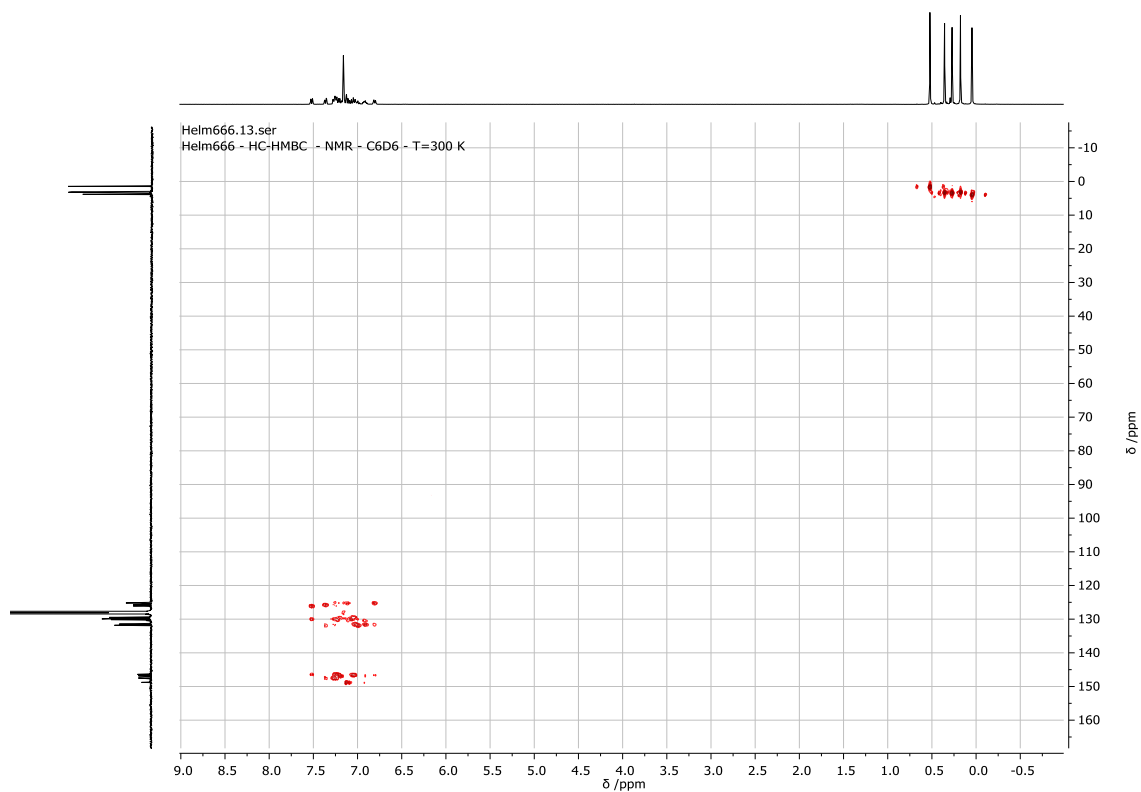

Figure S60. H,C-HMBC-NMR spectrum ( $C_6D_6$ , 300 K) of **6**.

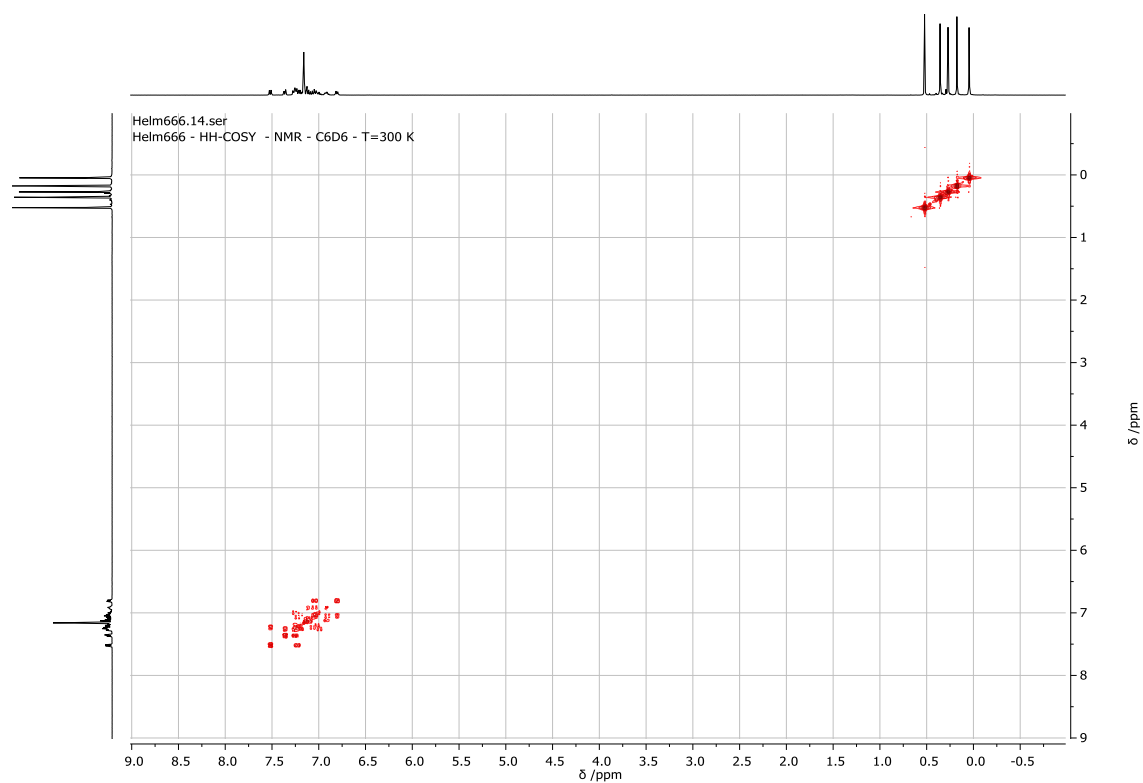

**Figure S61.** H,H-COSY-NMR spectrum ( $C_6D_6$ , 300 K) of **6**.

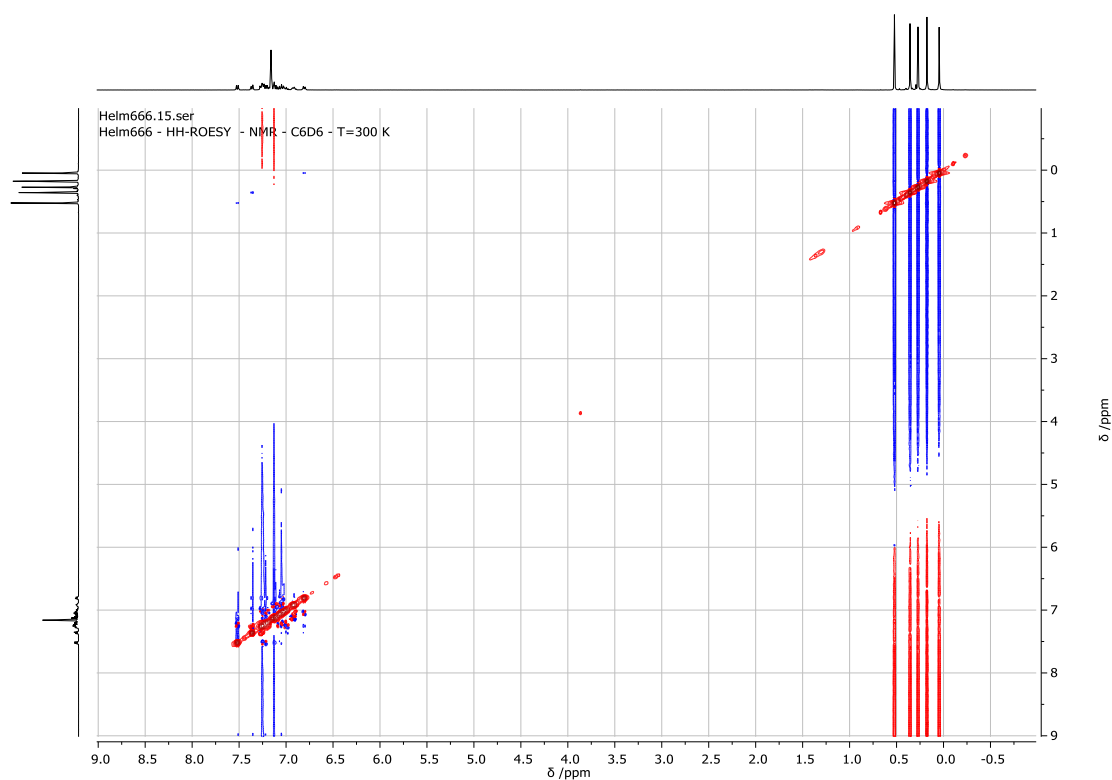

**Figure S62.** H,H-ROESY-NMR spectrum ( $C_6D_6$ , 300 K) of **6**.

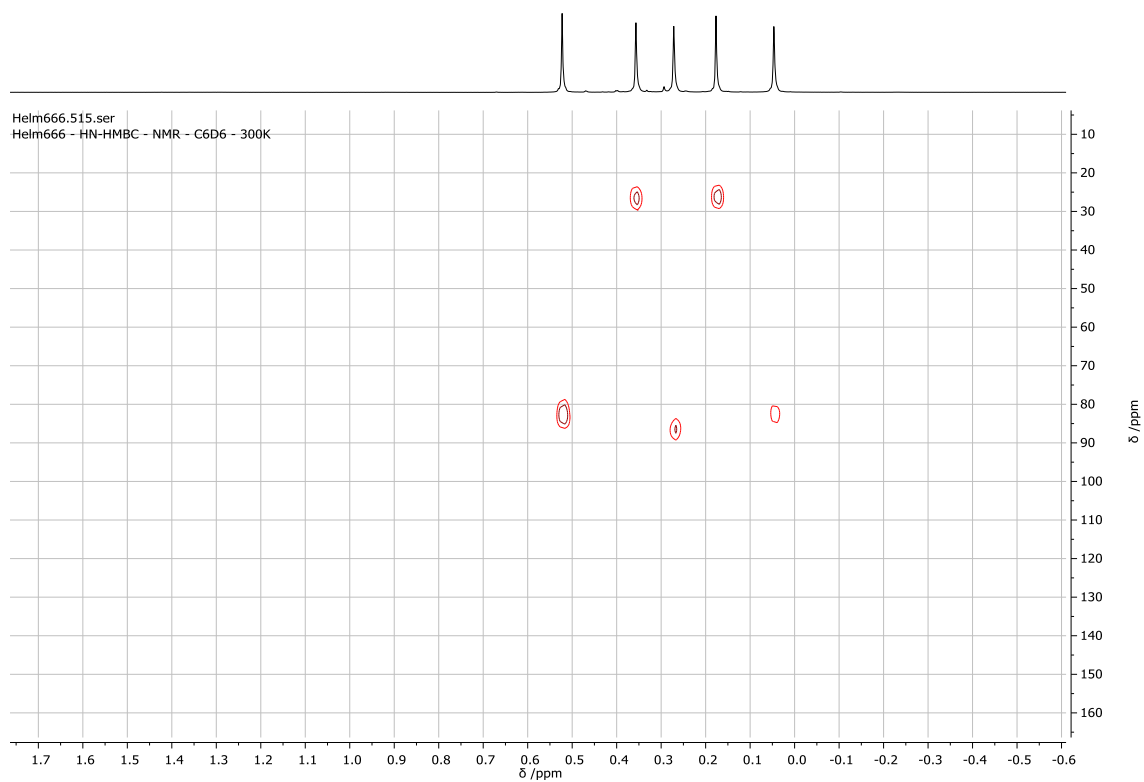

**Figure S63.** H,N-HMBC-NMR spectrum ( $C_6D_6$ , 300 K) of **6**.

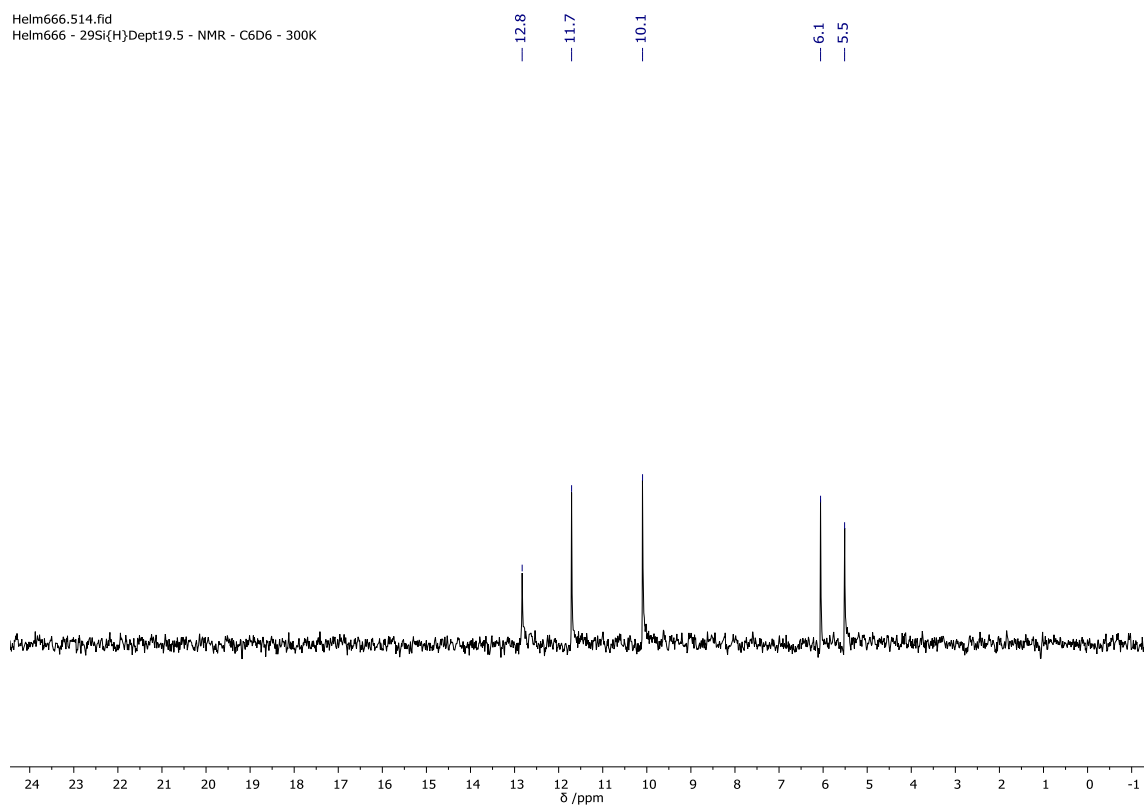

**Figure S64.**  $^{29}Si\{^1H\}$ DEPT19.5-NMR spectrum ( $C_6D_6$ , 300 K, 80 MHz) of **6**.

Helm666.513.fid  
Helm666 - 29Si{1H}IG - NMR - C6D6 - 300K

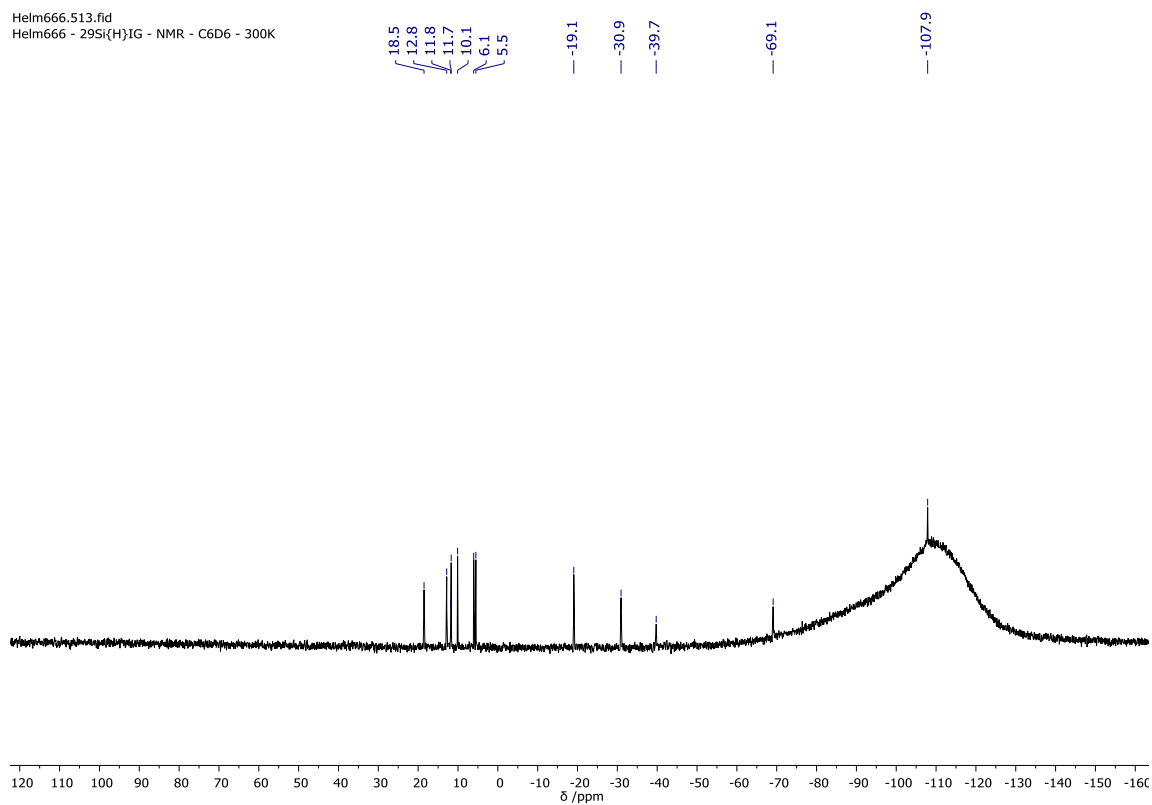

**Figure S65.**  $^{29}\text{Si}\{^1\text{H}\}$ IG-NMR spectrum ( $\text{C}_6\text{D}_6$ , 300 K, 80 MHz) of **6**.

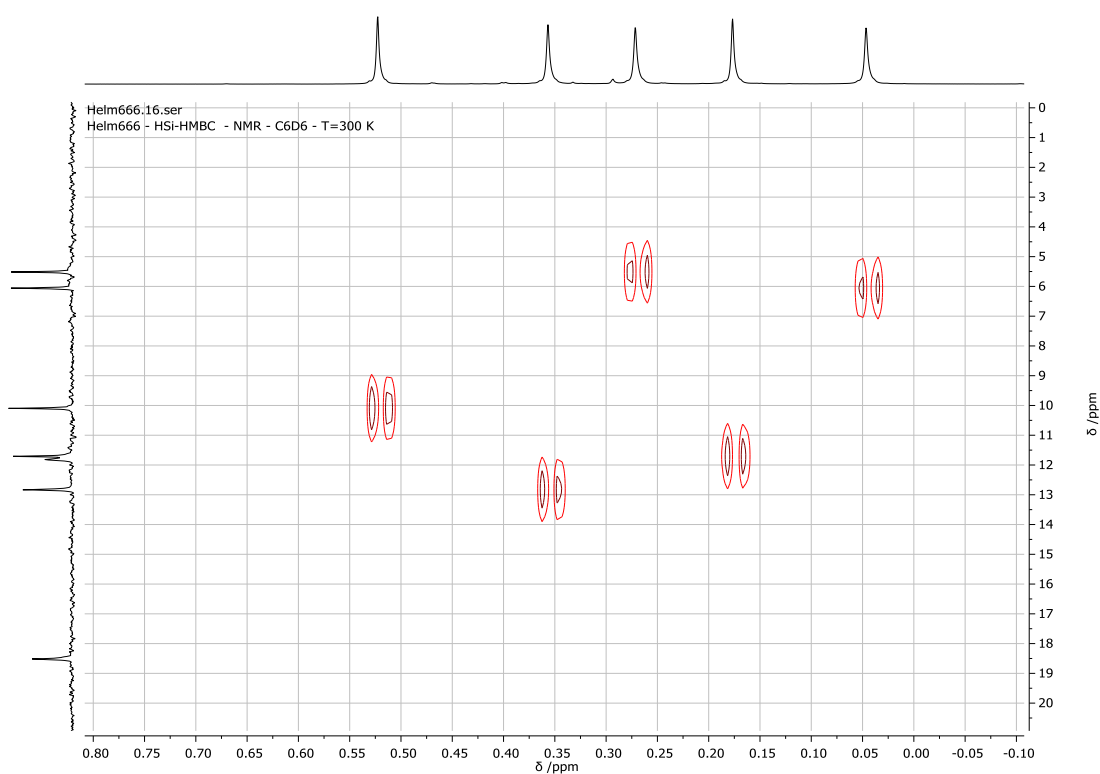

**Figure S66.** H,Si-HMBC-NMR spectrum ( $\text{C}_6\text{D}_6$ , 300 K) of **6**.

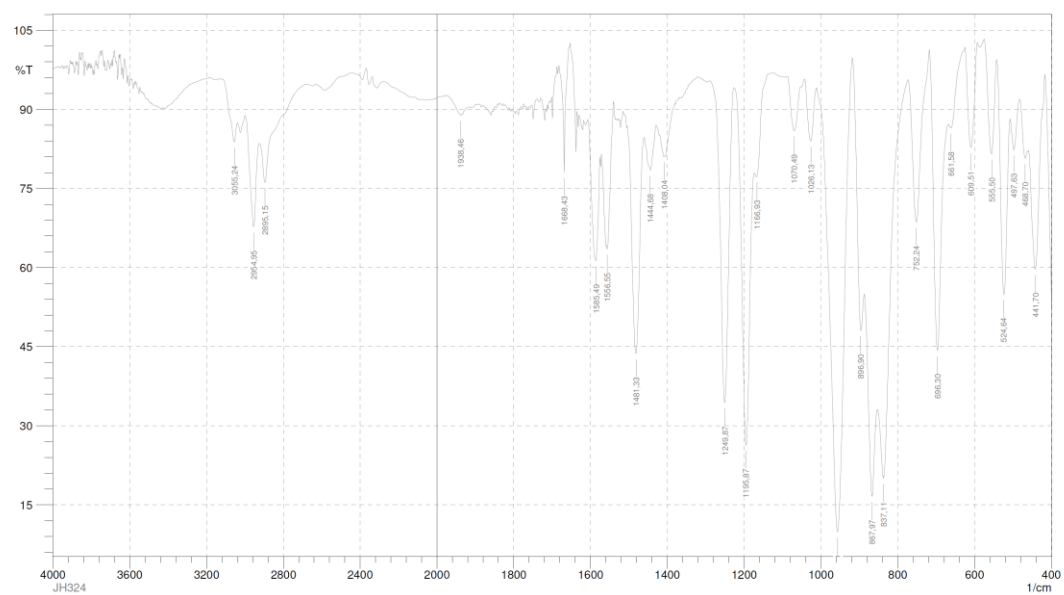

Comment:  
JH324

No. of Scans:

Date/Time: 14.07.2021 14:42:50

D:\Messdaten\Josch\JH324\JH3241.smf

Resolution:  
Apodization:

User: IR-Messung

Figure S67. IR spectrum of **6**.

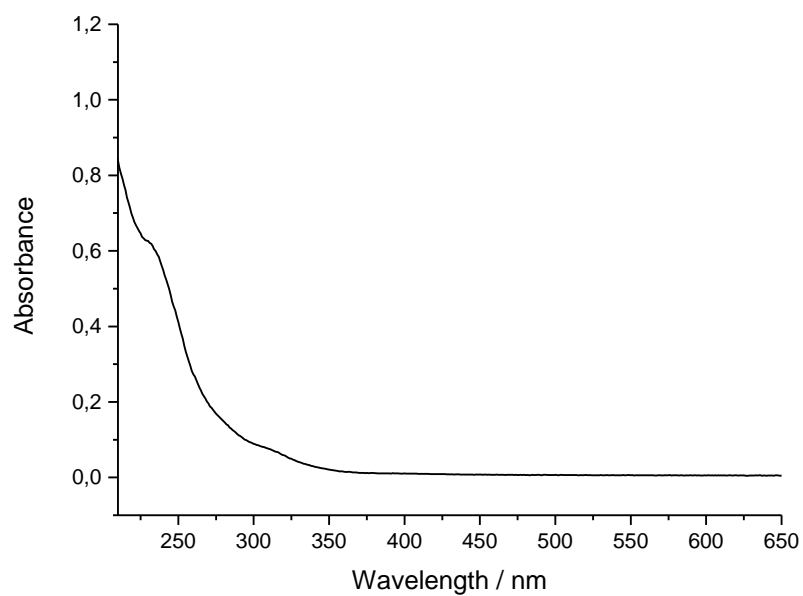

Figure S68. UV-Vis spectrum (*n*-hexane,  $c = 1.41 \cdot 10^{-5}$  mol/L) of **6**.

EXT\_0728\_9QU-Helm666\_220728142213 #2-20 RT: 0.02-0.32 AV: 19 NL: 4.08E5  
T: FTMS + p NSI Full ms [150.00-2000.00]

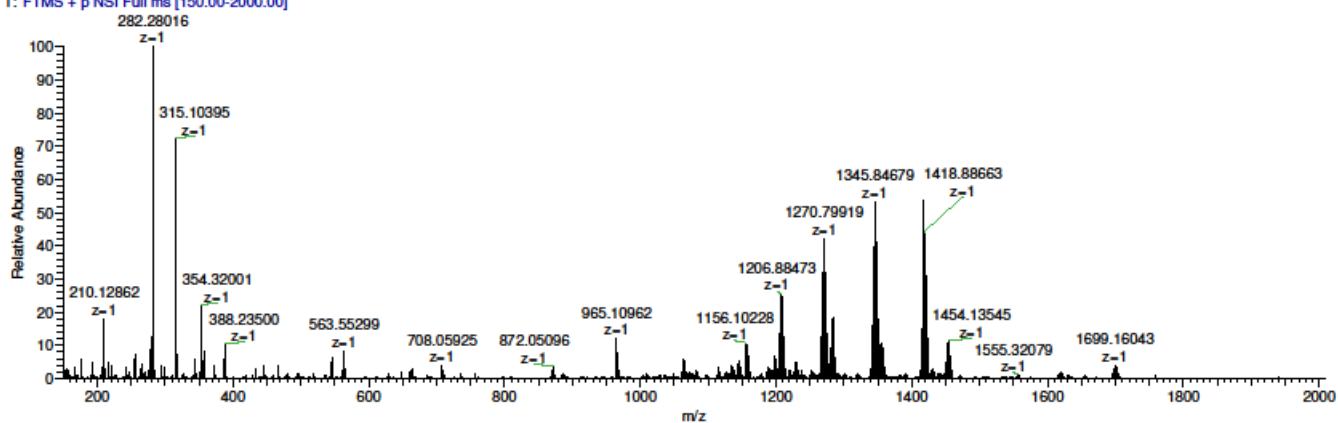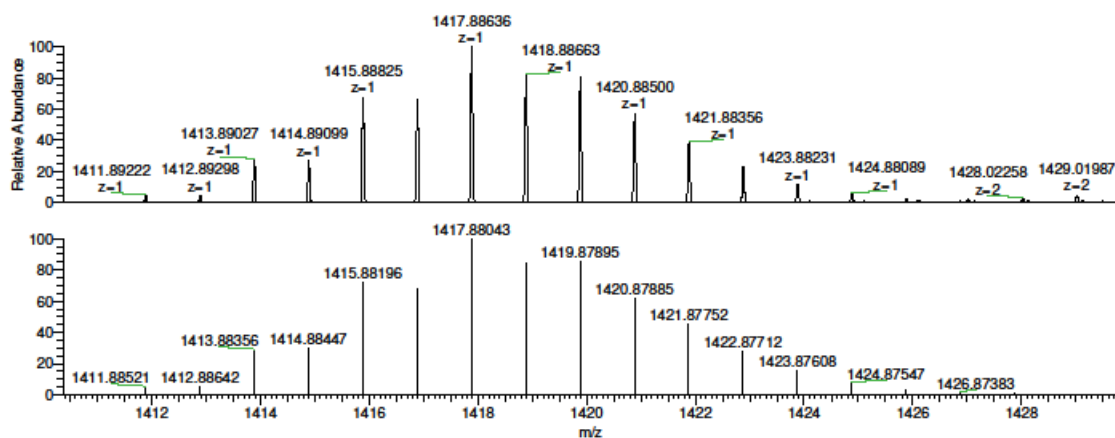

NL:  
2.19E5  
EXT\_0728\_9QU-  
Helm666\_220728142213#2-  
20 RT: 0.02-0.32 AV: 19 T:  
FTMS + p NSI Full ms  
[150.00-2000.00]

NL:  
1.57E5  
C<sub>45</sub> H<sub>70</sub> N<sub>5</sub> Br<sub>5</sub> Si<sub>12</sub> H:  
C<sub>45</sub> H<sub>71</sub> N<sub>5</sub> Br<sub>5</sub> Si<sub>12</sub>  
c (gss, s/p:40)(Val) Chrg 1  
R: 20000 Res. Pwr. @FWHM

Figure S69. ESI-MS spectrum of 6.

### 3. Details of the single crystal X-ray diffraction analysis

Crystals of **2**, **3**(·solvent), **4**(·0.5C<sub>6</sub>D<sub>6</sub>), **5**(·C<sub>6</sub>D<sub>6</sub>) and **6** were removed from a Schlenk tube under an argon atmosphere and covered with a layer of hydrocarbon oil. A suitable crystal was selected, attached to a glass fiber and quickly placed in a low temperature Argon stream. The data were collected at 100 K on a Bruker Venture with Mo K<sub>α</sub> radiation ( $\lambda = 0.71073 \text{ \AA}$ ), except **2** which was collected with Cu K<sub>α</sub> radiation ( $\lambda = 1.54178 \text{ \AA}$ ) with the same instrument and temperature. The crystal structures were solved by direct methods using SHELX version 6.1 program package.<sup>[S2]</sup> Non-hydrogen atoms were refined anisotropically. Absorption corrections were applied using SADABS program (*SADABS*, an empirical absorption correction program, part of the SAINTplus NT version 5.0 package; Bruker AXS: Madison, WI 1998). Data collected were corrected for Lorentz and polarization effects with Saint<sup>[S2]</sup> and absorption using Blessing's method and merged as incorporated with the program.<sup>[S3,S4]</sup> The SHELXTL<sup>[S5]</sup> program package was now implemented to determine the space group based upon intensity statistics. The structure was determined by direct methods with a majority of the non-hydrogen atoms from the molecule of interest being located directly using the program XT.<sup>[S6]</sup> Refinement of the structure was achieved using the program XL.<sup>[S7]</sup> Difference-Fourier least-squares refinement cycles were required to locate the remaining non-hydrogen atoms.

#### 3.1. Refinement details

For **2**, **3**(·solvent), **4**(·0.5C<sub>6</sub>D<sub>6</sub>), **5**(·C<sub>6</sub>D<sub>6</sub>) and **6** the refinements were performed in the following manner. Compound **2** has one disordered K atom and one disordered phenyl groups next to a symmetry element. The later was refined using PART instructions resulting in 50% occupancy for each part. Compound **3**(·solvent) has one disordered THF molecule per asymmetric unit that was refined with the PLATON SQUEEZE routine.<sup>[S8]</sup> Compound **4**(·0.5C<sub>6</sub>D<sub>6</sub>) was refined without using constraints or restraints and two reflexes were omitted. Compound **5**(·C<sub>6</sub>D<sub>6</sub>) was refined without using constraints or restraints and six reflexes were omitted. Compound **6** was refined without using constraints or restraints and one reflex was omitted.

**Table S1.** Crystal data and structure refinement for **2**, **3**(·solvent) and **4**(·0.5C<sub>6</sub>H<sub>6</sub>).

| <b>Compound</b>                                             | <b>2</b>                                                         | <b>3(·solvent)</b>                                                               | <b>4(·0.5C<sub>6</sub>H<sub>6</sub>)</b>                         |
|-------------------------------------------------------------|------------------------------------------------------------------|----------------------------------------------------------------------------------|------------------------------------------------------------------|
| <b>CCDC number</b>                                          | <b>2154218</b>                                                   | <b>2154219</b>                                                                   | <b>2154220</b>                                                   |
| Empirical formula                                           | C <sub>45</sub> H <sub>70</sub> KN <sub>5</sub> Si <sub>11</sub> | C <sub>63</sub> H <sub>106</sub> KN <sub>7</sub> O <sub>6</sub> Si <sub>11</sub> | C <sub>50</sub> H <sub>79</sub> IN <sub>5</sub> Si <sub>11</sub> |
| Formula weight /g·mol <sup>-1</sup>                         | 1029.15                                                          | 1405.63                                                                          | 1186.07                                                          |
| Crystal color, shape                                        | yellow plate                                                     | orange block                                                                     | pale yellow plate                                                |
| Crystal size /mm <sup>3</sup>                               | 0.204 × 0.358 × 0.404                                            | 0.321 × 0.367 × 0.457                                                            | 0.189 × 0.302 × 0.414                                            |
| Crystal system                                              | monoclinic                                                       | triclinic                                                                        | triclinic                                                        |
| Space group                                                 | <i>P</i> 2 <sub>1</sub> / <i>n</i>                               | <i>P</i> -1                                                                      | <i>P</i> -1                                                      |
| <i>a</i> /Å                                                 | 15.5664(5)                                                       | 13.6587(4)                                                                       | 12.5574(5)                                                       |
| <i>b</i> /Å                                                 | 18.7250(6)                                                       | 15.9267(5)                                                                       | 13.3175(5)                                                       |
| <i>c</i> /Å                                                 | 19.2084(6)                                                       | 21.2413(6)                                                                       | 20.6076(8)                                                       |
| $\alpha$ /°                                                 | 90                                                               | 78.5250(10)                                                                      | 91.468(2)                                                        |
| $\beta$ /°                                                  | 100.860(2)                                                       | 73.5770(10)                                                                      | 106.579(2)                                                       |
| $\gamma$ /°                                                 | 90                                                               | 72.8440(10)                                                                      | 110.641(2)                                                       |
| <i>V</i> /Å <sup>3</sup>                                    | 5498.6(3)                                                        | 4201.3(2)                                                                        | 3060.2(2)                                                        |
| <i>Z</i>                                                    | 4                                                                | 2                                                                                | 2                                                                |
| <i>T</i> /K                                                 | 100(2)                                                           | 100(2)                                                                           | 100(2)                                                           |
| Completeness to $\theta$ 25.24° /%                          | 99.9                                                             | 98.3                                                                             | 99.6                                                             |
| $\rho_{\text{calc}}$ /g·cm <sup>-3</sup>                    | 1.243                                                            | 1.111                                                                            | 1.287                                                            |
| $\mu$ (Mo) or $\mu$ (Cu)/mm <sup>-1</sup>                   | 0.372                                                            | 0.266                                                                            | 0.775                                                            |
| $2\theta$ range /°                                          | 3.06-54.65                                                       | 4.18-54.23                                                                       | 2.08-54.81                                                       |
| Reflections measured                                        | 61109                                                            | 53115                                                                            | 42882                                                            |
| Independent reflections                                     | 12327                                                            | 18288                                                                            | 13688                                                            |
| <i>R</i> (int)                                              | 0.0508                                                           | 0.0299                                                                           | 0.0354                                                           |
| Ind. reflections ( <i>I</i> > 2 $\sigma$ ( <i>I</i> ))      | 9063                                                             | 16658                                                                            | 12545                                                            |
| Parameters                                                  | 599                                                              | 808                                                                              | 621                                                              |
| Restraints                                                  | 0                                                                | 0                                                                                | 0                                                                |
| <i>R</i> <sub>1</sub> ( <i>I</i> > 2 $\sigma$ ( <i>I</i> )) | 0.0567                                                           | 0.0423                                                                           | 0.0353                                                           |
| <i>wR</i> <sub>2</sub> (all data)                           | 0.1621                                                           | 0.1187                                                                           | 0.0969                                                           |
| <i>Goof</i> (all data)                                      | 1.060                                                            | 1.091                                                                            | 1.045                                                            |
| Max. peak/hole /e <sup>-</sup> ·Å <sup>-3</sup>             | 0.753 /-0.302                                                    | 1.085 /-0.435                                                                    | 1.690 /-0.567                                                    |
| Absorption correction type                                  | Multi-scan                                                       | Multi-scan                                                                       | Multi-scan                                                       |
| Min. /Max. transmission                                     | 0.4639 /0.7455                                                   | 0.5630 /0.7455                                                                   | 0.6102 /0.7455                                                   |



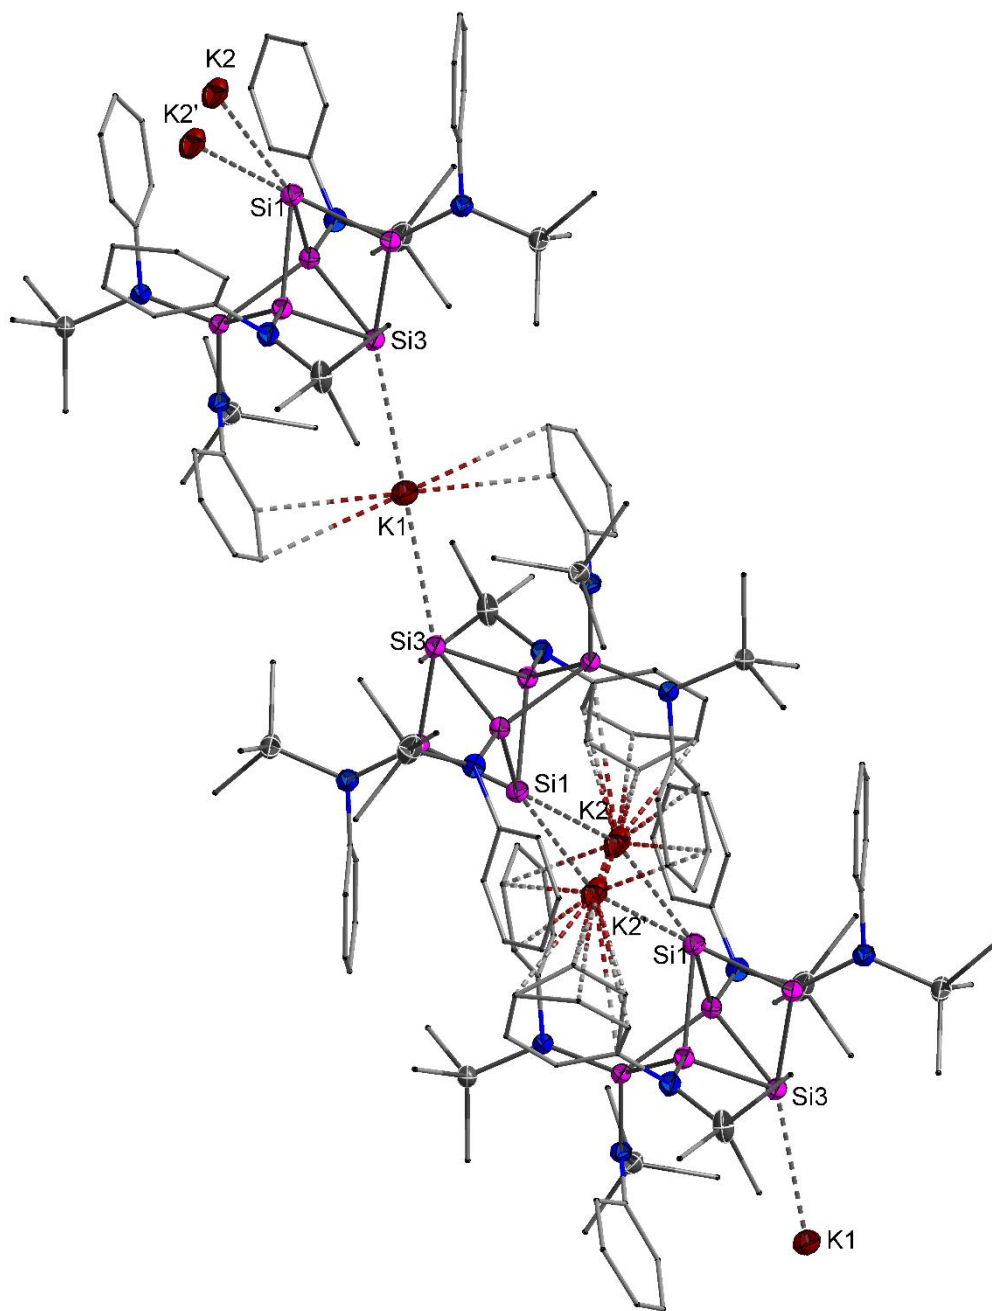

**Figure S70.** Molecular structure of **2**.

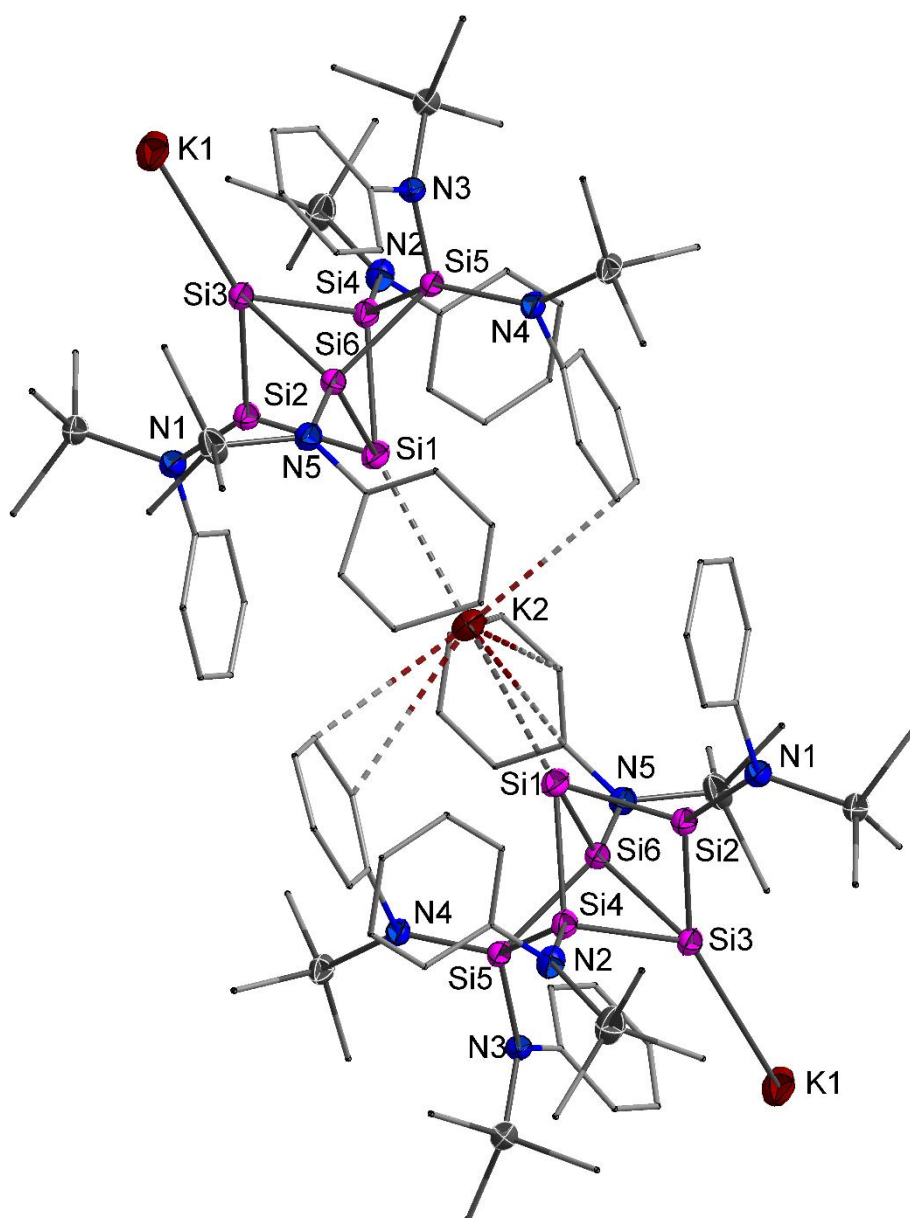

**Figure S71.** Molecular structure of **2**.

Selected distances /Å:

Si1–Si2 2.2782(11), Si1–Si6 2.4168(11), Si1–Si4 2.4169(11), Si2–Si3 2.2897(10),  
 Si2–Si4 2.6631(11), Si2–Si6 2.6969(11), Si3–Si6 2.4048(11), Si3–Si4 2.4365(11),  
 Si4–Si5 2.3898(11), Si4–Si6 2.6443(12), Si5–Si6 2.3514(11), Si2–N1 1.741(2),  
 Si4–N2 1.756(3), Si5–N3 1.781(2), Si5–N4 1.755(2), Si6–N5 1.760(3), Si7–N1 1.764(2),  
 Si8–N2 1.748(3), Si9–N3 1.761(2), Si10–N4 1.754(2), Si11–N5 1.739(3), Si7–C7 1.862(3),  
 Si7–C8 1.858(4), Si7–C9 1.850(3), Si8–C16 1.851(3), Si8–C17 1.854(4), Si8–C18 1.855(4),

Si9–C25 1.861(3), Si9–C26 1.866(3), Si9–C27 1.851(3), Si10–C34 1.831(3),  
Si10–C35 1.857(4), Si10–C36 1.867(4), Si11–C43 1.862(4), Si11–C44 1.863(4),  
Si11–C45 1.857(4), K1····Si3 3.3172(7), K1····C20 3.159(3), K1····C21 3.378(3),  
K2····Si1 3.4206(16), K2····Si1 3.2833(15), K2····C30 3.316(4), K2····C37 3.407(3),  
K2····C40 3.108(5), K2····C41 3.214(9), K2····C42 3.299(9).

Selected angles /°:

Si2–Si1–Si6 70.05(3), Si2–Si1–Si4 69.04(3), Si6–Si1–Si4 66.33(3), Si1–Si2–Si3 104.08(4),  
Si1–Si2–Si4 57.94(3), Si3–Si2–Si4 58.36(3), Si1–Si2–Si6 57.39(3), Si3–Si2–Si6 56.96(3),  
Si4–Si2–Si6 59.12(3), Si2–Si3–Si6 70.08(3), Si2–Si3–Si4 68.51(3), Si6–Si3–Si4 66.21(3),  
Si5–Si4–Si1 92.71(4), Si5–Si4–Si3 87.42(4), Si1–Si4–Si3 95.82(4), Si5–Si4–Si6 55.41(3),  
Si1–Si4–Si6 56.83(3), Si3–Si4–Si6 56.32(3), Si5–Si4–Si2 116.38(4), Si1–Si4–Si2 53.02(3),  
Si3–Si4–Si2 53.13(3), Si6–Si4–Si2 61.08(3), Si6–Si5–Si4 67.79(3), Si5–Si6–Si3 89.04(4),  
Si5–Si6–Si1 93.68(4), Si3–Si6–Si1 96.66(4), Si5–Si6–Si4 56.79(3), Si3–Si6–Si4 57.47(3),  
Si1–Si6–Si4 56.84(3), Si5–Si6–Si2 116.49(4), Si3–Si6–Si2 52.96(3), Si1–Si6–Si2 52.56(3),  
Si4–Si6–Si2 59.80(3), N1–Si2–Si1 127.00(8), N1–Si2–Si3 128.66(8), N1–Si2–Si4 144.78(9),  
N1–Si2–Si6 156.08(9), N2–Si4–Si5 131.39(9), N2–Si4–Si1 119.07(9), N2–Si4–Si3 121.20(9),  
N2–Si4–Si6 173.18(9), N2–Si4–Si2 112.16(9), N4–Si5–N3 107.64(11), N4–Si5–Si6 121.66(8),  
N3–Si5–Si6 116.58(8), N4–Si5–Si4 121.49(8), N3–Si5–Si4 117.55(8), N5–Si6–Si5 128.63(9),  
N5–Si6–Si3 123.05(9), N5–Si6–Si1 117.57(8), N5–Si6–Si4 173.67(8), N5–Si6–Si2 114.88(8),  
N1–Si7–C9 109.26(13), N1–Si7–C8 109.72(14), C9–Si7–C8 107.54(18),  
N1–Si7–C7 109.83(13), C9–Si7–C7 108.98(16), C8–Si7–C7 111.45(18),  
N2–Si8–C16 114.69(15), N2–Si8–C17 107.86(16), C16–Si8–C17 106.42(18),  
N2–Si8–C18 111.23(17), C16–Si8–C18 106.6(2), C17–Si8–C18 109.9(3),  
N3–Si9–C27 107.18(12), N3–Si9–C25 112.24(14), C27–Si9–C25 107.21(15),  
N3–Si9–C26 112.31(14), C27–Si9–C26 110.51(15), C25–Si9–C26 107.29(15),  
N4–Si10–C34 114.45(13), N4–Si10–C35 111.59(15), C34–Si10–C35 106.89(17),  
N4–Si10–C36 108.11(14), C34–Si10–C36 109.58(18), C35–Si10–C36 105.9(2),  
N5–Si11–C45 110.13(14), N5–Si11–C43 108.00(16), C45–Si11–C43 109.5(2),  
N5–Si11–C44 111.92(17), C45–Si11–C44 107.79(18), C43–Si11–C44 109.46(18),  
C1–N1–Si2 116.98(18), C1–N1–Si7 115.95(18), Si2–N1–Si7 126.86(13),  
C10–N2–Si8 110.34(19), C10–N2–Si4 117.7(2), Si8–N2–Si4 130.54(14),  
C19–N3–Si9 120.57(17), C19–N3–Si5 117.85(18), Si9–N3–Si5 120.32(13),  
C28–N4–Si10 109.83(16), C28–N4–Si5 114.30(17), Si10–N4–Si5 135.86(13),

C37-N5-Si11 117.5(2), C37-N5-Si6 115.1(2), Si11-N5-Si6 125.28(14).

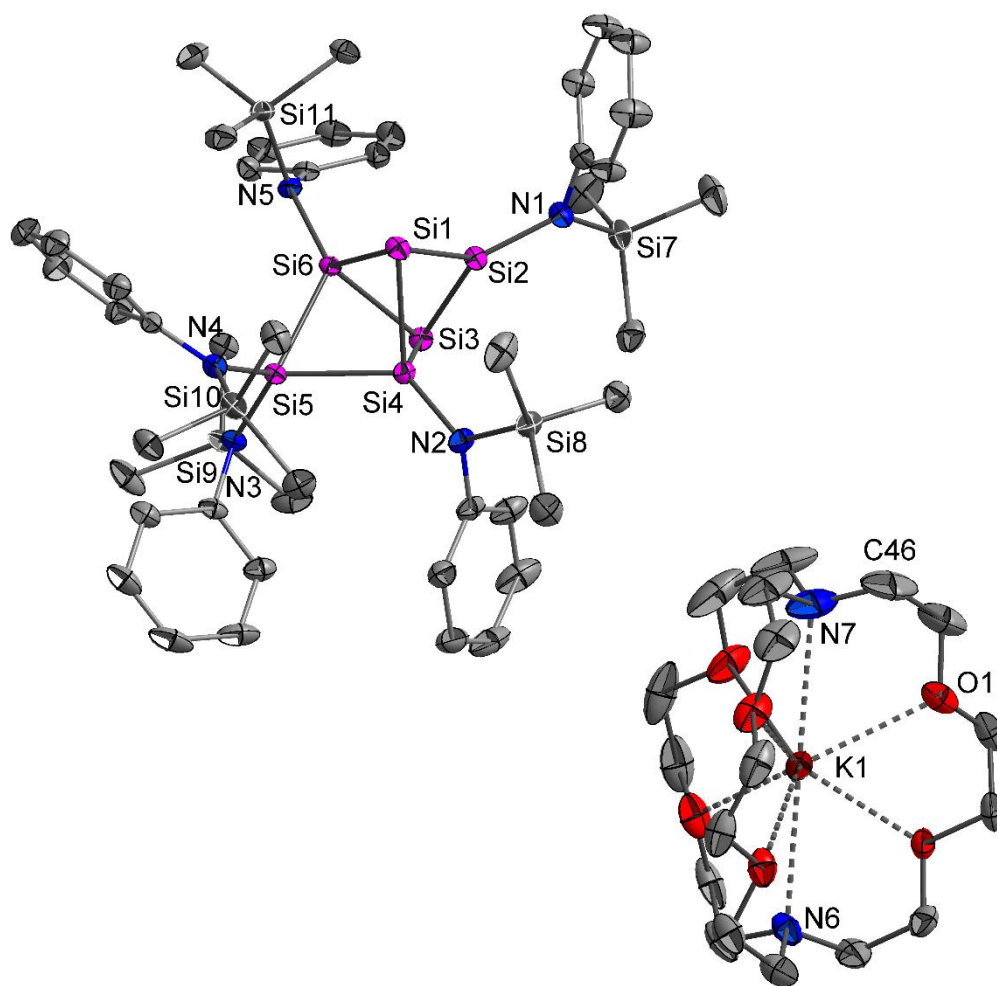

**Figure S72.** Molecular structure of **3**.

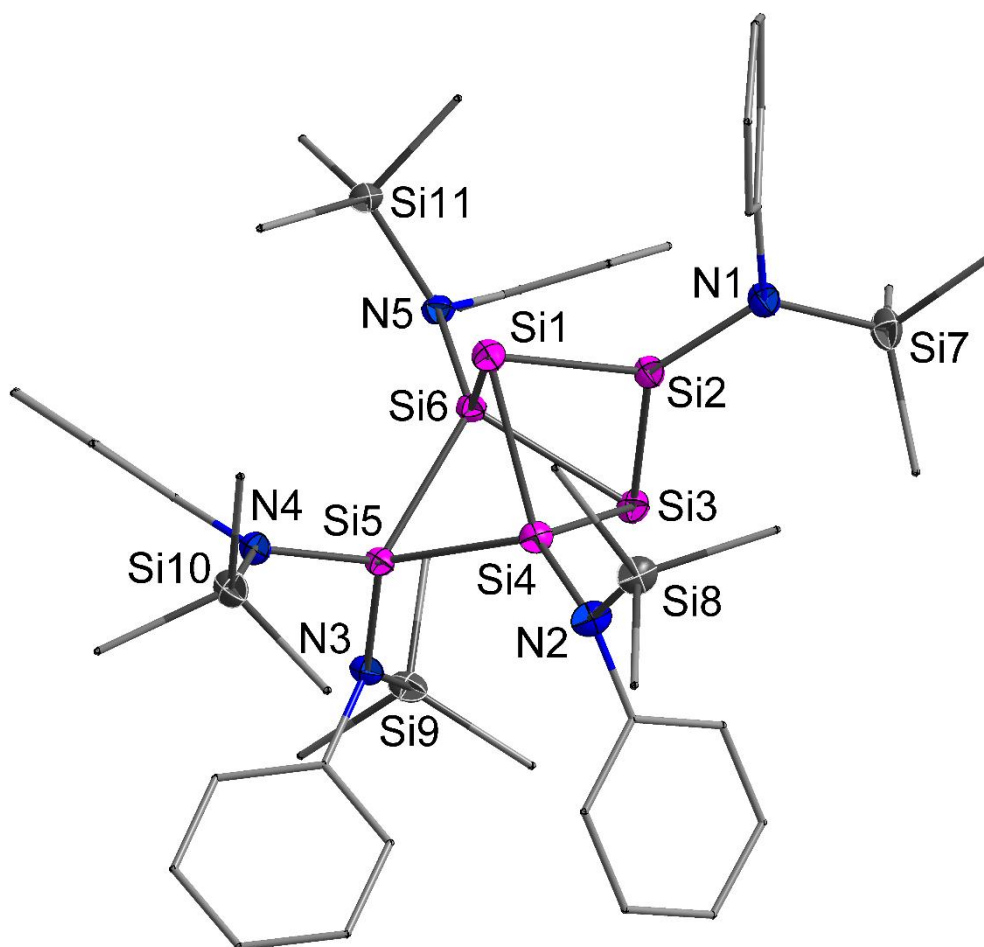

**Figure S73.** Molecular structure of **3**.

Selected distances /Å:

Si1–Si2 2.2936(6), Si1–Si4 2.4303(6), Si1–Si6 2.4359(6), Si2–Si3 2.2936(6),  
 Si2–Si4 2.6092(6), Si2–Si6 2.6574(6), Si3–Si6 2.4189(6), Si3–Si4 2.4530(6),  
 Si4–Si5 2.3625(6), Si4–Si6 2.6331(6), Si5–Si6 2.3638(6), Si2–N1 1.7541(14),  
 Si4–N2 1.7719(14), Si5–N3 1.7690(13), Si5–N4 1.7892(13), Si6–N5 1.7698(13),  
 Si7–N1 1.7590(14), Si7–C7 1.860(2), Si7–C9 1.863(2), Si7–C8 1.865(2),  
 Si8–N2 1.7452(14), Si8–C18 1.862(2), Si8–C17 1.863(2), Si8–C16 1.865(2),  
 Si9–N3 1.7404(13), Si9–C26 1.8566(17), Si9–C27 1.866(2), Si9–C25 1.874(2),  
 Si10–N4 1.7629(14), Si10–C35 1.8601(19), Si10–C36 1.8734(18), Si10–C34 1.8752(19),  
 Si11–N5 1.7584(14), Si11–C43 1.8546(18), Si11–C45 1.8700(18), Si11–C44 1.873(2),  
 K1···O4 2.7891(15), K1···O5 2.8013(17), K1···O6 2.8111(15), K1···O2 2.8267(13),

K1····O1 2.8382(16), K1····O3 2.8757(16), K1····N7 2.999(2), K1····N6 3.0354(17).

Selected angles /°:

Si2-Si1-Si4 66.983(19), Si2-Si1-Si6 68.294(18), Si4-Si1-Si6 65.516(18),  
Si1-Si2-Si3 106.36(2), Si1-Si2-Si4 59.014(17), Si3-Si2-Si4 59.631(17),  
Si1-Si2-Si6 58.394(17), Si3-Si2-Si6 57.936(17), Si4-Si2-Si6 59.987(16),  
Si2-Si3-Si6 68.593(19), Si2-Si3-Si4 66.594(18), Si6-Si3-Si4 65.427(18),  
Si5-Si4-Si1 90.71(2), Si5-Si4-Si3 89.90(2), Si1-Si4-Si3 97.52(2),  
Si5-Si4-Si2 117.08(2), Si1-Si4-Si2 54.003(16), Si3-Si4-Si2 53.775(16),  
Si5-Si4-Si6 56.167(16), Si1-Si4-Si6 57.344(17), Si3-Si4-Si6 56.661(16),  
Si2-Si4-Si6 60.914(16), Si4-Si5-Si6 67.713(18), Si5-Si6-Si3 90.71(2),  
Si5-Si6-Si1 90.54(2), Si3-Si6-Si1 98.29(2), Si5-Si6-Si4 56.120(16),  
Si3-Si6-Si4 57.912(17), Si1-Si6-Si4 57.140(17), Si5-Si6-Si2 115.22(2),  
Si3-Si6-Si2 53.471(16), Si1-Si6-Si2 53.312(16), Si4-Si6-Si2 59.099(16).  
N1-Si2-Si1 127.81(5), N1-Si2-Si3 125.82(5), N1-Si2-Si4 147.37(5),  
N1-Si2-Si6 152.62(5), N2-Si4-Si5 128.95(5), N2-Si4-Si1 121.53(5),  
N2-Si4-Si3 119.68(5), N2-Si4-Si2 113.94(5), N2-Si4-Si6 174.66(5),  
N3-Si5-N4 105.38(6), N3-Si5-Si4 120.37(5), N4-Si5-Si4 119.97(5),  
N3-Si5-Si6 121.74(5), N4-Si5-Si6 118.81(5), N5-Si6-Si5 130.36(5),  
N5-Si6-Si3 120.87(5), N5-Si6-Si1 117.95(5), N5-Si6-Si4 173.16(5),  
N5-Si6-Si2 114.38(5).

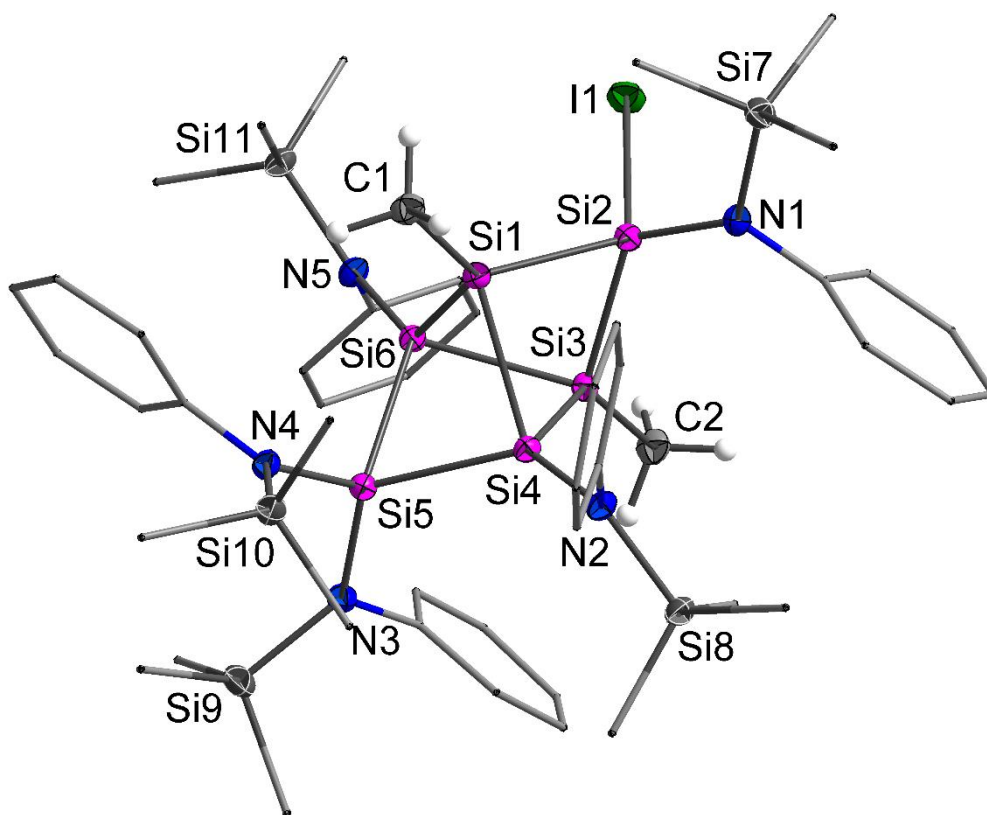

**Figure S74.** Molecular structure of **4**.

Selected distances /Å:

I1–Si2 2.5352(6), Si1–C1 1.866(2), Si3–C2 1.859(2),  
 Si1–Si2 2.3137(8), Si1–Si6 2.3335(8), Si1–Si4 2.3982(7), Si2–Si3 2.3096(8),  
 Si3–Si4 2.3380(8), Si3–Si6 2.3720(8), Si4–Si5 2.3778(7), Si5–Si6 2.3653(7),  
 Si2–N1 1.7323(18), Si4–N2 1.7525(18), Si5–N3 1.7394(18), Si5–N4 1.7537(18),  
 Si6–N5 1.7361(17), Si7–N1 1.7592(18), Si7–C9 1.858(2), Si7–C10 1.859(2),  
 Si7–C11 1.852(2), Si8–N2 1.7593(18), Si8–C18 1.859(2), Si8–C19 1.855(2),  
 Si8–C20 1.862(2), Si9–N3 1.7600(18), Si9–C27 1.846(3), Si9–C28 1.860(3),  
 Si9–C29 1.873(3), Si10–N4 1.7629(18), Si10–C36 1.863(2), Si10–C37 1.857(2),  
 Si10–C38 1.861(2), Si11–N5 1.7472(18), Si11–C45 1.858(2), Si11–C46 1.850(2),  
 Si11–C47 1.851(2).

Selected angles /°:

C1-Si1-Si2 130.77(7), C1-Si1-Si6 128.22(8), C1-Si1-Si4 126.81(7), C2-Si3-Si2 125.99(8),  
C2-Si3-Si4 132.62(8), C2-Si3-Si6 127.53(8), Si3-Si2-II 108.54(3), Si1-Si2-II 117.13(3),  
Si2-Si1-Si6 90.47(3), Si2-Si1-Si4 87.81(3), Si6-Si1-Si4 75.19(2), Si3-Si2-Si1 78.55(3),  
Si2-Si3-Si4 89.36(3), Si2-Si3-Si6 89.61(3), Si4-Si3-Si6 75.60(2), Si3-Si4-Si5 93.92(3),  
Si3-Si4-Si1 76.33(2), Si5-Si4-Si1 87.28(3), Si6-Si5-Si4 74.99(2), Si1-Si6-Si5 89.09(3),  
Si1-Si6-Si3 76.92(3), Si5-Si6-Si3 93.37(3), N1-Si2-II 106.02(6), N1-Si2-Si3 124.28(7),  
N1-Si2-Si1 120.68(7), N2-Si4-Si3 125.89(6), N2-Si4-Si5 132.23(6), N2-Si4-Si1 123.75(6),  
N3-Si5-N4 111.13(9), N3-Si5-Si6 120.18(7), N4-Si5-Si6 112.46(6), N3-Si5-Si4 120.00(6),  
N4-Si5-Si4 113.80(6), N5-Si6-Si1 127.80(6), N5-Si6-Si5 130.68(7), N5-Si6-Si3 123.11(7).



**Table S2.** Crystal data and structure refinement for **5**(·C<sub>6</sub>H<sub>6</sub>), **6**.

| <b>Compound</b>                                             | <b>5(·C<sub>6</sub>H<sub>6</sub>)</b>                                           | <b>6</b>                                                                        |
|-------------------------------------------------------------|---------------------------------------------------------------------------------|---------------------------------------------------------------------------------|
| <b>CCDC number</b>                                          | <b>2154221</b>                                                                  | <b>2154222</b>                                                                  |
| Empirical formula                                           | C <sub>51</sub> H <sub>76</sub> Cl <sub>5</sub> N <sub>5</sub> Si <sub>12</sub> | C <sub>45</sub> H <sub>70</sub> Br <sub>5</sub> N <sub>5</sub> Si <sub>12</sub> |
| Formula weight /g·mol <sup>-1</sup>                         | 1273.49                                                                         | 1417.69                                                                         |
| Crystal color, shape                                        | colourless, block                                                               | yellow, rod                                                                     |
| Crystal size /mm <sup>3</sup>                               | 0.639×0.403×0.298                                                               | 0.627×0.353×0.270                                                               |
| Crystal system                                              | triclinic                                                                       | monoclinic                                                                      |
| Space group                                                 | <i>P</i> -1                                                                     | <i>P</i> 2 <sub>1</sub> / <i>n</i>                                              |
| <i>a</i> /Å                                                 | 13.0493(5)                                                                      | 20.6155(6)                                                                      |
| <i>b</i> /Å                                                 | 13.4471(6)                                                                      | 13.5318(4)                                                                      |
| <i>c</i> /Å                                                 | 20.7283(9)                                                                      | 23.7454(7)                                                                      |
| $\alpha$ /°                                                 | 71.982(2)                                                                       | 90                                                                              |
| $\beta$ /°                                                  | 84.352(2)                                                                       | 111.4260(10)                                                                    |
| $\gamma$ /°                                                 | 72.0140(10)                                                                     | 90                                                                              |
| <i>V</i> /Å <sup>3</sup>                                    | 3289.9(2)                                                                       | 6166.3(3)                                                                       |
| <i>Z</i>                                                    | 2                                                                               | 4                                                                               |
| <i>T</i> /K                                                 | 100(2)                                                                          | 101(2)                                                                          |
| Completeness to $\theta$ 25.24° /%                          | 98.3                                                                            | 99.9                                                                            |
| $\rho_{\text{calc}}$ /g·cm <sup>-3</sup>                    | 1.286                                                                           | 1.527                                                                           |
| $\mu$ (Mo) or $\mu$ (Cu)/mm <sup>-1</sup>                   | 0.477                                                                           | 3.527                                                                           |
| 2 $\theta$ range /°                                         | 3.93-54.27                                                                      | 3.76-54.27                                                                      |
| Reflections measured                                        | 43541                                                                           | 83454                                                                           |
| Independent reflections                                     | 14291                                                                           | 13624                                                                           |
| <i>R</i> (int)                                              | 0.0236                                                                          | 0.0262                                                                          |
| Ind. reflections ( <i>I</i> > 2 $\sigma$ ( <i>I</i> ))      | 13411                                                                           | 12669                                                                           |
| Parameters                                                  | 673                                                                             | 619                                                                             |
| Restraints                                                  | 0                                                                               | 0                                                                               |
| <i>R</i> <sub>1</sub> ( <i>I</i> > 2 $\sigma$ ( <i>I</i> )) | 0.0269                                                                          | 0.0232                                                                          |
| <i>wR</i> <sub>2</sub> (all data)                           | 0.0765                                                                          | 0.0558                                                                          |
| <i>Goof</i> (all data)                                      | 1.077                                                                           | 1.096                                                                           |
| Max. peak/hole /e <sup>-</sup> ·Å <sup>-3</sup>             | 0.487 /-0.406                                                                   | 0.645 /-0.331                                                                   |
| Absorption correction type                                  | multi-scan                                                                      | multi-scan                                                                      |
| Min. /Max. transmission                                     | 0.6723 / 0.7455                                                                 | 0.4598 / 0.7455                                                                 |

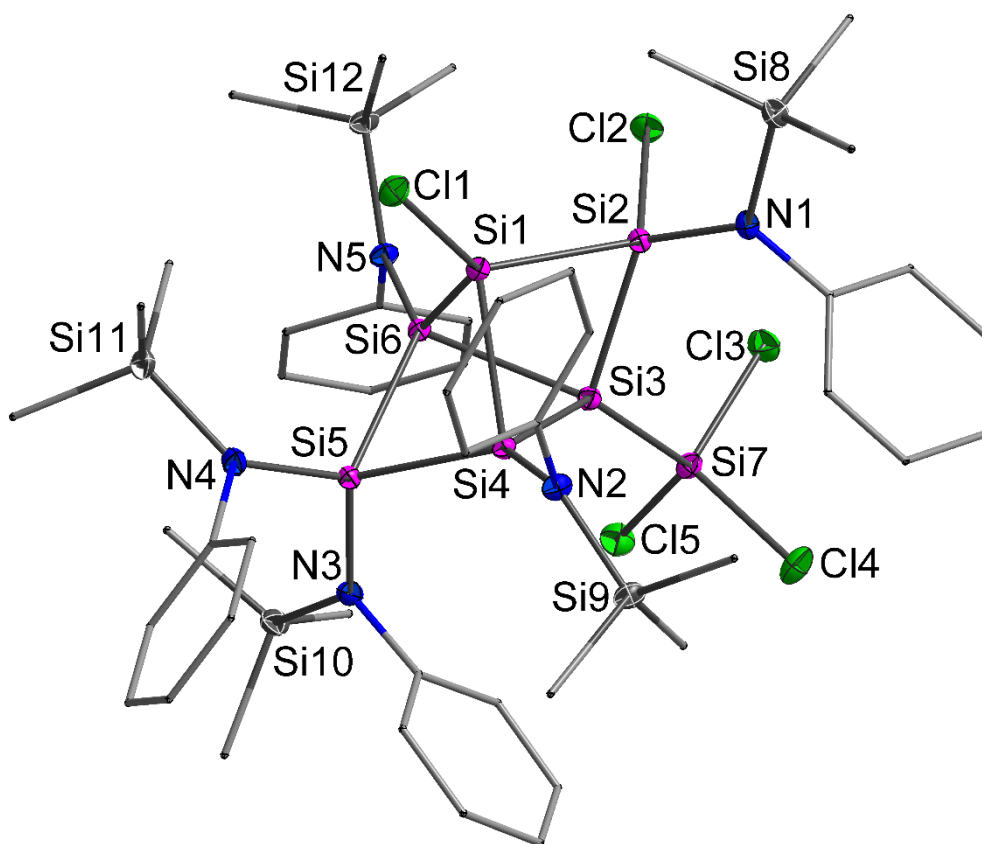

**Figure S75.** Molecular structure of **5**.

Selected distances /Å:

Si1–Si2 2.3215(5), Si1–Si6 2.3275(5), Si1–Si4 2.3771(5), Si1–Si3 2.8330(5),  
 Si2–Si3 2.3402(5), Si3–Si7 2.3106(5), Si3–Si4 2.3471(5), Si3–Si6 2.4261(5),  
 Si4–Si5 2.3969(5), Si5–Si6 2.3951(5), Cl1–Si1 2.0669(5), Cl2–Si2 2.0967(5),  
 Cl3–Si7 2.0422(5), Cl4–Si7 2.0389(5), Cl5–Si7 2.0351(5), Si2–N1 1.7203(11),  
 Si4–N2 1.7419(11), Si5–N3 1.7393(11), Si5–N4 1.7424(11), Si6–N5 1.7285(11),  
 Si8–N1 1.7613(12), Si8–C7 1.8618(16), Si8–C8 1.8587(17), Si8–C9 1.8705(17),  
 Si9–N2 1.7590(11), Si9–C16 1.8505(14), Si9–C17 1.8707(15), Si9–C18 1.8726(15),  
 Si10–N3 1.7667(11), Si10–C25 1.8665(15), Si10–C26 1.8677(15), Si10–C27 1.8629(15),  
 Si11–N4 1.7607(12), Si11–C34 1.8663(17), Si11–C35 1.8636(15), Si11–C36 1.8552(15),  
 Si12–N5 1.7724(11), Si12–C43 1.8679(14), Si12–C44 1.8654(14), Si12–C45 1.8598(14).

Selected angles /°:

Si2-Si1-Si6 91.770(17), Si2-Si1-Si4 93.617(17), Si6-Si1-Si4 77.888(15),  
Si2-Si1-Si3 52.876(13), Si6-Si1-Si3 55.037(13), Si4-Si1-Si3 52.669(13),  
Si1-Si2-Si3 74.850(16), Si7-Si3-Si2 116.670(18), Si7-Si3-Si4 140.76(2),  
Si2-Si3-Si4 93.917(17), Si7-Si3-Si6 124.813(19), Si2-Si3-Si6 88.878(16),  
Si4-Si3-Si6 76.550(15), Si7-Si3-Si1 165.552(18), Si2-Si3-Si1 52.274(13),  
Si4-Si3-Si1 53.639(13), Si6-Si3-Si1 51.833(12), Si3-Si4-Si1 73.692(15),  
Si3-Si4-Si5 91.786(16), Si1-Si4-Si5 89.797(16), Si6-Si5-Si4 76.218(15),  
Si1-Si6-Si5 91.035(16), Si5-Si6-Si3 89.912(16), Si1-Si6-Si3 73.130(15),  
Cl1-Si1-Si2 131.56(2), Cl1-Si1-Si6 126.49(2), Cl1-Si1-Si4 120.104(19),  
Cl1-Si1-Si3 172.77(2), Cl5-Si7-Cl4 105.06(2), Cl5-Si7-Cl3 106.41(2),  
Cl4-Si7-Cl3 107.46(2), Cl5-Si7-Si3 117.64(2), Cl4-Si7-Si3 113.47(2),  
Cl3-Si7-Si3 106.233(19), Cl2-Si2-Si1 114.724(19), Cl2-Si2-Si3 112.028(19),  
N1-Si2-Cl2 105.59(4), N1-Si2-Si1 124.47(4), N1-Si2-Si3 123.00(4),  
N2-Si4-Si3 127.76(4), N2-Si4-Si1 115.72(4), N2-Si4-Si5 136.55(4),  
N3-Si5-N4 110.04(5), N3-Si5-Si6 119.26(4), N4-Si5-Si6 116.71(4),  
N3-Si5-Si4 112.79(4), N4-Si5-Si4 118.42(4), N5-Si6-Si1 125.14(4),  
N5-Si6-Si5 134.57(4), N5-Si6-Si3 123.80(4).

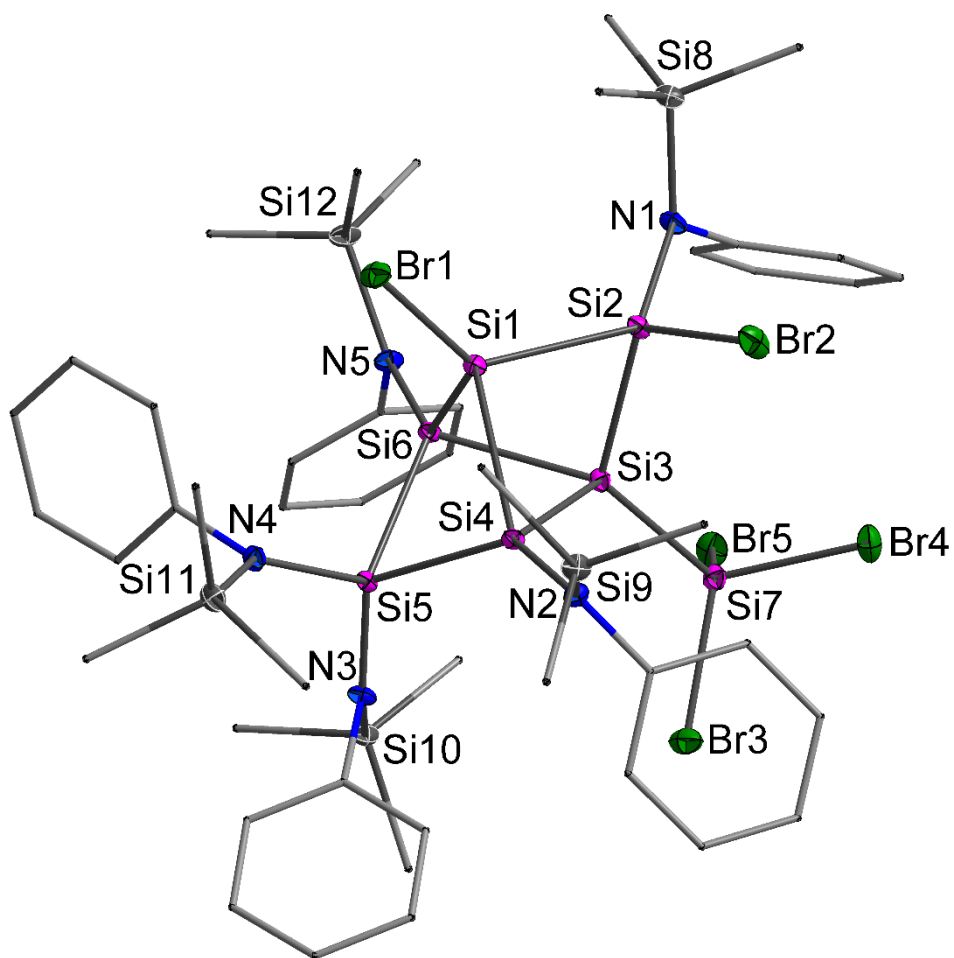

**Figure S76.** Molecular structure of **6**.

Selected distances /Å:

Si1–Si2 2.3327(7), Si1–Si4 2.3635(6), Si1–Si6 2.3833(6), Si1–Si3 2.8335(7),  
 Si2–Si3 2.3364(7), Si3–Si7 2.3125(7), Si3–Si6 2.3766(7), Si3–Si4 2.3907(6),  
 Si4–Si5 2.3958(6), Si5–Si6 2.3888(6), Br1–Si1 2.2466(5), Br2–Si2 2.2579(5),  
 Br3–Si7 2.2192(5), Br4–Si7 2.2043(5), Br5–Si7 2.2095(5), Si2–N1 1.7190(15),  
 Si4–N2 1.7345(15), Si5–N3 1.7393(15), Si5–N4 1.7441(15), Si6–N5 1.7326(15),  
 Si8–N1 1.7617(15), Si8–C7 1.865(2), Si8–C8 1.858(2), Si8–C9 1.860(2),  
 Si9–N2 1.7641(15), Si9–C16 1.859(2), Si9–C17 1.864(2), Si9–C18 1.857(2),  
 Si10–N3 1.7649(15), Si10–C25 1.8674(19), Si10–C26 1.8636(19), Si10–C27 1.8557(19),  
 Si11–N4 1.7599(15), Si11–C34 1.864(2), Si11–C35 1.861(2), Si11–C36 1.866(2),  
 Si12–N5 1.7638(15), Si12–C43 1.859(2), Si12–C44 1.845(2), Si12–C45 1.865(2).

Selected angles /°:

Si2-Si1-Si4 92.36(2), Si2-Si1-Si6 92.92(2), Si4-Si1-Si6 77.04(2), Si2-Si1-Si3 52.695(17),  
Si4-Si1-Si3 53.859(17), Si6-Si1-Si3 53.358(17), Si1-Si2-Si3 74.73(2), Si7-Si3-Si2 124.37(3),  
Si7-Si3-Si6 133.41(3), Si2-Si3-Si6 93.00(2), Si7-Si3-Si4 123.08(3), Si2-Si3-Si4 91.58(2),  
Si6-Si3-Si4 76.65(2), Si7-Si3-Si1 172.59(3), Si2-Si3-Si1 52.578(18), Si6-Si3-Si1 53.577(17),  
Si4-Si3-Si1 52.975(17), Si1-Si4-Si5 90.25(2), Si3-Si4-Si5 91.48(2), Si6-Si5-Si4 76.32(2),  
Si3-Si6-Si1 73.07(2), Si3-Si6-Si5 92.00(2), Si1-Si6-Si5 89.94(2), Si1-Si4-Si3 73.17(2),  
Br1-Si1-Si2 127.46(2), Br1-Si1-Si4 126.04(2), Br1-Si1-Si6 126.55(2), Br1-Si1-Si3 179.85(3),  
Br2-Si2-Si1 113.04(2), Br2-Si2-Si3 113.48(2), Br4-Si7-Br5 106.31(2),  
Br4-Si7-Br3 108.37(2), Br5-Si7-Br3 107.72(2), Br4-Si7-Si3 110.02(2),  
Br5-Si7-Si3 113.21(2), Br3-Si7-Si3 110.99(2), N1-Si2-Br2 106.43(5), N1-Si2-Si1 125.48(6),  
N1-Si2-Si3 121.18(6), N2-Si4-Si1 125.86(5), N2-Si4-Si3 122.08(6), N2-Si4-Si5 134.79(6),  
N3-Si5-N4 111.24(7), N3-Si5-Si6 120.89(5), N4-Si5-Si6 111.71(5), N3-Si5-Si4 119.81(5),  
N4-Si5-Si4 112.76(5), N5-Si6-Si3 124.97(6), N5-Si6-Si1 125.01(5), N5-Si6-Si5 133.23(6).

## 4. DFT-calculations

### 4.1 Methods

All structures were optimized without geometry constraints with density functional theory, using the resolution of the identity approximation<sup>[S9]</sup> and an atom-pairwise dispersion correction (D3).<sup>[S10]</sup> A flexible triple zeta basis set (def2-TZVP)<sup>[S11]</sup> was used in all calculations. Geometry optimizations were performed with the TPSS<sup>[S12]</sup> functional. For the calculation of zero point vibrational energies and free enthalpy contributions ( $G_{298}$ ) a rotor approximation was applied for vibrational modes with wave numbers below 100  $\text{cm}^{-1}$ .<sup>[S13]</sup> All geometry optimizations and vibrational frequency calculations were performed with the TURBOMOLE 7.3 program.<sup>[S14]</sup> Single point calculations were performed with the ORCA program (version 3.0.3).<sup>[S15]</sup> Intrinsic atomic orbitals were generated with the IBO program.<sup>[S16]</sup>

### 4.2 Electronic situation of the anion in **3**

The solid state structure of the anion in **3** was taken as a starting point for the vacuum geometry optimization with TPSS-D3/def2-TZVP. The minimum structure was similar to the molecular structure found in the crystal structure.

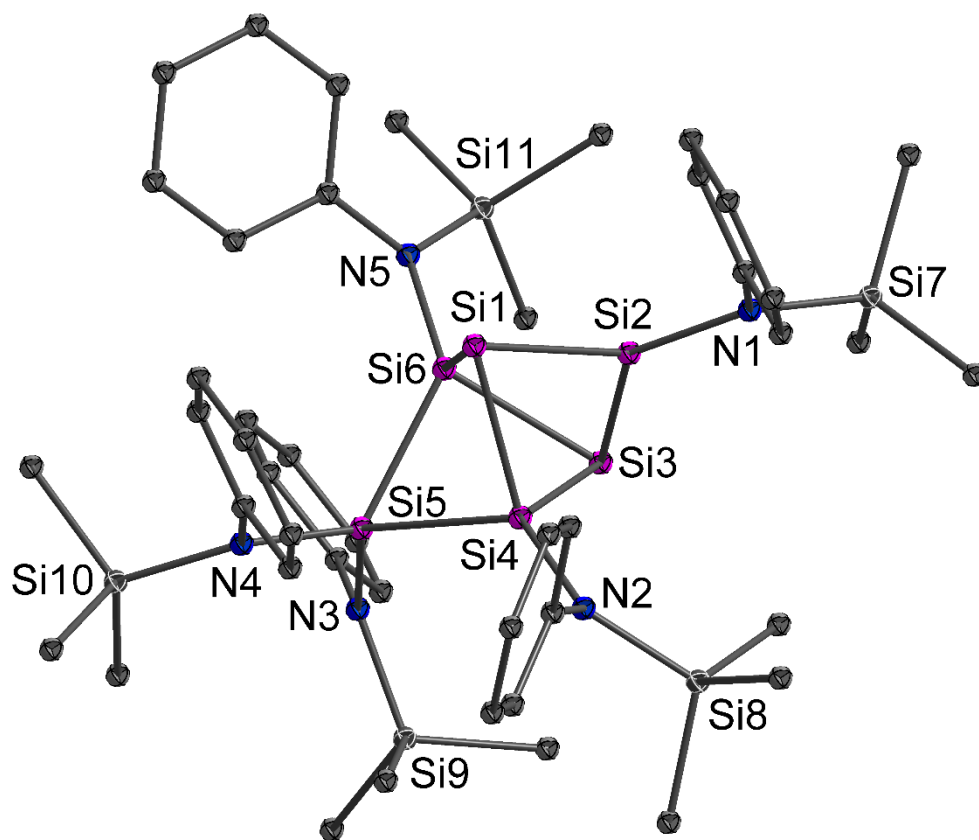

**Figure S77.** Gas phase (vacuum) structure of the anion in **3** optimized with DFT (TPSS-D3/def2-TZVP). Bond distances and angles are given in Table S3.

**Table S3.** Structural parameters of the anion in **3** after optimization with DFT (TPSS(D3-BJ)). Bond lengths are given in [Å], angles and dihedral angles in [°]. The numbering is taken from Figure S74.

| Parameter       | TPSS-D3/def2-TZVP | X-ray      |
|-----------------|-------------------|------------|
| Si1-Si2         | 2.2977            | 2.2936(6)  |
| Si2-Si3         | 2.3016            | 2.2936(6)  |
| Si3-Si4         | 2.4400            | 2.4530(6)  |
| Si4-Si5         | 2.3810            | 2.3625(6)  |
| Si5-Si6         | 2.3231            | 2.3638(6)  |
| Si6-Si3         | 2.4113            | 2.4189(6)  |
| Si6-Si1         | 2.4130            | 2.4359(6)  |
| Si1-Si4         | 2.4302            | 2.4303(6)  |
| Si4...Si6       | 2.6253            | 2.6331     |
| Si2...Si4       | 2.5458            | 2.6092     |
| Si2...Si6       | 2.6706            | 2.6574     |
| Si1...Si5       | 3.4459            | 3.4103     |
| Si3...Si5       | 3.2976            | 3.4028     |
| Si2-N1          | 1.7715            | 1.7541(14) |
| Si4-N2          | 1.7800            | 1.7719(14) |
| Si5-N3          | 1.7867            | 1.7690(13) |
| Si5-N4          | 1.7687            | 1.7892(13) |
| Si6-N5          | 1.7834            | 1.7698(13) |
| Si1-Si2-Si3     | 106.166           | 106.36(2)  |
| Si6-Si3-Si4     | 65.521            | 65.427(18) |
| Si3-Si4-Si5     | 86.306            | 89.90(2)   |
| Si4-Si5-Si6     | 67.834            | 67.713(18) |
| Si5-Si6-Si3     | 88.279            | 90.71(2)   |
| Si4-Si1-Si6     | 65.646            | 65.516(18) |
| Si3-Si4-Si6-Si5 | 111.415           | 116.009    |



### 4.3 Electronic Structure of the anion in 3

Figure S78. Kohn Sham molecular orbitals of the anion in 3.

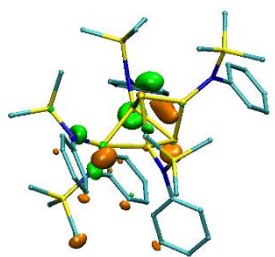

LUMO+18 (+0.847 eV, side view)

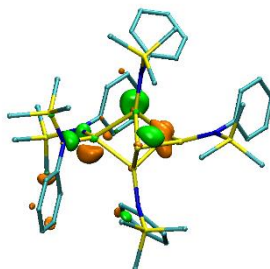

LUMO+18 (+0.847 eV, top view)

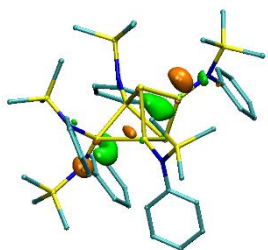

LUMO+14 (+0.457 eV, side view)

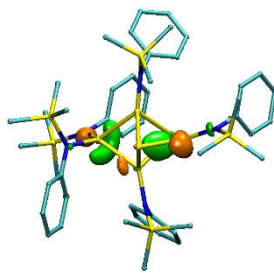

LUMO+14 (+0.457 eV, top view)

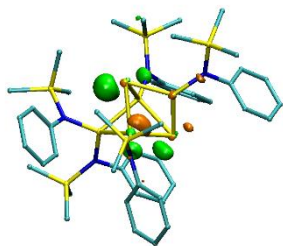

LUMO+13 (+0.390 eV, side view)

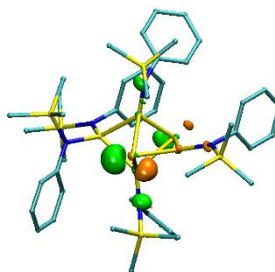

LUMO+13 (+0.390 eV, top view)

**Figure S78 (continued).** Kohn Sham molecular orbitals of the anion in **3**.

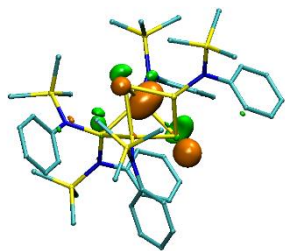

**LUMO+12** (+0.195 eV, side view)

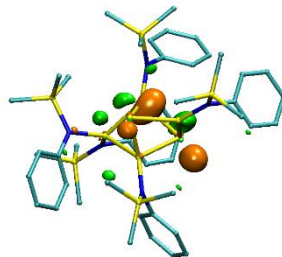

**LUMO+12** (+0.195 eV, top view)

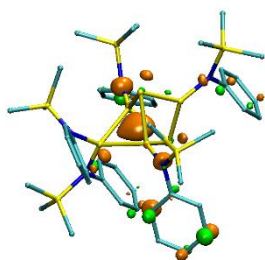

**LUMO+11** (-0.343 eV, side view)

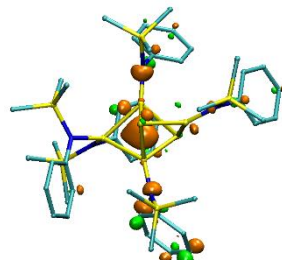

**LUMO+11** (-0.343 eV, top view)

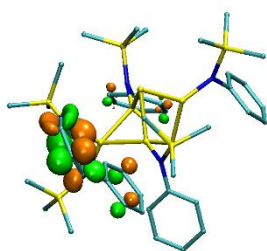

**LUMO+10** (-0.509 eV, side view)

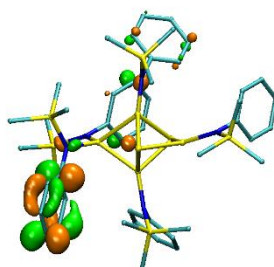

**LUMO+10** (-0.509 eV, top view)

**Figure S78 (continued).** Kohn Sham molecular orbitals of the anion in **3**.

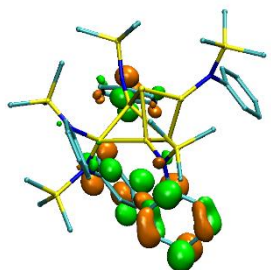

**LUMO+9** (-0.579 eV, side view)

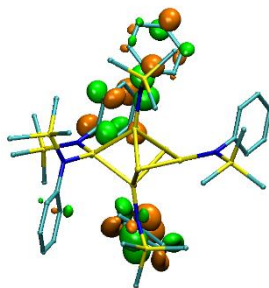

**LUMO+9** (-0.579 eV, top view)

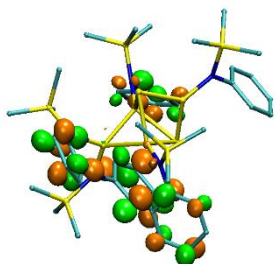

**LUMO+8** (-0.658 eV, side view)

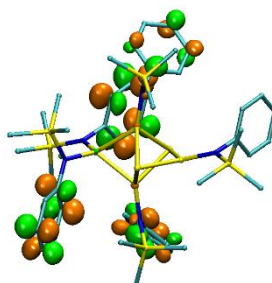

**LUMO+8** (-0.658 eV, top view)

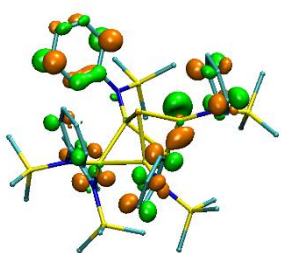

**LUMO+7** (-0.676 eV, side view)

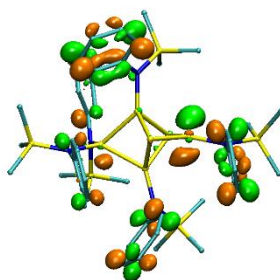

**LUMO+7** (-0.676 eV, top view)

**Figure S78 (continued).** Kohn Sham molecular orbitals of the anion in **3**.

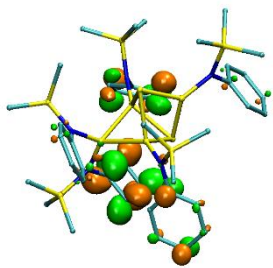

**LUMO+6** (-0.692 eV, side view)

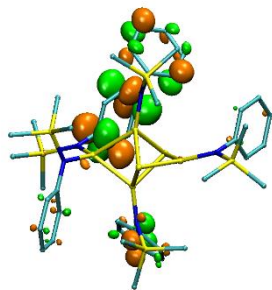

**LUMO+6** (-0.692 eV, top view)

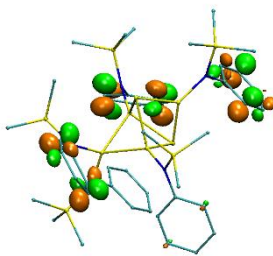

**LUMO+5** (-0.816 eV, side view)

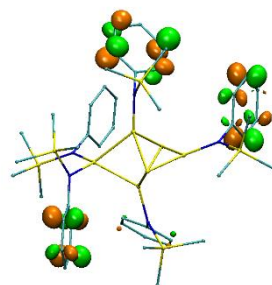

**LUMO+5** (-0.816 eV, top view)

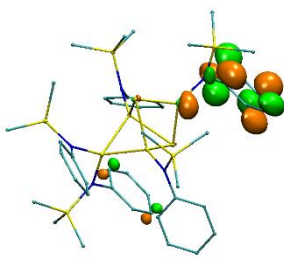

**LUMO+4** (-0.863 eV, side view)

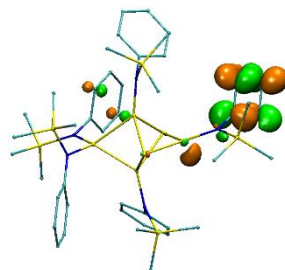

**LUMO+4** (-0.863 eV, top view)

**Figure S78 (continued).** Kohn Sham molecular orbitals of the anion in **3**.

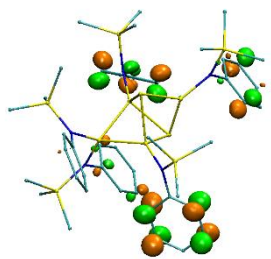

**LUMO+3** (-0.877 eV, side view)

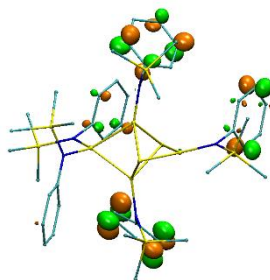

**LUMO+3** (-0.877 eV, top view)

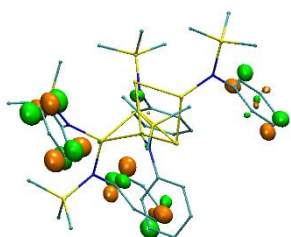

**LUMO+2** (-0.930 eV, side view)

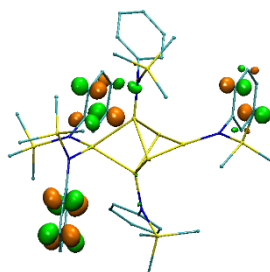

**LUMO+2** (-0.930 eV, top view)

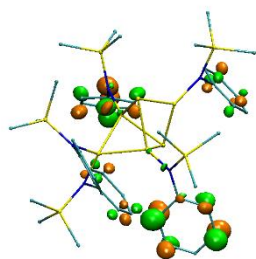

**LUMO+1** (-0.978 eV, side view)

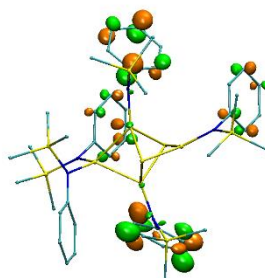

**LUMO+1** (-0.978 eV, top view)

**Figure S78 (continued).** Kohn Sham molecular orbitals of the anion in **3**.

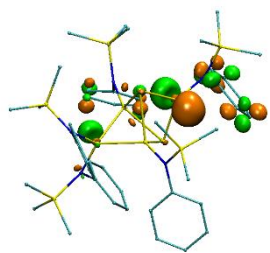

**LUMO** (-1.155 eV, side view)

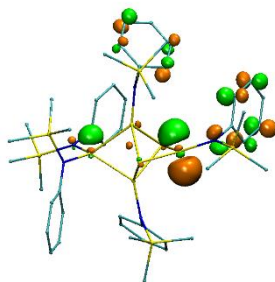

**LUMO** (-1.155 eV, top view)

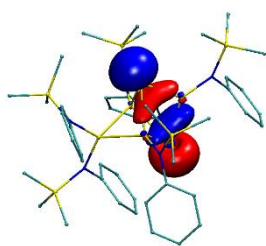

**HOMO** (-3.531 eV, side view)

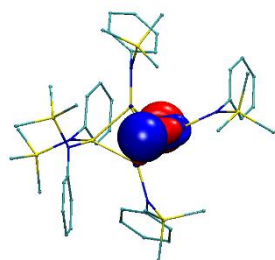

**HOMO** (-3.531 eV, top view)

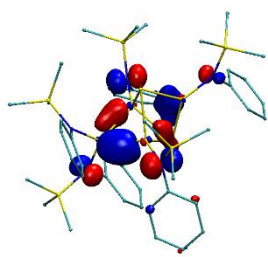

**HOMO-1** (-3.977 eV, side view)

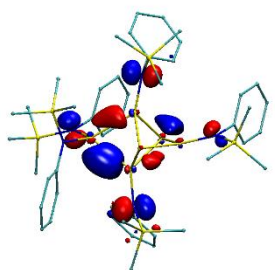

**HOMO-1** (-3.977 eV, top view)

**Figure S78 (continued).** Kohn Sham molecular orbitals of the anion in **3**.

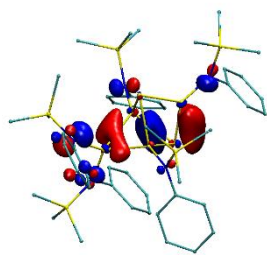

**HOMO-2** (-4.266 eV, side view)

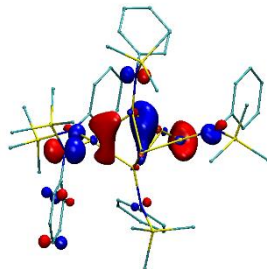

**HOMO-2** (-4.266 eV, top view)

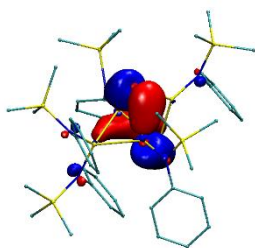

**HOMO-3** (-4.418 eV, side view)

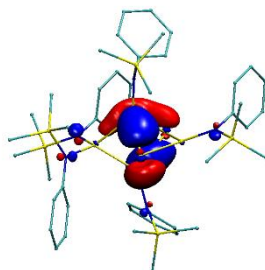

**HOMO-3** (-4.418 eV, top view)

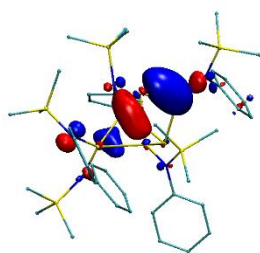

**HOMO-4** (-4.734 eV, side view)

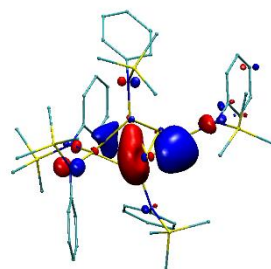

**HOMO-4** (-4.734 eV, top view)

**Figure S78 (continued).** Kohn Sham molecular orbitals of the anion in **3**.

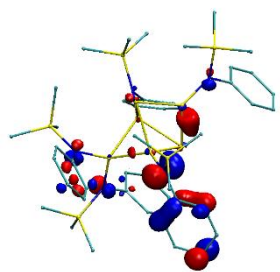

**HOMO-5** (-4.960 eV, side view)

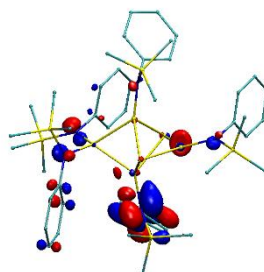

**HOMO-5** (-4.960 eV, top view)

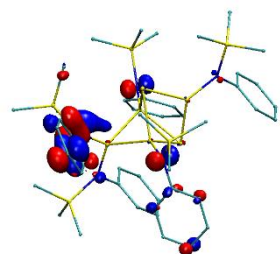

**HOMO-6** (-5.075 eV, side view)

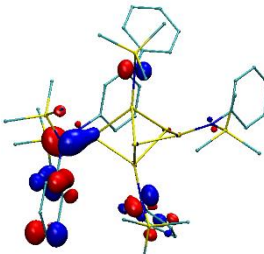

**HOMO-6** (-5.075 eV, top view)

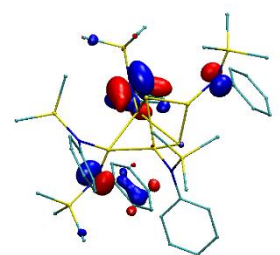

**HOMO-7** (-5.410 eV, side view)

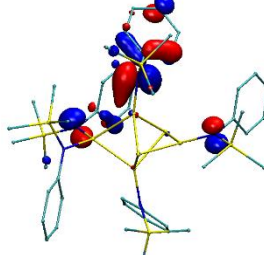

**HOMO-7** (-5.410 eV, top view)

**Figure S78.** Kohn-Sham (frontier) molecular orbitals of the anion in **3** (TPSS-D3/def2-TZVP, 0.04 a.u.).



#### 4.4 Intrinsic bond orbitals of the anion in 3

|         |    |           |      |       |      |       |                |       |                |       |                |       |                |
|---------|----|-----------|------|-------|------|-------|----------------|-------|----------------|-------|----------------|-------|----------------|
| IBO 236 | AB | -0.365279 | SI 5 | 0.970 | SI 4 | 0.948 | SI 2           | 0.032 | (other: 0.050) |       |                |       |                |
| IBO 237 | AB | -0.355419 | SI 2 | 1.096 | SI 3 | 0.819 | SI 5           | 0.026 | (other: 0.059) |       |                |       |                |
| IBO 238 | AB | -0.352912 | SI 2 | 1.091 | SI 1 | 0.823 | SI 5           | 0.028 | (other: 0.058) |       |                |       |                |
| IBO 239 | AB | -0.352328 | SI 6 | 0.968 | SI 5 | 0.913 | SI 2           | 0.059 | SI 4           | 0.027 | (other: 0.033) |       |                |
| IBO 240 | AB | -0.338089 | SI 6 | 0.935 | SI 1 | 0.773 | SI 2           | 0.193 | SI 5           | 0.030 | SI 4           | 0.029 | (other: 0.041) |
| IBO 241 | AB | -0.336673 | SI 6 | 0.950 | SI 3 | 0.768 | SI 2           | 0.186 | SI 4           | 0.032 | SI 5           | 0.025 | (other: 0.040) |
| IBO 242 | AB | -0.334669 | SI 4 | 0.969 | SI 1 | 0.816 | SI 2           | 0.103 | SI 5           | 0.036 | SI 6           | 0.033 | (other: 0.043) |
| IBO 243 | AB | -0.329309 | SI 4 | 0.956 | SI 3 | 0.826 | SI 2           | 0.110 | SI 6           | 0.041 | SI 5           | 0.028 | (other: 0.039) |
| IBO 244 | AB | -0.289914 | SI 3 | 1.941 | SI 1 | 0.026 | (other: 0.033) |       |                |       |                |       |                |
| IBO 245 | AB | -0.277143 | SI 1 | 1.921 | SI 3 | 0.023 | (other: 0.056) |       |                |       |                |       |                |

**Figure S79.** Intrinsic bond orbitals of the anion in **3**.

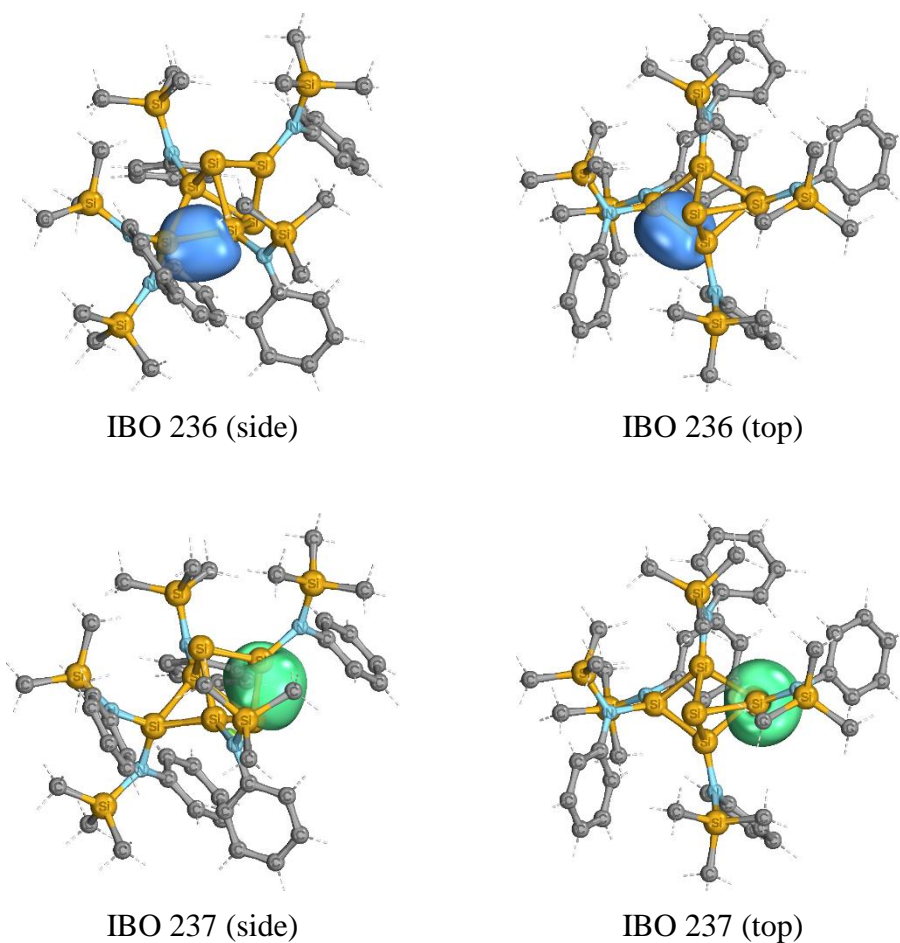

**Figure S79 (continued).** Intrinsic bond orbitals of the anion in **3**.

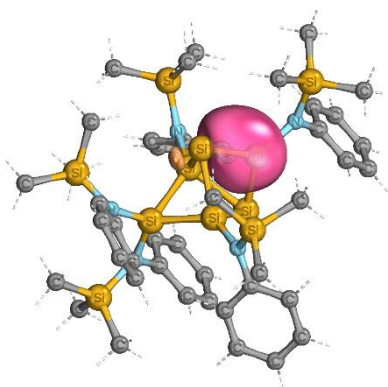

IBO 238 (side)

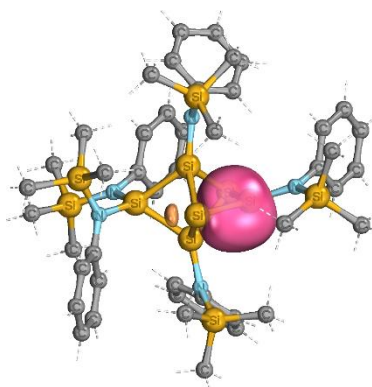

IBO 238 (top)

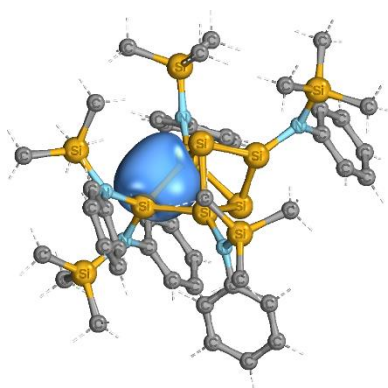

IBO 239 (side)

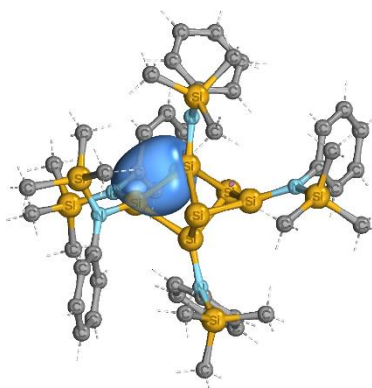

IBO 239 (top)

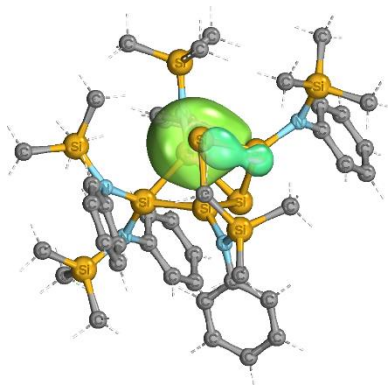

IBO 240 (side)

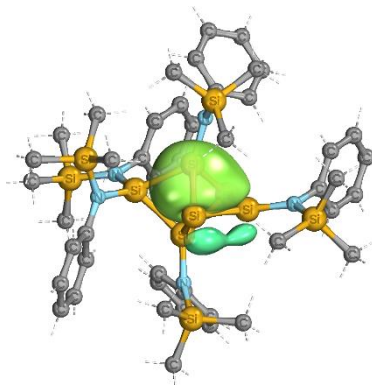

IBO 240 (top)

**Figure S79 (continued).** Intrinsic bond orbitals of the anion in **3**.

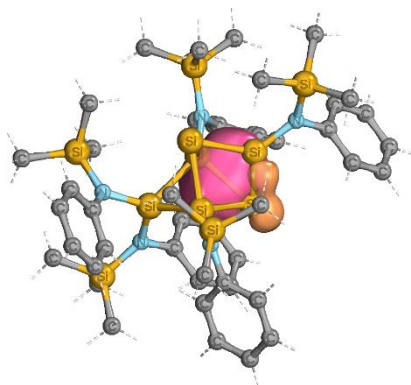

IBO 241 (side)

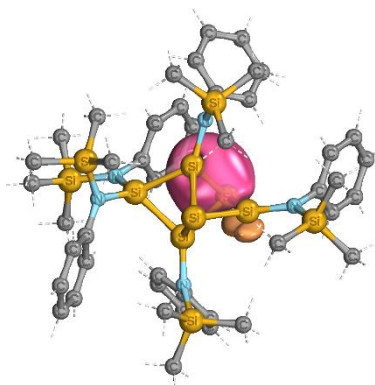

IBO 241 (top)

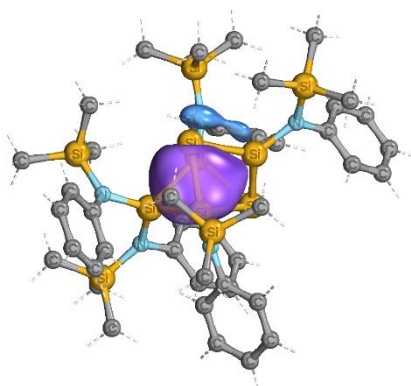

IBO 242 (side)

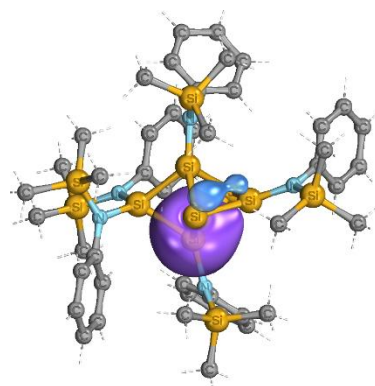

IBO 242 (top)

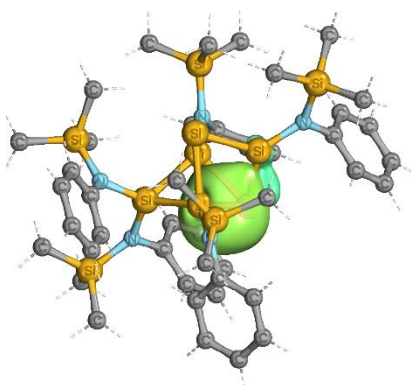

IBO 243 (side)

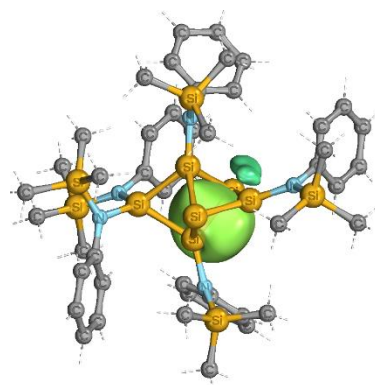

IBO 243 (top)

**Figure S79 (continued).** Intrinsic bond orbitals of the anion in **3**.

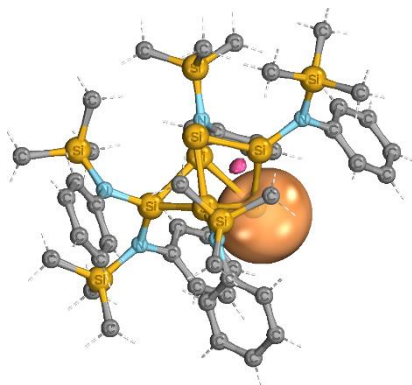

IBO 244 (side)

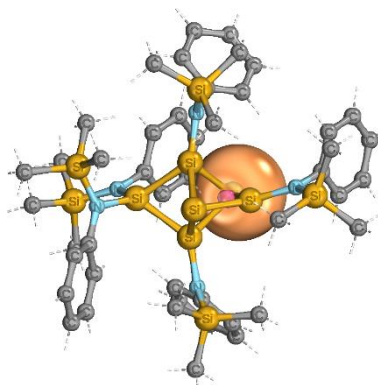

IBO 244 (top)

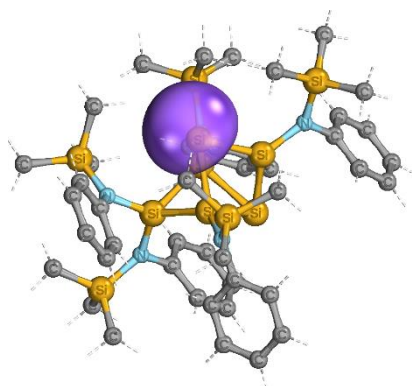

IBO 245 (side)

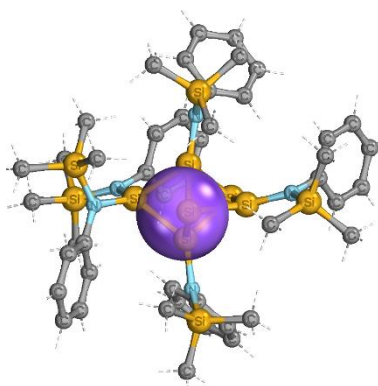

IBO 245 (top)

**Figure S79.** Intrinsic bond orbitals of the anion in **3**.

#### 4.5 Calculated partial charges and bond orders of the anion in **3**

Wiberg bond orders<sup>[S17]</sup> and Mayer bond orders<sup>[S18]</sup> were calculated for the anion in **3**.

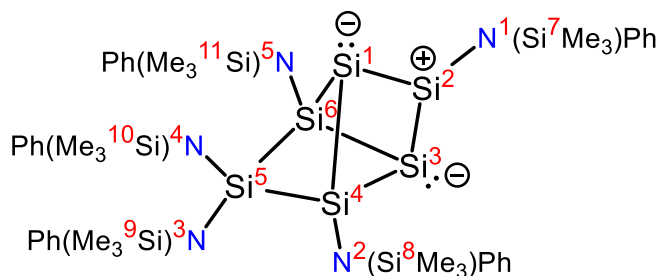

**Table S4.** Wiberg Bond Orders (B.O.) of the anion in **3** in two population analysis schemes (Wiberg and Mayer).

|                  | <b>Wiberg<br/>B.O.</b> | <b>Mayer<br/>B.O.</b> |               | <b>Wiberg<br/>B.O.</b> | <b>Mayer<br/>B.O.</b> |
|------------------|------------------------|-----------------------|---------------|------------------------|-----------------------|
| <i>Si1-Si2</i>   | 1.0017                 | 0.9926                | <i>Si2-N1</i> | 0.5493                 | 0.9220                |
| <i>Si2-Si3</i>   | 1.0130                 | 1.0085                | <i>Si4-N2</i> | 0.5589                 | 0.9312                |
| <i>Si3-Si4</i>   | 0.7629                 | 0.7840                | <i>Si5-N3</i> | 0.5104                 | 1.0881                |
| <i>Si4-Si5</i>   | 0.8715                 | 0.8695                | <i>Si5-N4</i> | 0.4925                 | 1.0024                |
| <i>Si5-Si6</i>   | 0.8263                 | 0.8239                | <i>Si6-N5</i> | 0.5532                 | 0.9228                |
| <i>Si6-Si3</i>   | 0.0767                 | 0.7908                |               |                        |                       |
| <i>Si6-Si1</i>   | 0.0865                 | 0.7363                |               |                        |                       |
| <i>Si1-Si4</i>   | 0.7743                 | 0.8076                |               |                        |                       |
| <i>Si4...Si6</i> | 0.2470                 | 0.2297                |               |                        |                       |
| <i>Si1...Si5</i> | 0.0767                 | -                     |               |                        |                       |
| <i>Si2...Si4</i> | 0.2924                 | 0.2979                |               |                        |                       |
| <i>Si2...Si6</i> | 0.4156                 | 0.3969                |               |                        |                       |

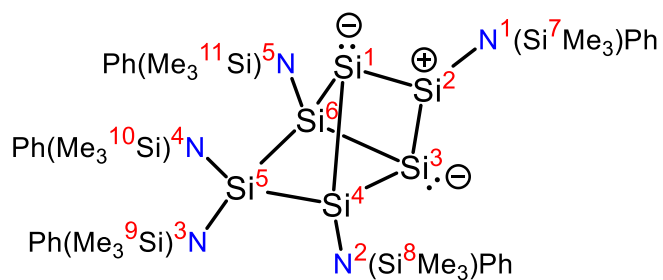

**Table S5.** Partial atomic charges from natural population analysis<sup>[S19]</sup> and from Mayer population analysis.<sup>[S18]</sup>

|            | Q (NPA)  | Q (Mayer) |
|------------|----------|-----------|
| <i>Si1</i> | -0.35607 | -0.3868   |
| <i>Si2</i> | 0.66665  | 0.0860    |
| <i>Si3</i> | -0.34638 | -0.2451   |
| <i>Si4</i> | 0.42884  | 0.1778    |
| <i>Si5</i> | 1.24732  | -0.0996   |
| <i>Si6</i> | 0.45876  | 0.1739    |
| <i>N1</i>  | -1.29738 | -0.2323   |
| <i>N2</i>  | -1.25207 | -0.1760   |
| <i>N3</i>  | -1.34502 | -0.0420   |
| <i>N4</i>  | -1.27886 | 0.0367    |
| <i>N5</i>  | -1.30534 | -0.2235   |

#### 4.6 Calculated $^{29}\text{Si}$ NMR chemical shifts of the anion in **3**

Isotropic chemical shieldings of the anion in **3** were calculated with TPSS/def2-TZVP using the structure optimized with TPSS-D3/def2-TZVP. Isotropic shieldings of  $\text{Si}(\text{CH}_3)_4$  were taken as reference for the chemical shifts.

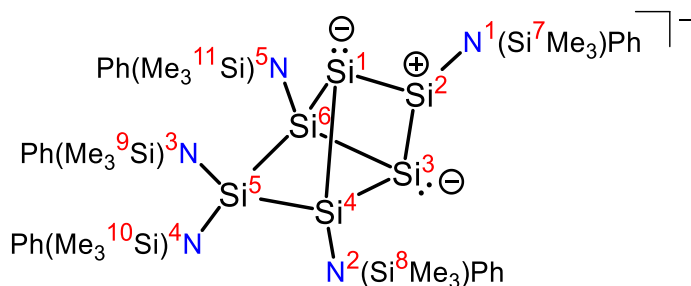

**Table S6.**  $^{29}\text{Si}$ -NMR-chemical shifts<sup>[a]</sup> of the silicon atoms of the anion in **3**.

| Atom            | $\sigma_{\text{iso}}$ /ppm | $\delta$ /ppm |
|-----------------|----------------------------|---------------|
| $\text{SiMe}_4$ | 333.79                     | 0             |
| Si1             | 292.76                     | 40.4          |
| Si2             | 195.72                     | 137.4         |
| Si3             | 273.88                     | 59.2          |
| Si4             | 389.98                     | -56.9         |
| Si5             | 297.68                     | 35.4          |
| Si6             | 394.12                     | -61.0         |
| Si7             | 328.87                     | 4.2           |
| Si8             | 324.54                     | 8.6           |
| Si9             | 334.12                     | -1.0          |
| Si10            | 332.47                     | 0.6           |
| Si11            | 329.77                     | 3.3           |

[a] TPSS//TPSS-D3/def2-TZVP

#### 4.7 Calculated $^{29}\text{Si}$ NMR chemical shifts of **4**

Isotropic chemical shieldings of **4** were calculated with TPSS/def2-TZVP using the structure optimized with TPSS-D3/def2-TZVP. Isotropic shieldings of  $\text{Si}(\text{CH}_3)_4$  were taken as reference for the chemical shifts.

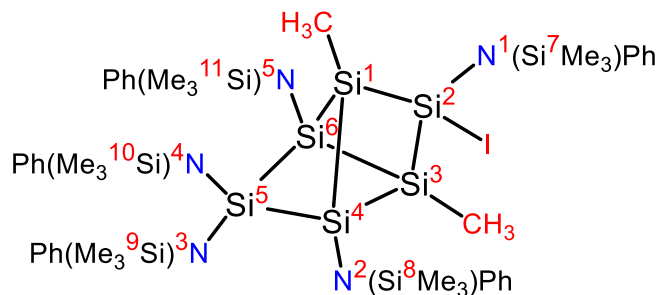

**Table S7.**  $^{29}\text{Si}$ -NMR-chemical shifts<sup>[a]</sup> of the silicon atoms of **4**.

| Atom            | $\sigma_{\text{iso}}$ /ppm | $\delta$ /ppm |
|-----------------|----------------------------|---------------|
| $\text{SiMe}_4$ | 333.79                     | 0             |
| Si1             | 414.25                     | -80.5         |
| Si2             | 313.21                     | 20.6          |
| Si3             | 407.77                     | -74.0         |
| Si4             | 374.00                     | -40.2         |
| Si5             | 327.83                     | 6.0           |
| Si6             | 387.87                     | -54.1         |
| Si7             | 325.98                     | 7.8           |
| Si8             | 323.64                     | 10.2          |
| Si9             | 330.78                     | 3.0           |
| Si10            | 329.33                     | 4.5           |
| Si11            | 322.34                     | 11.5          |

[a] TPSS//TPSS-D3/def2-TZVP



#### 4.8 Calculated $^{29}\text{Si}$ NMR chemical shifts of **5**

Isotropic chemical shieldings of **5** were calculated with TPSS/def2-TZVP using the structure optimized with TPSS-D3/def2-TZVP. Isotropic shieldings of  $\text{Si}(\text{CH}_3)_4$  were taken as reference for the chemical shifts.

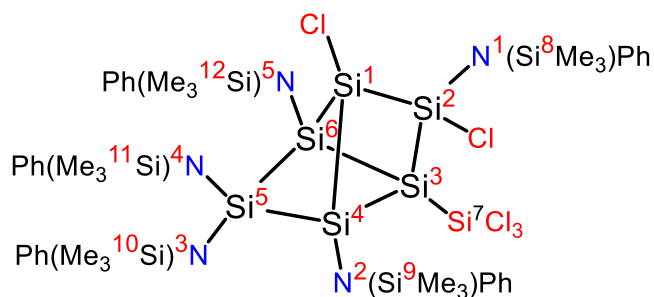

**Table S8.**  $^{29}\text{Si}$ -NMR-chemical shifts<sup>[a]</sup> of the silicon atoms of **5**.

| Atom            | $\sigma_{\text{iso}}$ /ppm | $\delta$ /ppm |
|-----------------|----------------------------|---------------|
| $\text{SiMe}_4$ | 333.79                     | 0             |
| Si1             | 381.12                     | -47.3         |
| Si2             | 299.65                     | 34.1          |
| Si3             | 472.00                     | -138.2        |
| Si4             | 372.47                     | -38.7         |
| Si5             | 336.41                     | -2.6          |
| Si6             | 378.62                     | -44.8         |
| Si7             | 303.40                     | 30.4          |
| Si8             | 325.15                     | 8.6           |
| Si9             | 322.81                     | 11.0          |
| Si10            | 328.32                     | 5.5           |
| Si11            | 330.58                     | 3.2           |
| Si12            | 320.36                     | 13.4          |

[a] TPSS//TPSS-D3/def2-TZVP

#### 4.9 Calculated $^{29}\text{Si}$ NMR chemical shifts of **6**

Isotropic chemical shieldings of **6** were calculated with TPSS/def2-TZVP using the structure optimized with TPSS-D3/def2-TZVP. Isotropic shieldings of  $\text{Si}(\text{CH}_3)_4$  were taken as reference for the chemical shifts.

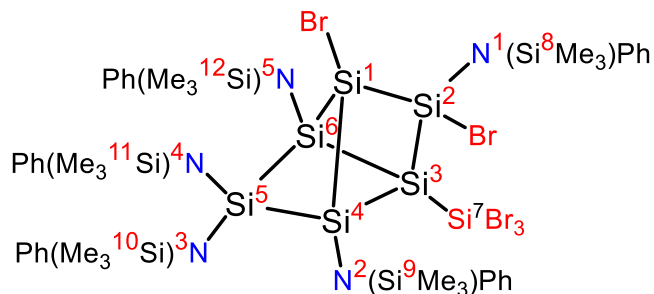

**Table S9.**  $^{29}\text{Si}$ -NMR-chemical shifts<sup>[a]</sup> of the silicon atoms of **6**.

| Atom            | $\sigma_{\text{iso}}$ /ppm | $\delta$ /ppm |
|-----------------|----------------------------|---------------|
| $\text{SiMe}_4$ | 333.79                     | 0             |
| Si1             | 378.47                     | -44.7         |
| Si2             | 295.18                     | 38.6          |
| Si3             | 444.13                     | -110.3        |
| Si4             | 375.42                     | -41.6         |
| Si5             | 338.12                     | -4.3          |
| Si6             | 375.77                     | -42.0         |
| Si7             | 275.19                     | 58.6          |
| Si8             | 324.94                     | 8.9           |
| Si9             | 320.03                     | 13.8          |
| Si10            | 328.50                     | 5.3           |
| Si11            | 328.86                     | 4.9           |
| Si12            | 321.37                     | 12.4          |

[a] TPSS//TPSS-D3/def2-TZVP

#### 4.10 DFT-optimized structure 7

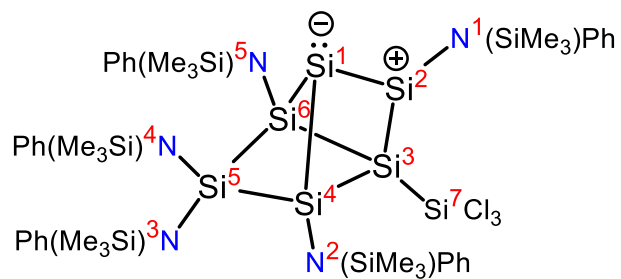

**Table S10.** Partial atomic charges from natural population analysis<sup>[S19]</sup> and from Mayer population analysis.<sup>[S18]</sup>

|            | Q (NPA) |
|------------|---------|
| <i>Si1</i> | -0.24   |
| <i>Si2</i> | 0.91    |
| <i>Si3</i> | -0.43   |
| <i>Si4</i> | 0.65    |
| <i>Si5</i> | 1.37    |
| <i>Si6</i> | 0.55    |
| <i>Si7</i> | 1.06    |
| <i>N1</i>  | -1.30   |
| <i>N2</i>  | -1.31   |
| <i>N3</i>  | -1.34   |
| <i>N4</i>  | -1.32   |
| <i>N5</i>  | -1.29   |

### Calculated $^{29}\text{Si}$ NMR chemical shifts of **7**

Isotropic chemical shieldings of **7** were calculated with TPSS/def2-TZVP using the structure optimized with TPSS-D3/def2-TZVP. Isotropic shieldings of  $\text{Si}(\text{CH}_3)_4$  were taken as reference for the chemical shifts.

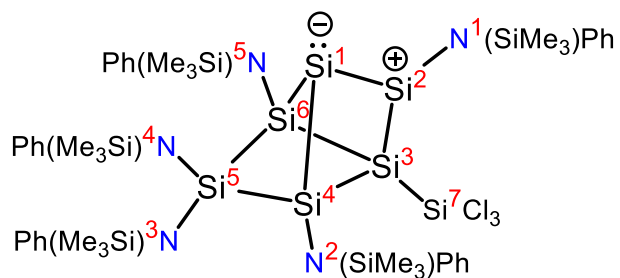

**Table S11.**  $^{29}\text{Si}$ -NMR-chemical shifts<sup>[a]</sup> of the silicon atoms of **7**.

| Atom            | $\sigma_{\text{iso}}$ /ppm | $\delta$ /ppm |
|-----------------|----------------------------|---------------|
| $\text{SiMe}_4$ | 333.79                     | 0             |
| Si1             | 473.02                     | -139.23       |
| Si2             | 184.93                     | 148.87        |
| Si3             | 416.08                     | -82.29        |
| Si4             | 375.70                     | -41.91        |
| Si5             | 296.59                     | 37.20         |
| Si6             | 393.62                     | -59.83        |
| Si7             | 337.84                     | -4.05         |

[a] TPSS//TPSS-D3/def2-TZVP

**Figure S80.** Kohn-Sham (frontier) molecular orbitals of **7** (TPSS-D3/def2-TZVP, 0.04 a.u.).

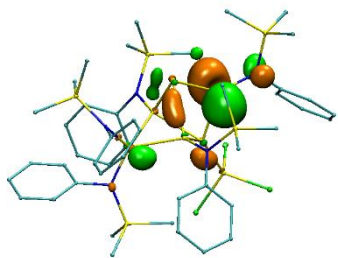

**LUMO** (-2.138 eV, side view)

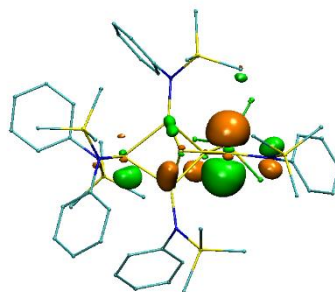

**LUMO** (-2.138 eV, top view)

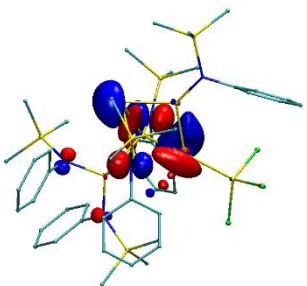

**HOMO** (-4.747 eV, side view)

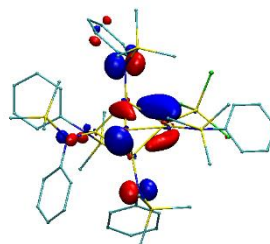

**HOMO** (-4.747 eV, top view)

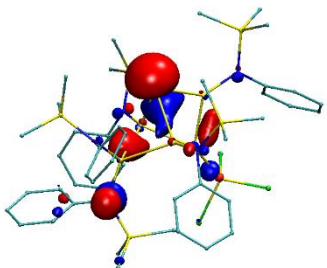

**HOMO-1** (-5.031 eV, side view)

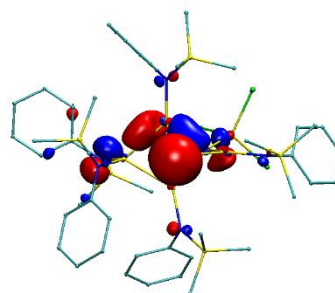

**HOMO-1** (-5.031 eV, top view)

#### 4.11 DFT-optimized isomers $D_{iso}$ and $3_{iso}$

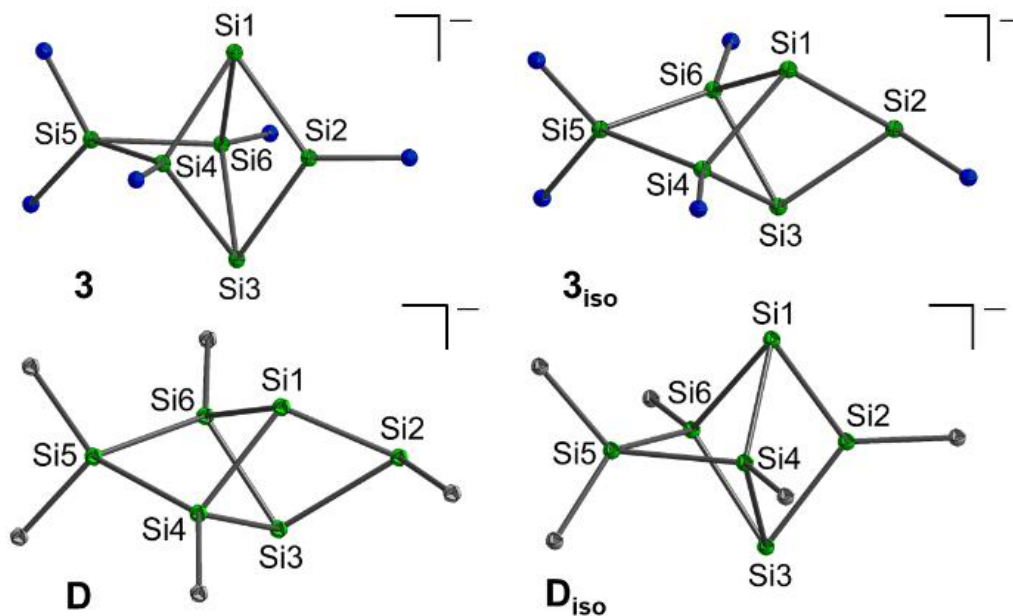

**Figure S81.** Schematic representation of the molecular structures **3**, **3<sub>iso</sub>**, **D** and **D<sub>iso</sub>**.

**Table S12.** NMR chemical shifts vs. TMS (PW6B95/def2-TZVP//TPSS-D3/def2-TZVP)

| <b>D (Si<sub>6</sub>Trips); d(Si1-Si5)=2.585 Å</b> |                |                |
|----------------------------------------------------|----------------|----------------|
|                                                    | $\sigma$ [ppm] | $\delta$ [ppm] |
| <b>si1</b>                                         | 530.31         | -200.8         |
| si2                                                | 204.87         | 124.6          |
| si3                                                | 383.99         | -54.5          |
| <b>si4</b>                                         | -70.70         | 400.2          |
| <b>si5</b>                                         | 563.61         | -234.1         |
| si8                                                | 332.51         | -3.0           |

  

| <b>D<sub>iso</sub> (Si<sub>6</sub>Trips); d(Si1-Si5)=3.6786 Å    <math>\Delta G_{298}^{solv} = +5.96</math> kcal/mol</b> |                |                |
|--------------------------------------------------------------------------------------------------------------------------|----------------|----------------|
|                                                                                                                          | $\sigma$ [ppm] | $\delta$ [ppm] |
| <b>si1</b>                                                                                                               | 214.60         | 114.9          |
| si2                                                                                                                      | 442.61         | -113.1         |
| si3                                                                                                                      | 466.56         | -137.0         |
| <b>si4</b>                                                                                                               | 39.56          | 290.0          |
| <b>si5</b>                                                                                                               | 194.83         | 134.7          |
| si8                                                                                                                      | 271.77         | 57.7           |

**Table S13.** NMR chemical shifts vs. TMS (PW6B95/def2-TZVP//TPSS-D3/def2-TZVP)

**3\_opt**; d(Si1-Si3) = 3.731 Å

|            | $\sigma$ [ppm] | $\delta$ [ppm] |
|------------|----------------|----------------|
| <b>si1</b> | 234.64         | 94.9           |
| <b>si2</b> | 163.05         | 166.5          |
| <b>si3</b> | 216.63         | 112.9          |
| si4        | 395.08         | -65.6          |
| si5        | 383.63         | -54.1          |
| si6        | 292.36         | 37.1           |
| si7        | 327.50         | 2.0            |
| si8        | 326.22         | 3.3            |
| si9        | 321.65         | 7.9            |
| si10       | 332.99         | -3.5           |
| si11       | 330.42         | -0.9           |

**3\_iso**; d(Si1-Si3) = 2.738 Å  $\Delta G^{\text{solv}}_{298} = +7.92$  kcal/mol

|            | $\sigma$ [ppm] | $\delta$ [ppm] |
|------------|----------------|----------------|
| <b>si1</b> | 554.37         | -224.9         |
| <b>si2</b> | -141.59        | 471.1          |
| <b>si3</b> | 594.74         | -265.2         |
| si4        | 142.11         | 187.4          |
| si5        | 339.67         | -10.2          |
| si6        | 316.73         | 12.8           |
| si7        | 332.19         | -2.7           |
| si8        | 324.30         | 5.2            |
| si9        | 321.03         | 8.5            |
| si10       | 330.54         | -1.0           |
| si11       | 327.27         | 2.2            |

**Figure S82.** Kohn-Sham (frontier) molecular orbitals of **3<sub>iso</sub>** (TPSS-D3/def2-TZVP, 0.04 a.u.).

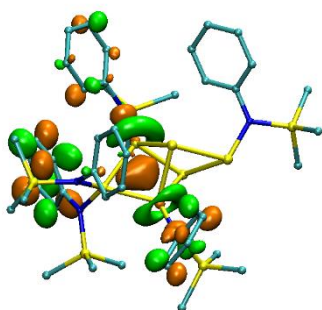

**LUMO+1** (+1.018 eV, side view)

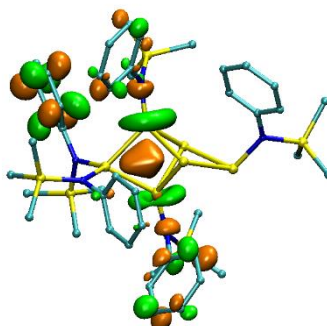

**LUMO+1** (+1.018 eV, top view)

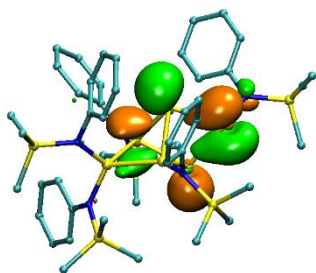

**LUMO** (+0.510 eV, side view)

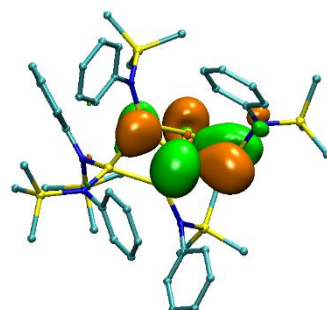

**LUMO** (+0.510 eV, top view)

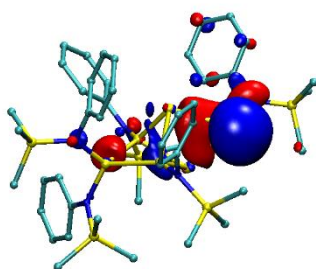

**HOMO** (-1.252 eV, side view)

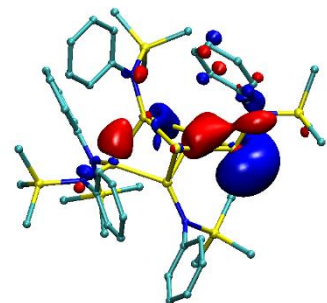

**HOMO** (-1.252 eV, top view)



**Figure S82 (continued).** Kohn-Sham (frontier) molecular orbitals of **3<sub>iso</sub>** (TPSS-D3/def2-TZVP, 0.04 a.u.).

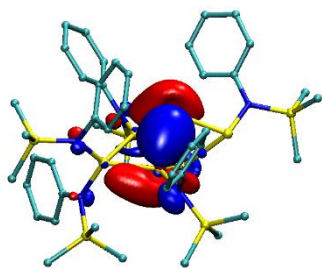

**HOMO-1** (-1.794 eV, side view)

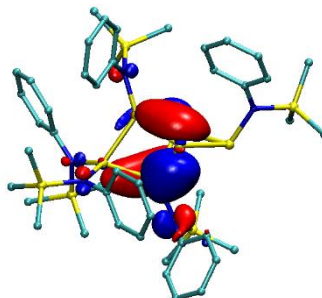

**HOMO-1** (-1.794 eV, top view)

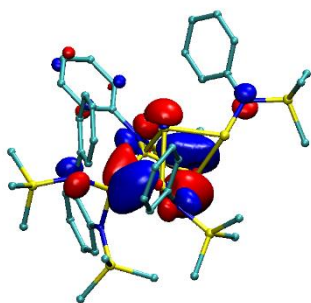

**HOMO-2** (-2.054 eV, side view)

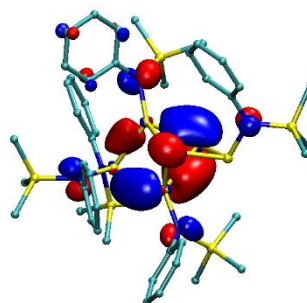

**HOMO-2** (-2.054 eV, top view)

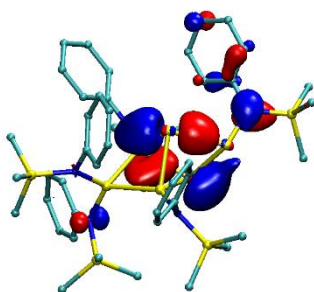

**HOMO-3** (-2.341 eV, side view)

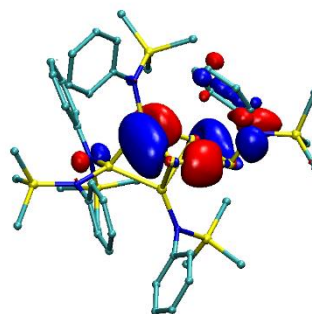

**HOMO-3** (-2.341 eV, top view)

**Figure S82 (continued).** Kohn-Sham (frontier) molecular orbitals of **3<sub>iso</sub>** (TPSS-D3/def2-TZVP, 0.04 a.u.).

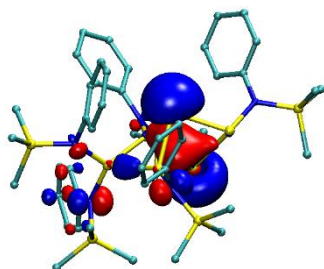

**HOMO-4** (-2.520 eV, side view)

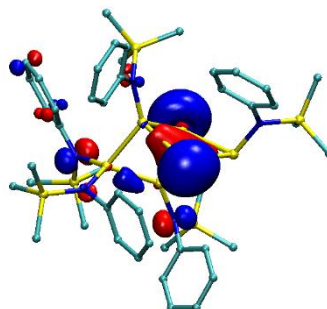

**HOMO-4** (-2.520 eV, top view)

## 4.12 Calculated isomers **3'** and **3<sub>iso</sub>'** and their chemical shielding tensors and orbital imaginary virtual contribution coefficients

Starting from the optimized structures of **3** and **3<sub>iso</sub>** (vide infra) we have replaced all substituents by NH<sub>2</sub> groups, to obtain **3'** and **3<sub>iso</sub>'** and re-optimized all structural parameters except the Si1...Si3 distance which was fixed to 3.727 Å in **3'** and to 2.738 Å in **3<sub>iso</sub>'** using Turbomole Version 7.3<sup>[S14]</sup> at the TPSS(D3/BJ)/def2-TZVP<sup>[S12,S10,S11]</sup> level of theory and using the RI approximation.<sup>[S9]</sup>

At the zero gradient geometries we have calculated the chemical shielding tensors using Turbomoles mpshift module.<sup>[S20]</sup> The following shielding tensors were for the Si1 atom for **3<sub>iso</sub>'** and **3'**.

**3<sub>iso</sub>'**

ATOM si 1 ISOTROPIC: 637.7625485 ANISOTROPIC: 196.6225421

diamagnetic part of magnetic shielding:

Trace = 874.76808881

Tensor :

|              |              |              |
|--------------|--------------|--------------|
| 874.55717265 | -3.81120978  | 0.92604284   |
| -3.74228249  | 874.69602160 | -1.55165903  |
| 0.36462755   | -0.55548488  | 875.05107219 |

paramagnetic undisturbed density part of magnetic shielding:

Trace = 6.73388987

Tensor :

|             |             |             |
|-------------|-------------|-------------|
| 4.22289941  | 1.40970872  | -0.36131673 |
| -4.25280988 | 9.22982680  | -0.49541229 |
| 0.99386491  | -2.02194054 | 6.74894340  |

paramagnetic disturbed density part of magnetic shielding:

Trace = -243.73943022

Tensor :

|               |               |               |
|---------------|---------------|---------------|
| -257.49341820 | 23.70545159   | -73.46955991  |
| 29.47325147   | -217.62501193 | 116.83578527  |
| -20.99714584  | 84.48605643   | -256.09986054 |

total magnetic shielding:

Trace = 637.76254846

Tensor :

|              |              |              |
|--------------|--------------|--------------|
| 621.28665386 | 21.30395053  | -72.90483380 |
| 21.47815910  | 666.30083647 | 114.78871395 |
| -19.63865338 | 81.90863100  | 625.70015505 |

3'

ATOM si 1 ISOTROPIC: 275.0499521 ANISOTROPIC: 553.2410786

diamagnetic part of magnetic shielding:

Trace = 875.14599478

Tensor :

|              |              |              |
|--------------|--------------|--------------|
| 873.71194100 | -0.05273061  | -0.82347129  |
| 0.10958159   | 871.37685571 | -0.56303878  |
| -0.11646651  | -0.53807325  | 880.34918764 |

paramagnetic undisturbed density part of magnetic shielding:

Trace = 6.25585837

Tensor :

|            |            |            |
|------------|------------|------------|
| 6.41767874 | 1.54789250 | 0.89017181 |
| 1.87733974 | 8.52763721 | 0.77486046 |
| 2.11989579 | 0.31869336 | 3.82225915 |

paramagnetic disturbed density part of magnetic shielding:

Trace = -606.35190104

Tensor :

|               |               |               |
|---------------|---------------|---------------|
| -856.42407359 | -4.25042732   | 89.82745335   |
| 6.51729309    | -699.83081098 | -17.80674706  |
| 59.30264671   | -12.86688553  | -262.80081854 |

total magnetic shielding:

Trace = 275.04995211

Tensor :

|             |              |              |
|-------------|--------------|--------------|
| 23.70554615 | -2.75526544  | 89.89415387  |
| 8.50421442  | 180.07368193 | -17.59492537 |
| 61.30607599 | -13.08626542 | 621.37062826 |

Orbital imaginary virtual contribution coefficients ( $F_{im}$ , with virtual orbital  $i$  and occupied orbital  $m$ ) to the (paramagnetic) wave function response, as described by G. Monaco, R. Zanasi as well as Steiner and Fowler<sup>[S21,S22]</sup> have been computed using SYSMOIC a program package for the calculation of origin-independent electron current density and derived magnetic properties in molecular systems.<sup>[S23]</sup> module MO808XL. Thereby, the square norms of the largest matrix elements  $|F_{im}|^2 > 15$  in the two conformers have been computed to

| <b>3iso'</b> |     |              | <b>3'</b> |     |              |
|--------------|-----|--------------|-----------|-----|--------------|
| $m$          | $i$ | $ F_{im} ^2$ | $m$       | $i$ | $ F_{im} ^2$ |
| 65           | 74  | 17.9327      | 65        | 75  | 15.5270      |
| 65           | 72  | 18.7265      | 65        | 68  | 54.4939      |
| 65           | 68  | 23.5785      | 65        | 69  | 60.3172      |
| 65           | 69  | 26.1357      | 65        | 67  | 97.3227      |
| 65           | 66  | 155.1367     | 65        | 66  | 107.6409     |

#### Visual analysis of $F_{im}$ matrix elements

For the visual analysis of the most significant matrix elements  $F_{im}$  we have only included the orbitals HOMO (65), LUMO (66) and LUMO+1 (67) of **3'** and HOMO (65) and LUMO (66) of **3iso'**. The molecular orbitals were visualized using VMD.<sup>[S24]</sup>

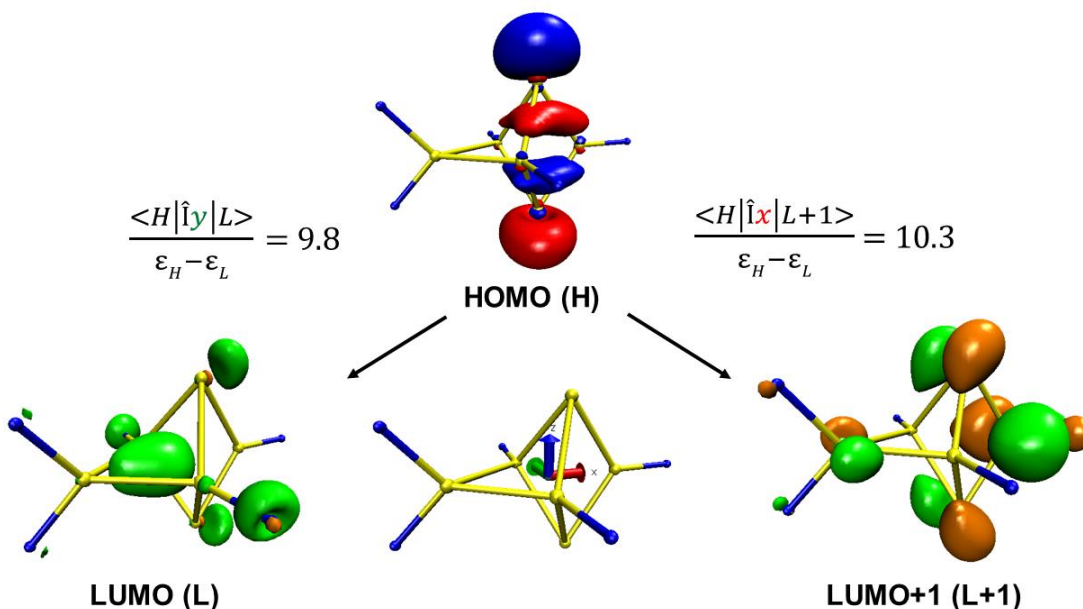

**Figure S83.** Most significant ( $> 7$ , a.u.) paramagnetic response matrix element components  $(F_{i,m})_{\alpha} = \langle m | \hat{l}_{\alpha} | i \rangle / \epsilon_i - \epsilon_m$  in **3'** with long Si1...Si3 distance. The angular momentum axes  $\hat{l}_{\alpha}$  are color coded in red ( $\alpha = x$ ) green ( $\alpha = y$ ) and blue ( $\alpha = z$ ), respectively.

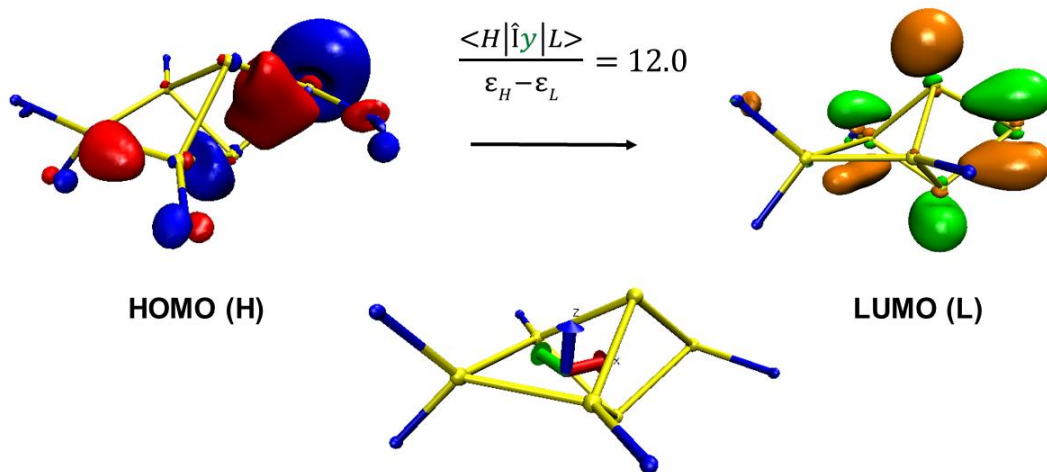

**Figure S84.** Most significant ( $> 7$ , a.u.) paramagnetic response matrix element component  $(F_{i,m})_\alpha = \langle m | \hat{l}_\alpha | i \rangle / \epsilon_i - \epsilon_m$  in  $\mathbf{3}_{iso}'$  with short Si1...Si3 distance. The angular momentum axes  $\hat{l}_\alpha$  are color coded in red ( $\alpha = x$ ) green ( $\alpha = y$ ) and blue ( $\alpha = z$ ).

## 5. References

- [S1] J. Helmer, A. Hepp, F. Lips, *Dalton Trans.* **2022**, 51, 3254–3262.
- [S2] Bruker (2010) SMART APEX (2012-10.6) and (2012) SAINT (Version 8.27a). Bruker AXS Inc., Madison, Wisconsin, USA.
- [S3] An Empirical Correction for Absorption Anisotropy, R. H. Blessing, *Acta Cryst.*, **1995**, A51, 33–38.
- [S4] Sheldrick, G.M., SADABS (2012/1) ‘Siemens Area Detector Absorption Correction’ Universität Göttingen, Göttingen, Germany.
- [S5] Sheldrick, G.M., (2002). SHELXTL. Version 6.1. Siemens Analytical X-ray Instruments Inc., Madison, Wisconsin, USA.
- [S6] Sheldrick, G. M., (1997). SHELXS97. Universität Göttingen: Göttingen, Germany.
- [S7] Sheldrick, G. M., SHELXL2014 structure refinement program.
- [S8] a) P. v. d. Sluis, A. L. Spek, *Acta Crystallogr., Sect. A: Found. Crystallogr.* **1990**, 46, 194–201; b) A. L. Spek, *Acta Cryst.* **2015**, C71, 9–18.
- [S9] R. Ahlrichs, *Phys. Chem. Chem. Phys.* **2004**, 6, 5119–5121.
- [S10] a) S. Grimme, J. Antony, S. Ehrlich, H. Krieg, *J. Chem. Phys.* **2010**, 132, 154104, 1–19. b) S. Grimme, S. Ehrlich, L. Goerigk, *J. Comput. Chem.* **2011**, 32, 1456–1465;
- [S11] F. Weigend, R. Ahlrichs, *Phys. Chem. Chem. Phys.* **2005**, 7, 3297–3305.
- [S12] J. Tao, J. P. Perdew, V. N. Staroverov, G. E. Scuseria, *Phys. Rev. Lett.* **2003**, 91, 146401, 1–4.
- [S13] S. Grimme, *Chem. Eur. J.* **2012**, 18, 9955–9964.
- [S14] TURBOMOLE V7.3, 2018, a development of University of Karlsruhe and Forschungszentrum Karlsruhe GmbH, 1989–2007, TURBOMOLE GmbH.
- [S15] a) F. Neese, The ORCA Program System. *WIREs Comput. Mol. Sci.* **2012**, 2, 73; b) Neese, F. Software update: the ORCA program system, version 4.0. *WIREs Comput. Mol. Sci.* **2017**, 8, e1327.
- [S16] a) G. Knizia, *J. Chem. Theory Comput.* **2013**, 9, 4834–4843; b) G. Knizia, J. E. M. N. Klein, *Angew. Chem. Int. Ed.* **2015**, 54, 5518–5522.
- [S17] K. Wiberg, *Tetrahedron* **1968**, 24, 1083–1096.
- [S18] I. Mayer, *Chem. Phys. Lett.* **1983**, 97, 270–274.
- [S19] A. E. Reed, R. B. Weinstock, F. Weinhold, *J. Chem. Phys.* **1985**, 83, 735–746.
- [S20] M. Kollwitz, J. Gauss, *Chem. Phys. Lett.* **1996**, 260, 639–646.
- [S21] G. Monaco, R. Zanasi, *AIP Conference Proceedings* **2007**, 963, 1302–1305.
- [S22] E. Steiner, A. Soncini, P. W. Fowler, *J. Phys. Chem. A* **2006**, 110, 12882–12886.
- [S23] G. Monaco, F. F. Summa, R. Zanasi, *J. Chem. Inf. Model.* **2021**, 61, 270–283.
- [S24] W. Humphrey, A. Dalke, K. Schulten, *J. Molec. Graphics*, **1996**, 14, 33–38.

## 6. Cartesian Coordinates and Electronic Energies of all Structures

### Anion in 3

E(TPSS-D3/def2-TZVP) = -5217.475420433- + 1.0340058 Hartree

Lowest Freq. = 7.31 cm<sup>-1</sup>

131

Energy =

|    |            |            |            |
|----|------------|------------|------------|
| Si | 6.0922930  | 10.5827496 | 6.5120694  |
| Si | 4.9753753  | 10.4131357 | 4.5112300  |
| Si | 6.5957130  | 10.2602813 | 2.8837439  |
| Si | 7.3361256  | 9.2402622  | 4.9393803  |
| Si | 7.0770531  | 11.8398443 | 4.6801515  |
| Si | 9.1490918  | 10.6926949 | 4.9252541  |
| Si | 2.2304462  | 10.5149673 | 2.9047505  |
| Si | 6.6303208  | 6.4073203  | 3.8766660  |
| Si | 6.1489938  | 14.4281288 | 3.0582101  |
| Si | 11.8619397 | 10.6533159 | 6.6990116  |
| Si | 10.5813809 | 11.9955664 | 2.5554823  |
| N  | 3.2539042  | 10.7823201 | 4.3152883  |
| N  | 7.2351180  | 7.4717306  | 5.1460923  |
| N  | 6.6985838  | 13.5700651 | 4.5021966  |
| N  | 10.1700653 | 11.0012902 | 6.3361435  |
| N  | 10.2172341 | 10.5459260 | 3.5005810  |
| C  | 2.6002447  | 11.2417317 | 5.5072122  |
| C  | 2.3024622  | 10.3499681 | 6.5478001  |
| H  | 2.5499978  | 9.3000455  | 6.4223798  |
| C  | 1.7082342  | 10.8073653 | 7.7241556  |
| H  | 1.4861387  | 10.1041706 | 8.5229616  |
| C  | 1.4034418  | 12.1624905 | 7.8802945  |
| H  | 0.9438617  | 12.5183711 | 8.7982957  |
| C  | 1.7023046  | 13.0569956 | 6.8496774  |
| H  | 1.4831661  | 14.1153526 | 6.9648586  |
| C  | 2.2977945  | 12.6003439 | 5.6732866  |
| H  | 2.5528010  | 13.2949011 | 4.8793776  |
| C  | 3.2451440  | 9.8051983  | 1.4965123  |
| H  | 4.0414801  | 10.4859762 | 1.1791065  |
| H  | 2.5793147  | 9.6233666  | 0.6420037  |
| H  | 3.7177878  | 8.8565989  | 1.7721134  |
| C  | 1.4221744  | 12.1241604 | 2.3502120  |
| H  | 0.7742716  | 12.5379690 | 3.1314405  |
| H  | 0.8036378  | 11.9473460 | 1.4606815  |
| H  | 2.1717834  | 12.8822177 | 2.0954765  |
| C  | 0.8753196  | 9.2961099  | 3.3796250  |
| H  | 1.3070508  | 8.3321565  | 3.6755782  |
| H  | 0.1944993  | 9.1205050  | 2.5370384  |
| H  | 0.2810887  | 9.6707778  | 4.2214447  |
| C  | 7.4374372  | 6.9867278  | 6.4588073  |
| C  | 8.5411362  | 7.4211306  | 7.2140004  |
| H  | 9.2196125  | 8.1448191  | 6.7705372  |
| C  | 8.7636528  | 6.9444221  | 8.5034313  |
| H  | 9.6310956  | 7.2901242  | 9.0605115  |
| C  | 7.8892919  | 6.0192647  | 9.0809861  |
| H  | 8.0656886  | 5.6450762  | 10.0855325 |
| C  | 6.7786487  | 5.5922048  | 8.3481354  |
| H  | 6.0755271  | 4.8872900  | 8.7855333  |
| C  | 6.5493979  | 6.0756173  | 7.0599756  |
| H  | 5.6640662  | 5.7590552  | 6.5169017  |
| C  | 7.2508608  | 4.6560480  | 4.2080323  |
| H  | 8.3448173  | 4.6568775  | 4.2912649  |
| H  | 6.9799691  | 4.0148328  | 3.3590971  |
| H  | 6.8424063  | 4.2035040  | 5.1162246  |
| C  | 4.7454044  | 6.4370661  | 3.8008901  |
| H  | 4.2833276  | 6.0228233  | 4.7045464  |



|   |            |            |            |
|---|------------|------------|------------|
| H | 4.3732676  | 5.8701479  | 2.9376114  |
| H | 4.4033378  | 7.4748602  | 3.6994934  |
| C | 7.3057470  | 6.9074310  | 2.1999299  |
| H | 6.7957916  | 7.7870653  | 1.7933020  |
| H | 7.1625752  | 6.0686008  | 1.5042588  |
| H | 8.3750033  | 7.1348095  | 2.2504060  |
| C | 6.5754992  | 14.3733664 | 5.6873099  |
| C | 7.4212556  | 15.4726674 | 5.8934491  |
| H | 8.2323767  | 15.6527828 | 5.1940673  |
| C | 7.2163224  | 16.3362395 | 6.9721433  |
| H | 7.8760403  | 17.1893611 | 7.1100354  |
| C | 6.1742349  | 16.1025140 | 7.8723855  |
| H | 6.0136059  | 16.7738029 | 8.7117318  |
| C | 5.3481537  | 14.9892407 | 7.6887468  |
| H | 4.5342373  | 14.7951235 | 8.3833534  |
| C | 5.5459159  | 14.1330520 | 6.6079089  |
| H | 4.8905330  | 13.2830767 | 6.4479203  |
| C | 5.4135540  | 13.2749863 | 1.7757607  |
| H | 6.1450527  | 12.6018726 | 1.3190510  |
| H | 4.9617330  | 13.8880184 | 0.9836257  |
| H | 4.6310114  | 12.6523141 | 2.2211378  |
| C | 4.7795781  | 15.6192544 | 3.5735054  |
| H | 3.9636540  | 15.0841088 | 4.0726850  |
| H | 4.3686181  | 16.1124858 | 2.6831588  |
| H | 5.1380269  | 16.3947120 | 4.2586501  |
| C | 7.5248867  | 15.4396691 | 2.2598338  |
| H | 7.8940616  | 16.2196370 | 2.9355971  |
| H | 7.1502734  | 15.9320997 | 1.3524531  |
| H | 8.3734924  | 14.8098335 | 1.9771027  |
| C | 9.4447196  | 11.4982346 | 7.4806567  |
| C | 9.1300814  | 10.6712869 | 8.5647482  |
| H | 9.3880229  | 9.6211802  | 8.5229100  |
| C | 8.4646815  | 11.1840894 | 9.6782835  |
| H | 8.2252672  | 10.5255692 | 10.5097673 |
| C | 8.0878360  | 12.5271062 | 9.7140417  |
| H | 7.5579008  | 12.9256991 | 10.5754080 |
| C | 8.3835973  | 13.3527865 | 8.6270143  |
| H | 8.0767759  | 14.3933835 | 8.6301692  |
| C | 9.0614997  | 12.8436593 | 7.5227371  |
| H | 9.2977021  | 13.4812907 | 6.6772005  |
| C | 12.9525636 | 10.6524329 | 5.1759943  |
| H | 12.6696201 | 9.8934581  | 4.4424085  |
| H | 13.9823507 | 10.4513378 | 5.5008464  |
| H | 12.9411719 | 11.6288238 | 4.6838388  |
| C | 12.0909462 | 8.9935039  | 7.5707728  |
| H | 11.5828817 | 8.9664305  | 8.5407320  |
| H | 13.1604334 | 8.8206964  | 7.7508419  |
| H | 11.7179012 | 8.1563010  | 6.9697452  |
| C | 12.4808677 | 12.0069668 | 7.8544766  |
| H | 12.3605885 | 12.9958237 | 7.3953108  |
| H | 13.5469253 | 11.8588053 | 8.0695474  |
| H | 11.9386661 | 12.0110596 | 8.8061845  |
| C | 10.4962502 | 9.2428394  | 3.0488661  |
| C | 10.6794653 | 8.9309103  | 1.6877562  |
| H | 10.5675676 | 9.7076237  | 0.9386166  |
| C | 10.9788558 | 7.6308242  | 1.2816197  |
| H | 11.1126562 | 7.4259902  | 0.2221228  |
| C | 11.0814786 | 6.5935016  | 2.2125340  |
| H | 11.2987854 | 5.5795290  | 1.8895538  |
| C | 10.8827699 | 6.8836310  | 3.5650801  |
| H | 10.9475386 | 6.0949354  | 4.3102489  |
| C | 10.6070300 | 8.1845716  | 3.9740849  |
| H | 10.4765495 | 8.3984941  | 5.0312715  |

|   |            |            |           |
|---|------------|------------|-----------|
| C | 9.3703406  | 12.2599659 | 1.1397935 |
| H | 9.4661555  | 11.4915351 | 0.3643968 |
| H | 9.5452466  | 13.2350458 | 0.6673624 |
| H | 8.3404245  | 12.2235081 | 1.5106439 |
| C | 12.3127081 | 11.9288397 | 1.8113615 |
| H | 13.0957268 | 11.8984376 | 2.5745545 |
| H | 12.4638311 | 12.8337490 | 1.2078481 |
| H | 12.4503315 | 11.0650759 | 1.1527446 |
| C | 10.4706808 | 13.4523384 | 3.7390144 |
| H | 9.4457438  | 13.6114692 | 4.0932410 |
| H | 10.7909158 | 14.3649264 | 3.2198557 |
| H | 11.1143392 | 13.3103690 | 4.6134171 |

#### 4

E(TPSS-D3/def2-TZVP) = - 5594.941838802 Hartree

140

Energy =

|    |             |            |            |
|----|-------------|------------|------------|
| I  | -5.7037323  | 4.7251185  | 14.2640157 |
| Si | -9.5902909  | 3.9676668  | 13.1964340 |
| Si | -8.1766578  | 5.3029300  | 14.4463904 |
| Si | -9.3154838  | 4.1793335  | 16.1219479 |
| Si | -11.2551112 | 4.4391812  | 14.8346368 |
| Si | -11.7650998 | 2.1334250  | 14.8188597 |
| Si | -9.3992606  | 2.2390599  | 14.7755171 |
| Si | -7.7355456  | 8.0301511  | 13.0313808 |
| Si | -13.0869228 | 6.4808115  | 16.2625410 |
| Si | -13.8250085 | 0.1467661  | 16.3639375 |
| Si | -13.8097347 | 2.4397331  | 12.5167071 |
| Si | -7.3130223  | 0.2101606  | 13.5617142 |
| N  | -8.3164666  | 7.0507107  | 14.3909123 |
| N  | -12.3055084 | 5.8558960  | 14.7961133 |
| N  | -12.5661262 | 1.3828319  | 16.1852568 |
| N  | -12.4681842 | 1.5732039  | 13.2979860 |
| N  | -8.1696873  | 0.9972641  | 14.8985013 |
| C  | -9.0427748  | 4.3198105  | 17.9764508 |
| H  | -8.1099867  | 3.8177961  | 18.2489435 |
| H  | -9.8610816  | 3.8486638  | 18.5227476 |
| H  | -8.9808297  | 5.3743133  | 18.2581693 |
| C  | -9.8133173  | 3.8249239  | 11.3277835 |
| H  | -10.3672851 | 4.6816512  | 10.9343097 |
| H  | -10.3565226 | 2.9077938  | 11.0865886 |
| H  | -8.8321755  | 3.7868072  | 10.8445272 |
| C  | -8.5323916  | 7.7086486  | 15.6456265 |
| C  | -7.6849657  | 7.4720623  | 16.7381079 |
| H  | -6.8423246  | 6.7964542  | 16.6138699 |
| C  | -7.9154903  | 8.1023554  | 17.9601357 |
| H  | -7.2524744  | 7.9040947  | 18.7979022 |
| C  | -8.9806266  | 8.9928489  | 18.1048988 |
| H  | -9.1556414  | 9.4881303  | 19.0552829 |
| C  | -9.8225714  | 9.2360529  | 17.0186945 |
| H  | -10.6649736 | 9.9139546  | 17.1246829 |
| C  | -9.6098411  | 8.5907542  | 15.8015864 |
| H  | -10.2846576 | 8.7453564  | 14.9668774 |
| C  | -8.8521520  | 9.5132435  | 12.7307297 |
| H  | -9.8986565  | 9.2329047  | 12.5754995 |
| H  | -8.5080381  | 10.0385134 | 11.8299964 |
| H  | -8.8083983  | 10.2247432 | 13.5620251 |
| C  | -6.0111650  | 8.6672607  | 13.4114907 |
| H  | -6.0133952  | 9.2497845  | 14.3406833 |
| H  | -5.6455788  | 9.3201075  | 12.6091534 |

|   |             |            |            |
|---|-------------|------------|------------|
| H | -5.3028224  | 7.8414898  | 13.5341161 |
| C | -7.7298706  | 6.9194467  | 11.5170981 |
| H | -7.0811583  | 6.0465755  | 11.6503486 |
| H | -7.3520297  | 7.4827638  | 10.6545227 |
| H | -8.7342806  | 6.5626990  | 11.2665659 |
| C | -12.5969783 | 6.4677919  | 13.5403304 |
| C | -11.5594877 | 6.8408186  | 12.6731417 |
| H | -10.5331433 | 6.6886488  | 12.9967211 |
| C | -11.8404009 | 7.4151982  | 11.4354701 |
| H | -11.0217843 | 7.6942823  | 10.7774236 |
| C | -13.1603503 | 7.6530933  | 11.0472726 |
| H | -13.3772362 | 8.1020948  | 10.0828585 |
| C | -14.1960424 | 7.3117611  | 11.9167430 |
| H | -15.2291009 | 7.4896898  | 11.6301738 |
| C | -13.9199766 | 6.7174867  | 13.1470558 |
| H | -14.7333704 | 6.4211785  | 13.8019475 |
| C | -13.4448341 | 8.3096257  | 16.0130931 |
| H | -12.5666326 | 8.8406897  | 15.6341267 |
| H | -13.7208188 | 8.7583174  | 16.9756488 |
| H | -14.2677015 | 8.4850624  | 15.3138783 |
| C | -11.9234979 | 6.2336623  | 17.7071578 |
| H | -11.7610233 | 5.1749222  | 17.9301497 |
| H | -12.3569667 | 6.6961865  | 18.6036011 |
| H | -10.9519871 | 6.7014637  | 17.5238380 |
| C | -14.7020577 | 5.5915469  | 16.6581629 |
| H | -15.4795289 | 5.7701636  | 15.9073403 |
| H | -15.0896096 | 5.9381769  | 17.6251146 |
| H | -14.5564172 | 4.5081880  | 16.7264178 |
| C | -11.9528369 | 1.6822140  | 17.4603921 |
| C | -12.5507182 | 2.5780805  | 18.3547741 |
| H | -13.4476591 | 3.1061653  | 18.0511891 |
| C | -12.0190423 | 2.7587346  | 19.6331401 |
| H | -12.5021833 | 3.4460555  | 20.3219962 |
| C | -10.8727724 | 2.0647038  | 20.0233154 |
| H | -10.4607688 | 2.2073127  | 21.0179837 |
| C | -10.2438362 | 1.2067696  | 19.1191236 |
| H | -9.3342264  | 0.6826511  | 19.3949726 |
| C | -10.7810585 | 1.0188377  | 17.8476790 |
| H | -10.3141459 | 0.3297871  | 17.1522554 |
| C | -14.6087969 | -0.3786091 | 14.7475000 |
| H | -15.1904992 | 0.4190456  | 14.2804834 |
| H | -15.3043068 | -1.1956928 | 14.9820325 |
| H | -13.8859194 | -0.7552107 | 14.0199932 |
| C | -15.1955836 | 0.7944372  | 17.4825413 |
| H | -14.8434681 | 0.9900189  | 18.5004060 |
| H | -16.0009185 | 0.0512513  | 17.5462732 |
| H | -15.6306863 | 1.7216721  | 17.0908376 |
| C | -13.0604844 | -1.3734627 | 17.1712912 |
| H | -12.2686582 | -1.8021629 | 16.5454460 |
| H | -13.8238224 | -2.1482643 | 17.3164699 |
| H | -12.6266494 | -1.1430118 | 18.1497831 |
| C | -11.8991852 | 0.4322027  | 12.6866410 |
| C | -11.3606104 | -0.6084493 | 13.4664921 |
| H | -11.3719483 | -0.5188248 | 14.5500569 |
| C | -10.8513712 | -1.7579000 | 12.8697861 |
| H | -10.4708213 | -2.5576596 | 13.4983282 |
| C | -10.8455584 | -1.8987008 | 11.4815945 |
| H | -10.4473893 | -2.7969772 | 11.0204500 |
| C | -11.3546800 | -0.8635768 | 10.6972681 |
| H | -11.3440196 | -0.9444907 | 9.6137814  |
| C | -11.8699795 | 0.2878114  | 11.2883854 |
| H | -12.2467874 | 1.0898789  | 10.6612308 |
| C | -14.9282568 | 1.2227945  | 11.6017525 |

|   |             |            |            |
|---|-------------|------------|------------|
| H | -14.7114675 | 1.2099476  | 10.5283923 |
| H | -15.9749562 | 1.5305921  | 11.7203307 |
| H | -14.8372292 | 0.1984593  | 11.9716784 |
| C | -14.7532813 | 3.3054404  | 13.8884771 |
| H | -15.1245505 | 2.6145492  | 14.6508671 |
| H | -15.6149505 | 3.8315354  | 13.4589828 |
| H | -14.1296227 | 4.0535733  | 14.3870801 |
| C | -13.2517871 | 3.7379733  | 11.2823445 |
| H | -12.5877741 | 4.4793912  | 11.7355335 |
| H | -14.1288912 | 4.2776641  | 10.9040120 |
| H | -12.7365627 | 3.3013154  | 10.4202072 |
| C | -7.6125772  | 0.7502313  | 16.2021185 |
| C | -7.8228954  | -0.4791549 | 16.8406958 |
| H | -8.4375763  | -1.2281755 | 16.3511855 |
| C | -7.2547071  | -0.7342111 | 18.0894829 |
| H | -7.4279653  | -1.6925084 | 18.5717601 |
| C | -6.4778109  | 0.2378678  | 18.7210044 |
| H | -6.0378700  | 0.0396476  | 19.6940872 |
| C | -6.2662231  | 1.4649283  | 18.0888426 |
| H | -5.6507950  | 2.2242300  | 18.5639513 |
| C | -6.8236163  | 1.7177573  | 16.8368902 |
| H | -6.6337765  | 2.6564111  | 16.3229440 |
| C | -7.3446227  | -1.6627484 | 13.7553618 |
| H | -6.7400060  | -1.9830391 | 14.6108206 |
| H | -6.9176514  | -2.1273951 | 12.8571002 |
| H | -8.3572459  | -2.0535460 | 13.8819210 |
| C | -5.5079773  | 0.7245353  | 13.5902088 |
| H | -5.3946958  | 1.8018972  | 13.4338123 |
| H | -4.9495123  | 0.2013952  | 12.8033722 |
| H | -5.0415247  | 0.4749129  | 14.5503152 |
| C | -8.1173287  | 0.7360071  | 11.9566578 |
| H | -9.2037082  | 0.6028445  | 11.9644123 |
| H | -7.7165396  | 0.1330936  | 11.1324768 |
| H | -7.8979259  | 1.7854995  | 11.7373030 |

## 5

E(TPSS-D3/def2-TZVP) = - 7808.391815583 Hartree

137

Energy =

|    |            |            |            |
|----|------------|------------|------------|
| Cl | 10.9116817 | 10.7063028 | 17.9371798 |
| Cl | 13.8195288 | 10.3798040 | 9.9842600  |
| Cl | 8.9425854  | 11.8708843 | 13.4160170 |
| Cl | 11.1692396 | 12.2871345 | 10.3109409 |
| Cl | 14.2121753 | 13.5236530 | 10.8422028 |
| Si | 11.5362904 | 11.0099671 | 15.9699911 |
| Si | 10.7622981 | 12.4448768 | 14.3191787 |
| Si | 12.6551768 | 11.4554641 | 13.3930737 |
| Si | 13.8130297 | 11.4527238 | 15.4257239 |
| Si | 14.2545829 | 9.1336949  | 15.2181110 |
| Si | 12.0314062 | 9.3515871  | 14.4208280 |
| Si | 13.0159906 | 11.8823169 | 11.1481361 |
| Si | 9.5207927  | 14.9960917 | 15.5080672 |
| Si | 16.0074558 | 13.6724192 | 15.8248772 |
| Si | 15.5792017 | 7.1686599  | 13.2394408 |
| Si | 13.4941004 | 7.3325915  | 17.7885983 |
| Si | 9.2214921  | 7.8920643  | 14.2150376 |
| N  | 10.7367842 | 14.1605985 | 14.5249071 |
| N  | 14.5684013 | 12.7539615 | 16.3127967 |
| N  | 15.4860784 | 8.7453458  | 14.0424772 |
| N  | 14.5417082 | 8.2401921  | 16.6964286 |
| N  | 10.8970280 | 8.2429729  | 13.7133319 |
| C  | 11.5052302 | 14.9725430 | 13.6136796 |

|   |            |            |            |
|---|------------|------------|------------|
| C | 10.9971744 | 15.3249410 | 12.3577435 |
| H | 10.0327574 | 14.9346560 | 12.0489412 |
| C | 11.7289388 | 16.1652189 | 11.5190677 |
| H | 11.3298801 | 16.4285923 | 10.5438001 |
| C | 12.9686771 | 16.6593589 | 11.9249253 |
| H | 13.5359027 | 17.3136361 | 11.2696271 |
| C | 13.4863807 | 16.2908639 | 13.1671847 |
| H | 14.4597937 | 16.6552718 | 13.4830497 |
| C | 12.7602869 | 15.4472878 | 14.0057114 |
| H | 13.1483701 | 15.1476715 | 14.9730239 |
| C | 8.8719595  | 13.7451698 | 16.7468909 |
| H | 8.3534474  | 12.9162903 | 16.2514325 |
| H | 8.1461509  | 14.2312803 | 17.4111547 |
| H | 9.6621237  | 13.3187128 | 17.3727704 |
| C | 10.3471006 | 16.4591571 | 16.3458198 |
| H | 11.1907050 | 16.1574191 | 16.9747143 |
| H | 9.6264992  | 16.9931093 | 16.9777092 |
| H | 10.7244862 | 17.1688875 | 15.6009302 |
| C | 8.1152731  | 15.6183625 | 14.4285401 |
| H | 8.4689552  | 16.3531051 | 13.6965977 |
| H | 7.3426274  | 16.1032370 | 15.0385188 |
| H | 7.6477560  | 14.7912509 | 13.8831211 |
| C | 13.9870678 | 13.1060277 | 17.5821560 |
| C | 12.7189368 | 13.6960595 | 17.6434601 |
| H | 12.1750061 | 13.8695099 | 16.7181276 |
| C | 12.1685883 | 14.0591936 | 18.8707211 |
| H | 11.1818852 | 14.5115594 | 18.9027775 |
| C | 12.8775505 | 13.8486234 | 20.0539247 |
| H | 12.4451193 | 14.1311374 | 21.0089670 |
| C | 14.1460088 | 13.2725140 | 19.9983079 |
| H | 14.7088449 | 13.1013927 | 20.9118094 |
| C | 14.6972570 | 12.9011354 | 18.7717175 |
| H | 15.6835068 | 12.4516954 | 18.7287844 |
| C | 16.1108187 | 13.5270350 | 13.9701151 |
| H | 16.1711683 | 12.4846781 | 13.6409398 |
| H | 17.0017809 | 14.0374169 | 13.5866873 |
| H | 15.2313804 | 13.9759492 | 13.4992383 |
| C | 15.7730980 | 15.4561603 | 16.3755612 |
| H | 14.8867059 | 15.9287308 | 15.9424824 |
| H | 16.6477579 | 16.0480850 | 16.0767803 |
| H | 15.6858839 | 15.5235352 | 17.4656664 |
| C | 17.5686006 | 13.0455568 | 16.6672848 |
| H | 17.5993428 | 13.3470926 | 17.7207072 |
| H | 18.4546377 | 13.4695206 | 16.1780807 |
| H | 17.6472200 | 11.9569798 | 16.6185980 |
| C | 16.5051525 | 9.6782650  | 13.6525784 |
| C | 16.5453975 | 10.1656947 | 12.3392171 |
| H | 15.7460011 | 9.9032745  | 11.6583545 |
| C | 17.5974144 | 10.9731246 | 11.9091695 |
| H | 17.6033411 | 11.3415911 | 10.8871932 |
| C | 18.6225815 | 11.3174385 | 12.7898997 |
| H | 19.4447917 | 11.9444668 | 12.4577672 |
| C | 18.5730268 | 10.8600340 | 14.1070937 |
| H | 19.3614969 | 11.1257034 | 14.8053627 |
| C | 17.5244826 | 10.0488043 | 14.5399475 |
| H | 17.5086671 | 9.6678905  | 15.5550298 |
| C | 14.4828517 | 5.9802608  | 14.1973024 |
| H | 14.9049535 | 5.7260784  | 15.1724611 |
| H | 14.3560041 | 5.0553835  | 13.6217960 |
| H | 13.4840968 | 6.3972041  | 14.3664676 |
| C | 17.3703885 | 6.5993222  | 13.2639527 |
| H | 18.0005666 | 7.2752717  | 12.6750009 |
| H | 17.4611319 | 5.5958357  | 12.8297664 |

|   |            |            |            |
|---|------------|------------|------------|
| H | 17.7763955 | 6.5708936  | 14.2803501 |
| C | 14.9942964 | 7.2246446  | 11.4573157 |
| H | 14.0049403 | 7.6836269  | 11.3668838 |
| H | 14.9203990 | 6.2040660  | 11.0611691 |
| H | 15.6877188 | 7.7781504  | 10.8158889 |
| C | 15.8755192 | 8.4343642  | 17.2130331 |
| C | 16.1830995 | 9.5860661  | 17.9467605 |
| H | 15.3991904 | 10.3149444 | 18.1237968 |
| C | 17.4728537 | 9.7865259  | 18.4380701 |
| H | 17.7002930 | 10.6839056 | 19.0064503 |
| C | 18.4710673 | 8.8414518  | 18.1970396 |
| H | 19.4771239 | 9.0012879  | 18.5732477 |
| C | 18.1681677 | 7.6888806  | 17.4694609 |
| H | 18.9400360 | 6.9498995  | 17.2735361 |
| C | 16.8781458 | 7.4849528  | 16.9819308 |
| H | 16.6368188 | 6.5964567  | 16.4096156 |
| C | 13.3491965 | 8.2406063  | 19.4265803 |
| H | 14.3230405 | 8.3055814  | 19.9253341 |
| H | 12.6656657 | 7.7107589  | 20.1019521 |
| H | 12.9672365 | 9.2573405  | 19.2917461 |
| C | 14.2484840 | 5.6424512  | 18.1362740 |
| H | 14.3081644 | 5.0220184  | 17.2354417 |
| H | 13.6268525 | 5.1082385  | 18.8664122 |
| H | 15.2548887 | 5.7254987  | 18.5604769 |
| C | 11.8205597 | 7.1013890  | 16.9874426 |
| H | 11.2825267 | 8.0488697  | 16.8905335 |
| H | 11.2064058 | 6.4371221  | 17.6081939 |
| H | 11.9022254 | 6.6503741  | 15.9938544 |
| C | 11.2131769 | 7.6626428  | 12.4274324 |
| C | 11.5001254 | 6.2969731  | 12.3161299 |
| H | 11.5485251 | 5.6916000  | 13.2145211 |
| C | 11.7128017 | 5.7238567  | 11.0627809 |
| H | 11.9354679 | 4.6629092  | 10.9892118 |
| C | 11.6476347 | 6.5077447  | 9.9107157  |
| H | 11.8167581 | 6.0610596  | 8.9354926  |
| C | 11.3689031 | 7.8707370  | 10.0191892 |
| H | 11.3170733 | 8.4918633  | 9.1302123  |
| C | 11.1505024 | 8.4447521  | 11.2697584 |
| H | 10.9008804 | 9.4978614  | 11.3601996 |
| C | 8.7071033  | 8.9393797  | 15.6784718 |
| H | 9.2820637  | 8.7348939  | 16.5849986 |
| H | 7.6569618  | 8.7042187  | 15.8984934 |
| H | 8.7629399  | 10.0104622 | 15.4641648 |
| C | 9.0403634  | 6.0751168  | 14.6765848 |
| H | 9.2164010  | 5.4174496  | 13.8189291 |
| H | 8.0148384  | 5.8928103  | 15.0237099 |
| H | 9.7210636  | 5.7820190  | 15.4820388 |
| C | 8.0944045  | 8.2236845  | 12.7498234 |
| H | 8.1841372  | 9.2564337  | 12.3995451 |
| H | 7.0495946  | 8.0533306  | 13.0390523 |
| H | 8.3207304  | 7.5580937  | 11.9099077 |

6

E(TPSS-D3/def2-TZVP) = - 18377.52518108 Hartree  
137

Energy =

|    |            |           |           |
|----|------------|-----------|-----------|
| Br | 4.1911671  | 9.5682668 | 4.5435106 |
| Br | 7.5026871  | 8.4579209 | 0.9505381 |
| Br | 12.5824703 | 9.7253716 | 4.7596877 |
| Br | 11.7762851 | 7.1451127 | 2.2749711 |
| Br | 12.1961223 | 6.3086544 | 5.7042302 |
| Si | 6.3789251  | 9.0196036 | 4.5257932 |

|    |            |            |            |
|----|------------|------------|------------|
| Si | 7.4589772  | 7.5810015  | 3.0611709  |
| Si | 9.1242536  | 8.3349464  | 4.5116062  |
| Si | 8.2056298  | 10.5218917 | 4.4728842  |
| Si | 8.1593687  | 10.6331296 | 6.8406656  |
| Si | 7.6768083  | 8.3484275  | 6.3859786  |
| Si | 11.3858957 | 7.8882879  | 4.3444838  |
| Si | 5.7081496  | 5.1978093  | 2.1754670  |
| Si | 7.5389356  | 12.6675801 | 2.2361867  |
| Si | 10.7636782 | 10.3796835 | 8.7546256  |
| Si | 6.0053837  | 12.9801732 | 7.1890919  |
| Si | 5.9985763  | 5.8128049  | 7.4134061  |
| N  | 7.1889414  | 5.8815803  | 2.8816218  |
| N  | 8.6198386  | 11.6299006 | 3.1951914  |
| N  | 9.6136655  | 11.1624034 | 7.6590126  |
| N  | 6.7362266  | 11.4050397 | 7.5174818  |
| N  | 7.3514160  | 6.9672347  | 7.3940824  |
| C  | 8.3327439  | 5.0239062  | 3.0481979  |
| C  | 8.8636349  | 4.8087748  | 4.3249414  |
| H  | 8.4135676  | 5.3190322  | 5.1707671  |
| C  | 9.9387776  | 3.9400201  | 4.5025344  |
| H  | 10.3319725 | 3.7704676  | 5.4997030  |
| C  | 10.5104079 | 3.2921978  | 3.4085978  |
| H  | 11.3504831 | 2.6190955  | 3.5498362  |
| C  | 10.0064593 | 3.5311404  | 2.1301562  |
| H  | 10.4611821 | 3.0532347  | 1.2669432  |
| C  | 8.9274842  | 4.3947577  | 1.9471232  |
| H  | 8.5546093  | 4.6040235  | 0.9511159  |
| C  | 5.2413954  | 3.6923548  | 3.1938642  |
| H  | 6.0729530  | 2.9796632  | 3.2408537  |
| H  | 4.3842893  | 3.1745981  | 2.7461822  |
| H  | 4.9742110  | 3.9658628  | 4.2192502  |
| C  | 4.3851804  | 6.5237961  | 2.2463430  |
| H  | 4.1447362  | 6.8444736  | 3.2636932  |
| H  | 3.4652048  | 6.1218296  | 1.8024722  |
| H  | 4.6623711  | 7.4124592  | 1.6683756  |
| C  | 5.9294305  | 4.6878632  | 0.3775282  |
| H  | 6.3812370  | 5.4953030  | -0.2093669 |
| H  | 4.9468605  | 4.4666497  | -0.0593351 |
| H  | 6.5462619  | 3.7901399  | 0.2666940  |
| C  | 9.9828352  | 11.6596598 | 2.7096430  |
| C  | 10.4760410 | 10.6239781 | 1.9089129  |
| H  | 9.8374343  | 9.7733841  | 1.6933119  |
| C  | 11.7569758 | 10.7055798 | 1.3667299  |
| H  | 12.1245489 | 9.8952143  | 0.7455494  |
| C  | 12.5639204 | 11.8142410 | 1.6233935  |
| H  | 13.5636808 | 11.8716319 | 1.2033770  |
| C  | 12.0787782 | 12.8453335 | 2.4270763  |
| H  | 12.6989917 | 13.7126063 | 2.6371732  |
| C  | 10.7930456 | 12.7713807 | 2.9640204  |
| H  | 10.4009140 | 13.5756090 | 3.5752161  |
| C  | 7.7733133  | 12.2861692 | 0.4140048  |
| H  | 8.8108334  | 12.4504060 | 0.1030317  |
| H  | 7.1366014  | 12.9478314 | -0.1873314 |
| H  | 7.5086909  | 11.2511025 | 0.1797818  |
| C  | 7.9616607  | 14.4890536 | 2.4693522  |
| H  | 8.0355269  | 14.7816293 | 3.5202625  |
| H  | 7.1798798  | 15.1029611 | 2.0028507  |
| H  | 8.9080042  | 14.7364986 | 1.9761517  |
| C  | 5.7778962  | 12.3111291 | 2.7548068  |
| H  | 5.4677363  | 11.3129019 | 2.4307759  |
| H  | 5.1025960  | 13.0377746 | 2.2861435  |
| H  | 5.6263853  | 12.3736215 | 3.8364304  |
| C  | 9.8349121  | 12.5817107 | 7.5191958  |

|   |            |            |            |
|---|------------|------------|------------|
| C | 10.4569906 | 13.0769706 | 6.3678947  |
| H | 10.7458297 | 12.3779375 | 5.5895768  |
| C | 10.7241082 | 14.4387557 | 6.2431713  |
| H | 11.2188240 | 14.8114058 | 5.3505401  |
| C | 10.3724230 | 15.3234751 | 7.2645125  |
| H | 10.5825935 | 16.3842893 | 7.1656496  |
| C | 9.7510061  | 14.8347986 | 8.4144560  |
| H | 9.4705504  | 15.5152628 | 9.2136816  |
| C | 9.4807040  | 13.4722601 | 8.5397380  |
| H | 8.9982467  | 13.0849521 | 9.4307456  |
| C | 10.1422397 | 10.3939979 | 10.5326928 |
| H | 10.0291385 | 11.4180563 | 10.9081449 |
| H | 10.8599871 | 9.8799901  | 11.1849205 |
| H | 9.1800631  | 9.8844703  | 10.6297277 |
| C | 12.3640591 | 11.3644928 | 8.6960167  |
| H | 12.7494021 | 11.4300890 | 7.6725837  |
| H | 13.1212174 | 10.8542409 | 9.3055083  |
| H | 12.2527867 | 12.3830063 | 9.0816487  |
| C | 11.0954684 | 8.6407324  | 8.1638283  |
| H | 10.3130490 | 8.2787814  | 7.4894918  |
| H | 11.1690110 | 7.9248033  | 8.9870328  |
| H | 12.0360067 | 8.6177717  | 7.6063822  |
| C | 6.1221726  | 10.6873119 | 8.6055132  |
| C | 5.0221878  | 9.8526980  | 8.3673806  |
| H | 4.6614893  | 9.7429610  | 7.3493166  |
| C | 4.3906247  | 9.2008486  | 9.4252078  |
| H | 3.5281683  | 8.5706034  | 9.2273336  |
| C | 4.8609588  | 9.3539972  | 10.7308503 |
| H | 4.3704436  | 8.8406171  | 11.5525643 |
| C | 5.9662086  | 10.1716126 | 10.9723442 |
| H | 6.3412256  | 10.2977426 | 11.9843992 |
| C | 6.5888238  | 10.8389948 | 9.9175738  |
| H | 7.4358669  | 11.4909780 | 10.0979563 |
| C | 7.0544942  | 13.8778871 | 5.9247782  |
| H | 7.8827982  | 14.4138309 | 6.3966944  |
| H | 6.4397003  | 14.6062043 | 5.3831484  |
| H | 7.4875762  | 13.1973436 | 5.1842219  |
| C | 4.2445230  | 12.7743462 | 6.5648901  |
| H | 4.1952157  | 12.2322234 | 5.6165337  |
| H | 3.7887931  | 13.7620278 | 6.4167512  |
| H | 3.6270731  | 12.2320139 | 7.2900195  |
| C | 5.8834381  | 13.9842695 | 8.7770641  |
| H | 5.2664166  | 13.4756267 | 9.5261247  |
| H | 5.4114468  | 14.9517061 | 8.5617416  |
| H | 6.8639569  | 14.1832028 | 9.2188398  |
| C | 8.2979034  | 6.6815805  | 8.4520815  |
| C | 8.1832713  | 7.3270050  | 9.6874271  |
| H | 7.4154354  | 8.0833661  | 9.8175364  |
| C | 9.0307294  | 6.9775594  | 10.7378198 |
| H | 8.9306294  | 7.4781045  | 11.6965346 |
| C | 9.9993638  | 5.9876852  | 10.5633071 |
| H | 10.6554792 | 5.7152241  | 11.3848023 |
| C | 10.1279293 | 5.3577347  | 9.3246274  |
| H | 10.8915267 | 4.5999713  | 9.1735480  |
| C | 9.2830992  | 5.7051169  | 8.2717270  |
| H | 9.3834225  | 5.2298350  | 7.3025013  |
| C | 5.3201071  | 5.7099840  | 9.1621932  |
| H | 6.0400159  | 5.2330110  | 9.8359894  |
| H | 4.4069379  | 5.1008442  | 9.1661968  |
| H | 5.0778217  | 6.6937551  | 9.5718099  |
| C | 4.6940194  | 6.3772192  | 6.2035956  |
| H | 4.2729217  | 7.3531043  | 6.4587427  |
| H | 3.8727791  | 5.6498894  | 6.1856646  |



|   |           |           |           |
|---|-----------|-----------|-----------|
| H | 5.1004038 | 6.4398357 | 5.1885036 |
| C | 6.5514429 | 4.0714518 | 6.9664537 |
| H | 6.8815175 | 3.9689195 | 5.9298246 |
| H | 5.7020020 | 3.3909419 | 7.1131344 |
| H | 7.3601863 | 3.7254477 | 7.6190592 |

7

E(TPSS-D3/def2-TZVP) = -6887.775312580 + 1.0451231 Hartree

Lowest Freq. = 13.40 cm<sup>-1</sup>

135

Energy =

|    |           |            |            |
|----|-----------|------------|------------|
| Si | 3.0909232 | 5.3693740  | 8.7259950  |
| Si | 4.5235278 | 3.7238124  | 9.4486920  |
| Si | 6.3508364 | 5.0310834  | 9.6160659  |
| Si | 5.2221825 | 5.7709928  | 7.6424526  |
| Si | 5.0351121 | 8.0101377  | 8.3985254  |
| Si | 4.6108654 | 6.5253222  | 10.1962691 |
| Si | 2.8561879 | 1.0935799  | 9.5496211  |
| Si | 4.7548768 | 3.7476457  | 5.2651336  |
| Si | 2.1201615 | 9.3478112  | 8.4298113  |
| Si | 8.0250307 | 9.1713538  | 8.0882282  |
| Si | 3.1207926 | 5.8133905  | 12.8278467 |
| N  | 4.3910901 | 2.0114648  | 9.6127778  |
| N  | 5.5280852 | 5.1304035  | 6.0517519  |
| N  | 3.5695668 | 8.6628958  | 7.6955380  |
| N  | 6.2711820 | 9.2510405  | 8.3388126  |
| N  | 4.2025731 | 6.8415559  | 11.8770992 |
| C  | 5.5637251 | 1.2492426  | 9.9750456  |
| C  | 6.1408173 | 1.4131399  | 11.2380381 |
| H  | 5.7017468 | 2.1235655  | 11.9297886 |
| C  | 7.2589888 | 0.6651017  | 11.6016907 |
| H  | 7.7043824 | 0.8130965  | 12.5805864 |
| C  | 7.8080029 | -0.2575031 | 10.7120778 |
| H  | 8.6808430 | -0.8376562 | 10.9957991 |
| C  | 7.2353587 | -0.4210787 | 9.4507240  |
| H  | 7.6617620 | -1.1286866 | 8.7451845  |
| C  | 6.1200688 | 0.3291480  | 9.0793118  |
| H  | 5.6855667 | 0.2123677  | 8.0930507  |
| C  | 2.8550533 | -0.0532424 | 11.0342414 |
| H  | 1.9259863 | -0.6353393 | 11.0668728 |
| H  | 3.6936305 | -0.7567517 | 11.0025218 |
| H  | 2.9305556 | 0.5152784  | 11.9683363 |
| C  | 1.4122561 | 2.2838104  | 9.6553508  |
| H  | 0.4880634 | 1.6967567  | 9.7408873  |
| H  | 1.4764777 | 2.9337480  | 10.5344880 |
| H  | 1.3201065 | 2.9271127  | 8.7748702  |
| C  | 2.7430366 | 0.1037115  | 7.9572458  |
| H  | 1.7724237 | -0.4053311 | 7.9016982  |
| H  | 2.8304769 | 0.7533972  | 7.0800091  |
| H  | 3.5216120 | -0.6635407 | 7.8940226  |
| C  | 6.6680358 | 5.6773594  | 5.3593809  |
| C  | 7.8713378 | 4.9649486  | 5.2862784  |
| H  | 7.9551868 | 4.0115239  | 5.7986578  |
| C  | 8.9566705 | 5.4918302  | 4.5863670  |
| H  | 9.8876880 | 4.9338237  | 4.5398909  |
| C  | 8.8550359 | 6.7382084  | 3.9664502  |
| H  | 9.7032487 | 7.1510433  | 3.4283288  |
| C  | 7.6594483 | 7.4542252  | 4.0499074  |
| H  | 7.5705174 | 8.4259263  | 3.5722993  |
| C  | 6.5690802 | 6.9281061  | 4.7406373  |
| H  | 5.6345267 | 7.4739374  | 4.8025424  |

|   |            |            |            |
|---|------------|------------|------------|
| C | 5.5755032  | 2.1457879  | 5.8112988  |
| H | 5.0455806  | 1.2692536  | 5.4177785  |
| H | 6.6174521  | 2.0840677  | 5.4791929  |
| H | 5.5708212  | 2.0777304  | 6.9048480  |
| C | 4.9556461  | 3.9879987  | 3.4134055  |
| H | 4.4293021  | 3.1930708  | 2.8706695  |
| H | 4.5390552  | 4.9505540  | 3.0965302  |
| H | 6.0070561  | 3.9652540  | 3.1091382  |
| C | 2.9270206  | 3.6330594  | 5.6768597  |
| H | 2.4888392  | 2.8321254  | 5.0660058  |
| H | 2.7429568  | 3.3899751  | 6.7277432  |
| H | 2.3889153  | 4.5585983  | 5.4527970  |
| C | 3.5599434  | 8.6345516  | 6.2524663  |
| C | 2.9709529  | 7.5565891  | 5.5779741  |
| H | 2.5399594  | 6.7540646  | 6.1689473  |
| C | 2.9463350  | 7.5210259  | 4.1850305  |
| H | 2.4860871  | 6.6783592  | 3.6765534  |
| C | 3.5156742  | 8.5591102  | 3.4448553  |
| H | 3.5033376  | 8.5275890  | 2.3593221  |
| C | 4.1056589  | 9.6349756  | 4.1104469  |
| H | 4.5511488  | 10.4478940 | 3.5431517  |
| C | 4.1260854  | 9.6750234  | 5.5052531  |
| H | 4.5705661  | 10.5105209 | 6.0325613  |
| C | 0.6018807  | 8.4618548  | 7.7611914  |
| H | -0.3047679 | 8.8510442  | 8.2420499  |
| H | 0.4888219  | 8.5971187  | 6.6800728  |
| H | 0.6596917  | 7.3861337  | 7.9659806  |
| C | 2.0092093  | 11.1727359 | 7.9966959  |
| H | 1.0901890  | 11.6141301 | 8.4030068  |
| H | 2.8620436  | 11.7259483 | 8.4038614  |
| H | 1.9963066  | 11.3226258 | 6.9107800  |
| C | 2.1905847  | 9.1257775  | 10.2852494 |
| H | 1.3317740  | 9.6388419  | 10.7375450 |
| H | 2.1376693  | 8.0706202  | 10.5668734 |
| H | 3.0975733  | 9.5514333  | 10.7220402 |
| C | 5.8311816  | 10.5432477 | 8.8074411  |
| C | 5.8568565  | 11.6662298 | 7.9686309  |
| H | 6.1939650  | 11.5553358 | 6.9443330  |
| C | 5.4601553  | 12.9152176 | 8.4446449  |
| H | 5.4861424  | 13.7740255 | 7.7795002  |
| C | 5.0173078  | 13.0615284 | 9.7602101  |
| H | 4.6997995  | 14.0335029 | 10.1260215 |
| C | 4.9905339  | 11.9481850 | 10.6001911 |
| H | 4.6615505  | 12.0441854 | 11.6305903 |
| C | 5.4046947  | 10.7025180 | 10.1318407 |
| H | 5.4292700  | 9.8470398  | 10.7996487 |
| C | 8.5610425  | 7.4193390  | 7.7424347  |
| H | 9.6517555  | 7.3532513  | 7.8316128  |
| H | 8.1319476  | 6.6985635  | 8.4437543  |
| H | 8.2886258  | 7.1106133  | 6.7320210  |
| C | 8.8577670  | 9.8395229  | 9.6338169  |
| H | 9.9494209  | 9.7994721  | 9.5331328  |
| H | 8.5740350  | 10.8806001 | 9.8234706  |
| H | 8.5766588  | 9.2519668  | 10.5133460 |
| C | 8.5435675  | 10.2259408 | 6.6137068  |
| H | 9.5815667  | 9.9870036  | 6.3477675  |
| H | 7.9215431  | 10.0122198 | 5.7377924  |
| H | 8.4949922  | 11.2993481 | 6.8231808  |
| C | 4.9781183  | 7.8669779  | 12.5066522 |
| C | 6.3785632  | 7.8349643  | 12.4605750 |
| H | 6.8706234  | 7.0019844  | 11.9683846 |
| C | 7.1346968  | 8.8484809  | 13.0457086 |
| H | 8.2185857  | 8.7999210  | 12.9979619 |

|    |           |            |            |
|----|-----------|------------|------------|
| C  | 6.5049579 | 9.9092929  | 13.6969370 |
| H  | 7.0930169 | 10.7007272 | 14.1514335 |
| C  | 5.1106131 | 9.9459119  | 13.7527314 |
| H  | 4.6073747 | 10.7701351 | 14.2513311 |
| C  | 4.3511111 | 8.9421446  | 13.1543584 |
| H  | 3.2675087 | 8.9905243  | 13.1672066 |
| C  | 3.7678252 | 4.0449479  | 12.8339901 |
| H  | 3.2194320 | 3.4382481  | 13.5660383 |
| H  | 3.6492345 | 3.5529320  | 11.8609364 |
| H  | 4.8312644 | 4.0211122  | 13.0960144 |
| C  | 1.3787859 | 5.8342636  | 12.1284503 |
| H  | 0.7525774 | 5.0977102  | 12.6479076 |
| H  | 0.9115287 | 6.8178303  | 12.2484770 |
| H  | 1.3689180 | 5.5876209  | 11.0598891 |
| C  | 3.1135129 | 6.3970147  | 14.6142696 |
| H  | 2.5846817 | 5.6498898  | 15.2199695 |
| H  | 4.1291962 | 6.4936176  | 15.0130489 |
| H  | 2.6066104 | 7.3561045  | 14.7545013 |
| Si | 8.3755541 | 4.6154772  | 10.6980158 |
| Cl | 9.4408098 | 3.0898151  | 9.8120266  |
| Cl | 7.9721163 | 4.0738679  | 12.6607858 |
| Cl | 9.6436240 | 6.2409576  | 10.8750075 |

Cartesian coordinates in units of Å

#### D

196

Energy =

|    |            |            |            |
|----|------------|------------|------------|
| Si | 1.5660198  | 0.4900277  | -1.4377168 |
| Si | -0.1713938 | 1.0544608  | 0.0176808  |
| Si | 1.6733284  | -1.1496713 | 0.2521730  |
| Si | 3.5272948  | 1.6741637  | -0.7090243 |
| Si | 1.9619536  | 1.0264948  | 1.0595744  |
| C  | 3.1485307  | 3.4084714  | -1.5103806 |
| C  | 2.8127967  | -2.6727610 | 0.1543031  |
| Si | -0.6504993 | -1.1957673 | 0.5318336  |
| C  | -1.6643480 | -1.2745277 | 2.1610413  |
| C  | -1.4084215 | -2.5612498 | -0.5953282 |
| C  | -1.2457032 | 2.6160415  | 0.1793470  |
| C  | 2.7149802  | -3.5566676 | -0.9525292 |
| C  | 3.7199539  | -2.9941182 | 1.1949412  |
| C  | 3.4646330  | -4.7352825 | -0.9705130 |
| C  | 1.8636363  | -3.2210697 | -2.1670967 |
| C  | 4.3204899  | -5.0808787 | 0.0754240  |
| H  | 3.3671736  | -5.4055877 | -1.8214033 |
| C  | 4.4453445  | -4.1891345 | 1.1389093  |
| C  | 5.0828669  | -6.3932877 | 0.0679690  |
| H  | 5.1278844  | -4.4395754 | 1.9482181  |
| C  | 3.9734906  | -2.0260107 | 2.3386162  |
| C  | 2.7383449  | -2.5098216 | -3.2162277 |
| C  | 1.1446766  | -4.4259694 | -2.7863604 |
| H  | 1.0945080  | -2.5109529 | -1.8405946 |
| H  | 3.1930883  | -1.6086449 | -2.7937160 |
| H  | 2.1384336  | -2.2162806 | -4.0858753 |
| H  | 3.5390417  | -3.1783974 | -3.5567160 |
| H  | 1.8486352  | -5.1271977 | -3.2515415 |
| H  | 0.4582563  | -4.0809113 | -3.5663345 |
| H  | 0.5576068  | -4.9655676 | -2.0385655 |
| C  | 6.0113158  | -6.5105384 | -1.1533936 |
| C  | 4.1180610  | -7.5915256 | 0.1381792  |

|   |            |            |            |
|---|------------|------------|------------|
| H | 5.7085304  | -6.4097903 | 0.9708911  |
| H | 3.4695233  | -7.6147802 | -0.7448688 |
| H | 3.4754741  | -7.5230379 | 1.0218377  |
| H | 4.6718292  | -8.5377351 | 0.1799454  |
| H | 5.4319764  | -6.5035298 | -2.0835349 |
| H | 6.5832668  | -7.4460016 | -1.1188550 |
| H | 6.7149156  | -5.6727891 | -1.1906486 |
| C | 4.4025685  | -2.6989680 | 3.6496017  |
| C | 5.0193328  | -0.9791387 | 1.9122540  |
| H | 3.0359811  | -1.4835821 | 2.5170362  |
| H | 5.9779143  | -1.4687590 | 1.6990957  |
| H | 5.1721978  | -0.2430084 | 2.7105372  |
| H | 4.7012418  | -0.4384449 | 1.0147049  |
| H | 3.7412337  | -3.5297815 | 3.9169183  |
| H | 4.3857268  | -1.9671500 | 4.4650328  |
| H | 5.4256165  | -3.0891081 | 3.5852562  |
| C | -1.6557362 | 3.3642983  | -0.9507913 |
| C | -1.5627692 | 3.1125664  | 1.4717721  |
| C | -2.2999058 | 4.5934721  | -0.7709165 |
| C | -1.4068040 | 2.8770819  | -2.3693644 |
| C | -2.5845117 | 5.1028376  | 0.4941959  |
| H | -2.5919756 | 5.1751713  | -1.6432639 |
| C | -2.2209052 | 4.3368373  | 1.6025410  |
| C | -3.2712957 | 6.4468050  | 0.6551963  |
| H | -2.4462770 | 4.7053097  | 2.6015201  |
| C | -1.2000491 | 2.3612130  | 2.7455794  |
| C | -0.1692274 | 3.5488467  | -2.9807305 |
| C | -2.6296611 | 3.0730813  | -3.2803682 |
| H | -1.1945011 | 1.8021548  | -2.3061549 |
| H | -0.2948550 | 4.6367787  | -3.0071564 |
| H | -0.0057500 | 3.1938495  | -4.0049260 |
| H | 0.7271774  | 3.3283226  | -2.3968955 |
| H | -3.5387581 | 2.6630479  | -2.8282317 |
| H | -2.4622934 | 2.5751184  | -4.2424886 |
| H | -2.8050866 | 4.1345706  | -3.4906326 |
| C | -4.6236890 | 6.3084576  | 1.3767514  |
| C | -2.3645732 | 7.4560853  | 1.3825445  |
| H | -3.4652520 | 6.8338220  | -0.3544980 |
| H | -5.1285457 | 7.2798202  | 1.4470776  |
| H | -4.4826425 | 5.9262821  | 2.3941583  |
| H | -5.2802263 | 5.6116945  | 0.8455615  |
| H | -2.8561939 | 8.4335374  | 1.4619366  |
| H | -1.4165518 | 7.5838589  | 0.8513559  |
| H | -2.1342965 | 7.1080521  | 2.3958026  |
| C | -2.4020350 | 2.1728497  | 3.6844883  |
| C | -0.0519479 | 3.0613458  | 3.4894437  |
| H | -0.8506772 | 1.3626917  | 2.4542931  |
| H | -2.7454654 | 3.1315630  | 4.0920306  |
| H | -2.1147325 | 1.5310284  | 4.5235135  |
| H | -3.2403462 | 1.6972574  | 3.1711725  |
| H | 0.8554358  | 3.0710088  | 2.8782338  |
| H | 0.1715761  | 2.5401952  | 4.4271116  |
| H | -0.3244471 | 4.0961379  | 3.7287946  |
| C | 3.5072397  | 3.5361079  | -2.8773574 |
| C | 2.6304537  | 4.5650576  | -0.8631355 |
| C | 3.3278355  | 4.7465083  | -3.5554601 |
| C | 4.0568056  | 2.3524824  | -3.6641845 |
| C | 2.8096323  | 5.8727433  | -2.9234528 |
| H | 3.5871453  | 4.8108073  | -4.6125142 |
| C | 2.4760271  | 5.7585078  | -1.5710095 |
| C | 2.5957550  | 7.1704757  | -3.6817240 |
| H | 2.0620805  | 6.6241710  | -1.0601342 |
| C | 2.2347770  | 4.5107370  | 0.6027127  |

|   |            |            |            |
|---|------------|------------|------------|
| C | 5.4073860  | 2.6698307  | -4.3252262 |
| C | 3.0352928  | 1.8363283  | -4.6891671 |
| H | 4.2352965  | 1.5367498  | -2.9453769 |
| H | 2.1106944  | 1.5371229  | -4.1848929 |
| H | 3.4307175  | 0.9642758  | -5.2252121 |
| H | 2.7919307  | 2.6129913  | -5.4248701 |
| H | 5.3112872  | 3.4678219  | -5.0713917 |
| H | 5.8028709  | 1.7813005  | -4.8326603 |
| H | 6.1368911  | 2.9933499  | -3.5754410 |
| C | 1.1027674  | 7.5402324  | -3.7551983 |
| C | 3.4112537  | 8.3268206  | -3.0758924 |
| H | 2.9530424  | 7.0081858  | -4.7083379 |
| H | 0.6934148  | 7.6905440  | -2.7496345 |
| H | 0.5277701  | 6.7409685  | -4.2332051 |
| H | 0.9547798  | 8.4663422  | -4.3253411 |
| H | 4.4775418  | 8.0794742  | -3.0504370 |
| H | 3.2793186  | 9.2474017  | -3.6586670 |
| H | 3.0898956  | 8.5285926  | -2.0476863 |
| C | 1.2908854  | 5.6322427  | 1.0477241  |
| C | 3.4831928  | 4.4611793  | 1.5003964  |
| H | 1.6999556  | 3.5592552  | 0.7404107  |
| H | 0.9662036  | 5.4571173  | 2.0778142  |
| H | 0.3980776  | 5.6706805  | 0.4165376  |
| H | 1.7825380  | 6.6132827  | 1.0199572  |
| H | 4.1422861  | 3.6359744  | 1.2088362  |
| H | 4.0474148  | 5.3988334  | 1.4184239  |
| H | 3.2010568  | 4.3116518  | 2.5497576  |
| C | -1.9425489 | -2.3461556 | -1.8909457 |
| C | -1.4209096 | -3.8871525 | -0.0901718 |
| C | -2.4790092 | -3.4132026 | -2.6168161 |
| C | -1.9549708 | -0.9792644 | -2.5561031 |
| C | -2.5264019 | -4.7098468 | -2.1073371 |
| H | -2.8748602 | -3.2199141 | -3.6121060 |
| C | -1.9896456 | -4.9219129 | -0.8409494 |
| C | -3.1225235 | -5.8541378 | -2.9060937 |
| H | -2.0058530 | -5.9297642 | -0.4281130 |
| C | -0.8502749 | -4.2556648 | 1.2729021  |
| C | -0.9471592 | -0.9205593 | -3.7148413 |
| C | -3.3562846 | -0.5770452 | -3.0431624 |
| H | -1.6295655 | -0.2464884 | -1.8062175 |
| H | 0.0650009  | -1.1301563 | -3.3583075 |
| H | -0.9409619 | 0.0767037  | -4.1694355 |
| H | -1.2049481 | -1.6529512 | -4.4902435 |
| H | -3.7245157 | -1.2681659 | -3.8100957 |
| H | -3.3301392 | 0.4239221  | -3.4821195 |
| H | -4.0771155 | -0.5730118 | -2.2209935 |
| C | -2.3224455 | -6.1153217 | -4.1950709 |
| C | -4.6077520 | -5.6065127 | -3.2242655 |
| H | -3.0563522 | -6.7543267 | -2.2797329 |
| H | -4.7256925 | -4.7160787 | -3.8521190 |
| H | -5.1822446 | -5.4467894 | -2.3061324 |
| H | -5.0385591 | -6.4596999 | -3.7625461 |
| H | -1.2724450 | -6.3231904 | -3.9676031 |
| H | -2.7375368 | -6.9689599 | -4.7449224 |
| H | -2.3549884 | -5.2398820 | -4.8536076 |
| C | -1.9774733 | -4.6657040 | 2.2372402  |
| C | 0.2255271  | -5.3510213 | 1.1805058  |
| H | -0.3586268 | -3.3676443 | 1.6845195  |
| H | -2.7017999 | -3.8559701 | 2.3591105  |
| H | -1.5735406 | -4.9147859 | 3.2248731  |
| H | -2.5040832 | -5.5480233 | 1.8536745  |
| H | -0.1916367 | -6.2887032 | 0.7947963  |
| H | 0.6401521  | -5.5528514 | 2.1751736  |

|   |            |            |            |
|---|------------|------------|------------|
| H | 1.0462582  | -5.0435602 | 0.5281232  |
| C | -1.1311778 | -1.5141806 | 3.4501709  |
| C | -3.0643699 | -1.0578160 | 2.0530786  |
| C | -3.8782488 | -1.1224332 | 3.1858324  |
| C | -3.7473324 | -0.7712318 | 0.7214815  |
| C | -3.3562728 | -1.3652348 | 4.4560136  |
| H | -4.9498445 | -0.9690313 | 3.0698498  |
| C | -1.9801463 | -1.5454386 | 4.5630636  |
| C | -4.2510869 | -1.4271414 | 5.6800730  |
| H | -1.5551712 | -1.7237733 | 5.5497377  |
| C | 0.3532128  | -1.7363667 | 3.6958937  |
| C | -4.5043184 | 0.5672696  | 0.7276839  |
| C | -4.6698798 | -1.9364440 | 0.3233835  |
| H | -2.9700661 | -0.6842631 | -0.0453900 |
| H | -4.1045674 | -2.8693496 | 0.2467755  |
| H | -5.1440041 | -1.7436798 | -0.6454609 |
| H | -5.4629249 | -2.0711630 | 1.0688901  |
| H | -5.2949876 | 0.5768055  | 1.4870590  |
| H | -4.9740445 | 0.7373675  | -0.2484087 |
| H | -3.8247102 | 1.4006773  | 0.9241171  |
| C | -5.2522616 | -2.5922930 | 5.5815670  |
| C | -4.9848587 | -0.0944814 | 5.9136160  |
| H | -3.6014901 | -1.6121670 | 6.5465321  |
| H | -4.2743742 | 0.7317419  | 6.0133216  |
| H | -5.6473096 | 0.1353246  | 5.0714479  |
| H | -5.5967555 | -0.1418071 | 6.8227511  |
| H | -4.7299690 | -3.5445395 | 5.4439034  |
| H | -5.8659384 | -2.6574150 | 6.4884550  |
| H | -5.9242011 | -2.4522439 | 4.7270881  |
| C | 0.9837122  | -0.5037321 | 4.3628438  |
| C | 0.6337515  | -3.0014150 | 4.5226764  |
| H | 0.8350275  | -1.8561991 | 2.7167329  |
| H | 0.2177840  | -2.9205636 | 5.5335595  |
| H | 1.7127450  | -3.1527073 | 4.6193048  |
| H | 0.2033538  | -3.8888192 | 4.0508152  |
| H | 0.8999532  | 0.3698453  | 3.7108439  |
| H | 2.0478248  | -0.6734625 | 4.5611030  |
| H | 0.4858447  | -0.2817038 | 5.3150129  |

### Diso

196

Energy =

|    |            |            |            |
|----|------------|------------|------------|
| Si | 0.2767781  | 0.8562324  | -2.2536882 |
| Si | -0.8109413 | 1.3993775  | -0.1520442 |
| Si | 1.1628840  | -0.3171277 | -0.2727468 |
| Si | 1.7225036  | 2.0814069  | -0.9595608 |
| Si | 1.1869041  | 1.6369384  | 1.2239541  |
| C  | 3.3302760  | 2.9919537  | -1.4609312 |
| C  | 2.5888285  | -1.5776846 | -0.5353213 |
| Si | -1.0346927 | -0.8553584 | 0.4504958  |
| C  | -1.7451122 | -1.1187864 | 2.2335844  |
| C  | -1.7334874 | -2.3626994 | -0.5352809 |
| C  | -2.2469120 | 2.6594934  | 0.0677601  |
| C  | 2.5141118  | -2.5132036 | -1.6056443 |
| C  | 3.7292634  | -1.6268378 | 0.3101667  |
| C  | 3.5593804  | -3.4165818 | -1.8187372 |
| C  | 1.3487284  | -2.5635534 | -2.5871791 |
| C  | 4.6897318  | -3.4504047 | -1.0041441 |
| H  | 3.4823341  | -4.1143745 | -2.6502356 |
| C  | 4.7488553  | -2.5512853 | 0.0572320  |
| C  | 5.8194832  | -4.4309006 | -1.2601408 |

|   |            |            |            |
|---|------------|------------|------------|
| H | 5.6205694  | -2.5741357 | 0.7083653  |
| C | 3.9022727  | -0.6796552 | 1.4878923  |
| C | 1.7605004  | -1.9229798 | -3.9218960 |
| C | 0.8088208  | -3.9804405 | -2.8357440 |
| H | 0.5294162  | -1.9665034 | -2.1697318 |
| H | 2.0158995  | -0.8706924 | -3.7803807 |
| H | 0.9374105  | -1.9712516 | -4.6439360 |
| H | 2.6268953  | -2.4468361 | -4.3458022 |
| H | 1.5382929  | -4.6041548 | -3.3673826 |
| H | -0.0930741 | -3.9202291 | -3.4539085 |
| H | 0.5404424  | -4.4811484 | -1.9040755 |
| C | 6.4897051  | -4.1678821 | -2.6208827 |
| C | 5.3368822  | -5.8889475 | -1.1606213 |
| H | 6.5721468  | -4.2695449 | -0.4762130 |
| H | 4.5823121  | -6.0999338 | -1.9267961 |
| H | 4.8838434  | -6.0836272 | -0.1831762 |
| H | 6.1710009  | -6.5868255 | -1.3048567 |
| H | 5.7735549  | -4.3132387 | -3.4376897 |
| H | 7.3311714  | -4.8533705 | -2.7809979 |
| H | 6.8605101  | -3.1396988 | -2.6803260 |
| C | 4.5807185  | -1.3300606 | 2.7033962  |
| C | 4.6729984  | 0.5837903  | 1.0740015  |
| H | 2.9000977  | -0.3526446 | 1.7941786  |
| H | 5.6946413  | 0.3273717  | 0.7663331  |
| H | 4.7255157  | 1.2912930  | 1.9095011  |
| H | 4.1817486  | 1.0918585  | 0.2412040  |
| H | 4.1313144  | -2.2979431 | 2.9457693  |
| H | 4.4841092  | -0.6731862 | 3.5752045  |
| H | 5.6525355  | -1.4882077 | 2.5320822  |
| C | -2.9574388 | 3.2097274  | -1.0319417 |
| C | -2.7117999 | 2.9634306  | 1.3767864  |
| C | -4.1236804 | 3.9508689  | -0.8121517 |
| C | -2.4253986 | 3.0749615  | -2.4488906 |
| C | -4.6108800 | 4.2019078  | 0.4690705  |
| H | -4.6755818 | 4.3450463  | -1.6627299 |
| C | -3.8730182 | 3.7218514  | 1.5501762  |
| C | -5.9083100 | 4.9620759  | 0.6746320  |
| H | -4.2159959 | 3.9282103  | 2.5614707  |
| C | -1.9320952 | 2.5598325  | 2.6201746  |
| C | -1.2893778 | 4.0926479  | -2.6661058 |
| C | -3.4788459 | 3.2107922  | -3.5544761 |
| H | -1.9748013 | 2.0771630  | -2.5394109 |
| H | -1.6762634 | 5.1172583  | -2.5982017 |
| H | -0.8251685 | 3.9507085  | -3.6487938 |
| H | -0.5134783 | 3.9643152  | -1.9054102 |
| H | -4.3350804 | 2.5508927  | -3.3797507 |
| H | -3.0319822 | 2.9447569  | -4.5189202 |
| H | -3.8534124 | 4.2386016  | -3.6389345 |
| C | -6.9798631 | 4.0596005  | 1.3141119  |
| C | -5.7007060 | 6.2377778  | 1.5095887  |
| H | -6.2687768 | 5.2632039  | -0.3186758 |
| H | -7.9305056 | 4.5966507  | 1.4226895  |
| H | -6.6595873 | 3.7284510  | 2.3084670  |
| H | -7.1504936 | 3.1662494  | 0.7049874  |
| H | -6.6411701 | 6.7930958  | 1.6132413  |
| H | -4.9585340 | 6.8934133  | 1.0426893  |
| H | -5.3431680 | 5.9891734  | 2.5151319  |
| C | -2.7968933 | 2.1581484  | 3.8222034  |
| C | -0.9840144 | 3.7118325  | 3.0029768  |
| H | -1.3129108 | 1.6928694  | 2.3607420  |
| H | -3.3485875 | 3.0122478  | 4.2345170  |
| H | -2.1537250 | 1.7658581  | 4.6171302  |
| H | -3.5124751 | 1.3759045  | 3.5581800  |

|   |            |            |            |
|---|------------|------------|------------|
| H | -0.3243862 | 3.9628781  | 2.1666379  |
| H | -0.3546635 | 3.4305955  | 3.8548596  |
| H | -1.5647212 | 4.6042503  | 3.2706381  |
| C | 4.3629761  | 2.3814011  | -2.2072828 |
| C | 3.5210069  | 4.3110956  | -0.9868357 |
| C | 5.5656166  | 3.0650580  | -2.4111652 |
| C | 4.1508787  | 1.0212496  | -2.8543041 |
| C | 5.7750319  | 4.3519624  | -1.9120886 |
| H | 6.3666052  | 2.5884276  | -2.9746340 |
| C | 4.7328668  | 4.9670443  | -1.2130215 |
| C | 7.0999222  | 5.0602482  | -2.1328285 |
| H | 4.8679052  | 5.9793052  | -0.8338593 |
| C | 2.4104056  | 5.0367947  | -0.2384993 |
| C | 5.3520038  | 0.0730491  | -2.7397389 |
| C | 3.7504893  | 1.2273589  | -4.3279627 |
| H | 3.3057547  | 0.5376649  | -2.3444917 |
| H | 2.8056990  | 1.7760102  | -4.3947145 |
| H | 3.6285227  | 0.2656481  | -4.8375121 |
| H | 4.5246507  | 1.8010836  | -4.8523290 |
| H | 6.2091373  | 0.4349256  | -3.3211611 |
| H | 5.0780400  | -0.9150502 | -3.1229446 |
| H | 5.6644009  | -0.0456202 | -1.6992394 |
| C | 6.9250958  | 6.3522386  | -2.9509145 |
| C | 7.8095772  | 5.3520450  | -0.7983053 |
| H | 7.7378570  | 4.3785213  | -2.7118121 |
| H | 6.2941724  | 7.0689279  | -2.4129941 |
| H | 6.4478677  | 6.1426780  | -3.9136022 |
| H | 7.8951085  | 6.8292991  | -3.1383142 |
| H | 7.9613721  | 4.4300300  | -0.2281793 |
| H | 8.7859369  | 5.8221789  | -0.9697646 |
| H | 7.2093634  | 6.0314419  | -0.1824506 |
| C | 2.0203143  | 6.3546618  | -0.9272189 |
| C | 2.7702449  | 5.2500957  | 1.2398162  |
| H | 1.5218906  | 4.3869558  | -0.2572842 |
| H | 1.1700315  | 6.8152591  | -0.4109230 |
| H | 1.7374113  | 6.1796305  | -1.9703921 |
| H | 2.8508536  | 7.0706831  | -0.9165374 |
| H | 2.9297744  | 4.2854916  | 1.7319477  |
| H | 3.6846662  | 5.8485164  | 1.3356063  |
| H | 1.9600710  | 5.7717250  | 1.7631037  |
| C | -2.5222929 | -2.2743343 | -1.7122279 |
| C | -1.4562763 | -3.6581766 | -0.0274659 |
| C | -3.0462992 | -3.4329098 | -2.2929965 |
| C | -2.8307155 | -0.9589860 | -2.4151015 |
| C | -2.8120656 | -4.7028213 | -1.7679029 |
| H | -3.6577738 | -3.3344388 | -3.1882423 |
| C | -2.0022627 | -4.7912557 | -0.6398185 |
| C | -3.3928135 | -5.9470314 | -2.4137043 |
| H | -1.7871551 | -5.7756769 | -0.2255664 |
| C | -0.5831927 | -3.8893584 | 1.1988053  |
| C | -2.2878323 | -0.9734757 | -3.8548861 |
| C | -4.3340434 | -0.6331895 | -2.4404891 |
| H | -2.3120164 | -0.1594172 | -1.8705183 |
| H | -1.2204212 | -1.2032315 | -3.8674796 |
| H | -2.4180336 | 0.0101725  | -4.3186013 |
| H | -2.8211376 | -1.7160270 | -4.4626868 |
| H | -4.8958863 | -1.4245514 | -2.9514197 |
| H | -4.5037337 | 0.3038071  | -2.9811858 |
| H | -4.7442191 | -0.5209406 | -1.4352451 |
| C | -2.8242139 | -6.1595302 | -3.8284572 |
| C | -4.9307843 | -5.9040740 | -2.4418730 |
| H | -3.0895666 | -6.8035569 | -1.7960324 |
| H | -5.2834107 | -5.0648860 | -3.0521133 |



|   |            |            |            |
|---|------------|------------|------------|
| H | -5.3358117 | -5.7768931 | -1.4328221 |
| H | -5.3389330 | -6.8282254 | -2.8693213 |
| H | -1.7317513 | -6.2223961 | -3.8038425 |
| H | -3.2181955 | -7.0817085 | -4.2733767 |
| H | -3.0963376 | -5.3234403 | -4.4826331 |
| C | -1.4115359 | -4.4841395 | 2.3511509  |
| C | 0.6444989  | -4.7646172 | 0.8930144  |
| H | -0.1995275 | -2.9164935 | 1.5251776  |
| H | -2.2535797 | -3.8337073 | 2.6019041  |
| H | -0.7953228 | -4.6079616 | 3.2483193  |
| H | -1.8049196 | -5.4684280 | 2.0696410  |
| H | 0.3487804  | -5.7427479 | 0.4959203  |
| H | 1.2202965  | -4.9364652 | 1.8103423  |
| H | 1.3044994  | -4.2804738 | 0.1689814  |
| C | -1.0008123 | -1.2436072 | 3.4325654  |
| C | -3.1623969 | -1.1910657 | 2.3370304  |
| C | -3.7757791 | -1.4337683 | 3.5680223  |
| C | -4.0854914 | -1.0265600 | 1.1369111  |
| C | -3.0405189 | -1.5866948 | 4.7421330  |
| H | -4.8618725 | -1.4970011 | 3.6062873  |
| C | -1.6578485 | -1.4750914 | 4.6476455  |
| C | -3.7183344 | -1.8391716 | 6.0756161  |
| H | -1.0657137 | -1.5725872 | 5.5566805  |
| C | 0.5145659  | -1.1275540 | 3.4972103  |
| C | -5.1003566 | 0.1124343  | 1.3312887  |
| C | -4.8037724 | -2.3487644 | 0.8153515  |
| H | -3.4688560 | -0.7525716 | 0.2732950  |
| H | -4.0857501 | -3.1526633 | 0.6350419  |
| H | -5.4305711 | -2.2425421 | -0.0768121 |
| H | -5.4493476 | -2.6411497 | 1.6525985  |
| H | -5.7516490 | -0.0769289 | 2.1927494  |
| H | -5.7396992 | 0.2021108  | 0.4448985  |
| H | -4.5971077 | 1.0700340  | 1.4804546  |
| C | -4.5147433 | -3.1558997 | 6.0634305  |
| C | -4.6194406 | -0.6572226 | 6.4770587  |
| H | -2.9246866 | -1.9305597 | 6.8298572  |
| H | -4.0475735 | 0.2754358  | 6.5093431  |
| H | -5.4300613 | -0.5264735 | 5.7511722  |
| H | -5.0701924 | -0.8268134 | 7.4627410  |
| H | -3.8677611 | -4.0003623 | 5.8049274  |
| H | -4.9663187 | -3.3483917 | 7.0445226  |
| H | -5.3210157 | -3.1128918 | 5.3223923  |
| C | 0.9315005  | 0.0522376  | 4.3931618  |
| C | 1.1804004  | -2.4176603 | 4.0071311  |
| H | 0.8780887  | -0.9201775 | 2.4827999  |
| H | 0.7880694  | -2.6951116 | 4.9925589  |
| H | 2.2599092  | -2.2696962 | 4.1049399  |
| H | 1.0125476  | -3.2563873 | 3.3283254  |
| H | 0.4653607  | 0.9813919  | 4.0580631  |
| H | 2.0165095  | 0.1959205  | 4.3497304  |
| H | 0.6478039  | -0.1356741 | 5.4367035  |

**3opt**

131

Energy =

|    |            |            |            |
|----|------------|------------|------------|
| Si | -1.2483979 | -0.3368232 | 1.6603357  |
| Si | -2.3218134 | -0.4328008 | -0.3840070 |
| Si | -0.6990581 | -0.5498682 | -2.0239728 |
| Si | 0.0328871  | -1.5964117 | 0.0364939  |
| Si | -0.2909471 | 0.9910891  | -0.1586226 |
| Si | 1.8071035  | -0.1093416 | 0.0429361  |
| Si | -5.0497956 | -0.3567234 | -1.9746386 |
| Si | -0.5892787 | -4.4161646 | -1.1109772 |
| Si | -1.2385729 | 3.6073396  | -1.7076954 |
| Si | 4.5269164  | -0.0427062 | 1.8026941  |
| Si | 3.2033807  | 1.2425397  | -2.3308372 |
| N  | -4.0090473 | 0.1224153  | -0.6444611 |
| N  | -0.0115914 | -3.3754341 | 0.1856022  |
| N  | -0.6826605 | 2.7289620  | -0.2834035 |
| N  | 2.8378362  | 0.2680602  | 1.4320339  |
| N  | 2.8865595  | -0.2119547 | -1.3864270 |
| C  | -4.5922207 | 0.8445830  | 0.4425054  |
| C  | -4.7371775 | 0.2555309  | 1.7089853  |
| H  | -4.4359924 | -0.7778685 | 1.8427691  |
| C  | -5.2349731 | 0.9957019  | 2.7808265  |
| H  | -5.3209668 | 0.5261816  | 3.7573083  |
| C  | -5.6103252 | 2.3289343  | 2.6090875  |
| H  | -5.9916304 | 2.9047640  | 3.4481429  |
| C  | -5.4754891 | 2.9203622  | 1.3516690  |
| H  | -5.7426807 | 3.9641492  | 1.2070309  |
| C  | -4.9641313 | 2.1884754  | 0.2819912  |
| H  | -4.8198289 | 2.6572029  | -0.6853151 |
| C  | -4.0503967 | -1.1793214 | -3.3311973 |
| H  | -3.2767884 | -0.5148153 | -3.7294694 |
| H  | -4.7294353 | -1.4542645 | -4.1505319 |
| H  | -3.5469573 | -2.0882057 | -2.9885352 |
| C  | -5.9753567 | 1.1115419  | -2.7202611 |
| H  | -6.6387833 | 1.5904591  | -1.9918563 |
| H  | -6.5938663 | 0.7675939  | -3.5603027 |
| H  | -5.2848645 | 1.8712634  | -3.1038525 |
| C  | -6.3371581 | -1.5657758 | -1.3090280 |
| H  | -5.8528605 | -2.4773807 | -0.9390087 |
| H  | -7.0614192 | -1.8551583 | -2.0813929 |
| H  | -6.8937392 | -1.1222318 | -0.4744621 |
| C  | 0.2142723  | -3.8982818 | 1.4812512  |
| C  | 1.3458869  | -3.5071997 | 2.2164822  |
| H  | 2.0269114  | -2.7884906 | 1.7707450  |
| C  | 1.5920189  | -4.0187435 | 3.4873111  |
| H  | 2.4806444  | -3.7000441 | 4.0267164  |
| C  | 0.7138560  | -4.9391080 | 4.0636281  |
| H  | 0.9056444  | -5.3386372 | 5.0556345  |
| C  | -0.4221486 | -5.3252982 | 3.3505943  |
| H  | -1.1303413 | -6.0233245 | 3.7912743  |
| C  | -0.6750707 | -4.8063539 | 2.0823579  |
| H  | -1.5815893 | -5.0847209 | 1.5536139  |
| C  | 0.0812911  | -6.1588403 | -0.8207991 |
| H  | 1.1775555  | -6.1357690 | -0.8000956 |
| H  | -0.2238119 | -6.8095072 | -1.6509130 |
| H  | -0.2611741 | -6.6163174 | 0.1119617  |
| C  | -2.4775354 | -4.4504432 | -1.1674220 |
| H  | -2.9167692 | -4.9484430 | -0.2950209 |
| H  | -2.8450942 | -4.9590370 | -2.0681000 |
| H  | -2.8533256 | -3.4199334 | -1.1834720 |
| C  | 0.0540241  | -3.8633575 | -2.7814065 |
| H  | -0.4616639 | -2.9786761 | -3.1685894 |

|   |            |            |            |
|---|------------|------------|------------|
| H | -0.0876454 | -4.6857558 | -3.4973002 |
| H | 1.1223267  | -3.6315871 | -2.7398634 |
| C | -0.7859027 | 3.4933562  | 0.9264191  |
| C | 0.0283932  | 4.6183913  | 1.1243571  |
| H | 0.7986340  | 4.8429951  | 0.3920082  |
| C | -0.1553555 | 5.4451638  | 2.2334863  |
| H | 0.4788572  | 6.3191576  | 2.3629738  |
| C | -1.1405335 | 5.1465075  | 3.1760066  |
| H | -1.2843988 | 5.7886113  | 4.0412935  |
| C | -1.9292637 | 4.0064539  | 3.0029211  |
| H | -2.6976441 | 3.7551669  | 3.7290284  |
| C | -1.7569425 | 3.1874601  | 1.8903238  |
| H | -2.3863378 | 2.3157812  | 1.7473125  |
| C | -2.0715537 | 2.4816070  | -2.9546661 |
| H | -1.3800346 | 1.7894875  | -3.4455988 |
| H | -2.5456878 | 3.1029631  | -3.7275526 |
| H | -2.8457147 | 1.8766462  | -2.4711607 |
| C | -2.5071672 | 4.8879630  | -1.1449881 |
| H | -3.2806595 | 4.4296707  | -0.5200361 |
| H | -2.9937081 | 5.3365935  | -2.0210577 |
| H | -2.0495771 | 5.6931148  | -0.5608858 |
| C | 0.1472465  | 4.5500174  | -2.5779017 |
| H | 0.6063358  | 5.2935022  | -1.9161836 |
| H | -0.2534673 | 5.0834090  | -3.4507243 |
| H | 0.9347920  | 3.8786761  | -2.9295529 |
| C | 2.1037286  | 0.7225827  | 2.5944417  |
| C | 1.6522816  | -0.1754180 | 3.5668149  |
| H | 1.7985781  | -1.2377778 | 3.4167895  |
| C | 0.9784636  | 0.2872619  | 4.6967839  |
| H | 0.6134766  | -0.4276597 | 5.4290961  |
| C | 0.7407147  | 1.6501458  | 4.8618548  |
| H | 0.1979380  | 2.0108938  | 5.7315040  |
| C | 1.1737131  | 2.5488644  | 3.8857834  |
| H | 0.9663290  | 3.6087473  | 3.9865406  |
| C | 1.8493422  | 2.0884221  | 2.7591971  |
| H | 2.1815562  | 2.7800786  | 1.9919550  |
| C | 5.6307029  | -0.0869622 | 0.2877066  |
| H | 5.3619662  | -0.8681959 | -0.4272338 |
| H | 6.6606164  | -0.2711646 | 0.6230298  |
| H | 5.6176307  | 0.8741248  | -0.2336310 |
| C | 4.7563280  | -1.6662227 | 2.7427674  |
| H | 4.1784180  | -1.6696844 | 3.6734427  |
| H | 5.8135279  | -1.8063584 | 3.0052729  |
| H | 4.4469678  | -2.5334337 | 2.1484891  |
| C | 5.1487456  | 1.3451723  | 2.9195734  |
| H | 5.0350371  | 2.3221973  | 2.4348224  |
| H | 6.2140329  | 1.2008097  | 3.1434345  |
| H | 4.6031561  | 1.3818814  | 3.8681296  |
| C | 3.1996082  | -1.5043918 | -1.8470281 |
| C | 3.3709815  | -1.8088283 | -3.2107664 |
| H | 3.2087288  | -1.0369928 | -3.9551296 |
| C | 3.7065133  | -3.0968452 | -3.6225652 |
| H | 3.8235672  | -3.2976339 | -4.6847986 |
| C | 3.8557455  | -4.1309351 | -2.6964110 |
| H | 4.0967209  | -5.1376919 | -3.0250381 |
| C | 3.6669571  | -3.8500972 | -1.3416389 |
| H | 3.7633742  | -4.6363806 | -0.5974454 |
| C | 3.3573049  | -2.5597450 | -0.9264689 |
| H | 3.2369652  | -2.3499133 | 0.1322962  |
| C | 2.0092799  | 1.4745150  | -3.7676361 |
| H | 2.1485641  | 0.7197086  | -4.5494246 |
| H | 2.1545266  | 2.4599090  | -4.2296692 |
| H | 0.9716713  | 1.3889755  | -3.4271808 |

|   |           |           |            |
|---|-----------|-----------|------------|
| C | 4.9477378 | 1.2223427 | -3.0591819 |
| H | 5.7209240 | 1.3374012 | -2.2937523 |
| H | 5.0482247 | 2.0552648 | -3.7678012 |
| H | 5.1573911 | 0.2956920 | -3.6033936 |
| C | 3.0549831 | 2.6984281 | -1.1492216 |
| H | 2.0344707 | 2.8132436 | -0.7669093 |
| H | 3.3229756 | 3.6262164 | -1.6712216 |
| H | 3.7244819 | 2.5807288 | -0.2907448 |

### 3iso

131

Energy =

|    |            |            |            |
|----|------------|------------|------------|
| Si | -1.4612356 | 0.4734213  | 0.9953788  |
| Si | -3.2529219 | 1.0497831  | -0.5337015 |
| Si | -1.3556954 | -0.2284033 | -1.6484984 |
| Si | -0.1585468 | -1.2718399 | 0.0766191  |
| Si | -0.0239211 | 1.4446817  | -0.6507749 |
| Si | 1.7627748  | 0.0925447  | -0.0115655 |
| Si | -6.1575399 | 0.4725179  | -1.0073270 |
| Si | -0.5693219 | -4.0603915 | -1.1022105 |
| Si | -0.5751358 | 3.7699231  | -2.7066679 |
| Si | 4.2347193  | 0.1593938  | 2.0922090  |
| Si | 3.5320574  | 0.8201270  | -2.3496409 |
| N  | -4.6934221 | 0.0266073  | -0.1370425 |
| N  | -0.2698672 | -3.0334285 | 0.3184858  |
| N  | -0.1255829 | 3.1525407  | -1.1114294 |
| N  | 2.6309988  | 0.5298784  | 1.4721973  |
| N  | 2.9930950  | -0.4092624 | -1.2026019 |
| C  | -4.7383050 | -0.9394188 | 0.8958326  |
| C  | -3.7636865 | -1.9458167 | 0.9893693  |
| H  | -2.9880646 | -1.9871958 | 0.2327195  |
| C  | -3.7894336 | -2.8696365 | 2.0300485  |
| H  | -3.0122919 | -3.6249219 | 2.0881966  |
| C  | -4.7913737 | -2.8221368 | 3.0022953  |
| H  | -4.8012988 | -3.5408283 | 3.8174553  |
| C  | -5.7670407 | -1.8275603 | 2.9204070  |
| H  | -6.5474495 | -1.7632619 | 3.6757674  |
| C  | -5.7377753 | -0.8942432 | 1.8853944  |
| H  | -6.4788535 | -0.0999550 | 1.8501479  |
| C  | -5.7233138 | 0.8931723  | -2.7929443 |
| H  | -5.1425268 | 1.8185376  | -2.8595570 |
| H  | -6.6413841 | 1.0154004  | -3.3853747 |
| H  | -5.1257328 | 0.0944036  | -3.2471637 |
| C  | -7.0289139 | 1.9681352  | -0.2500788 |
| H  | -7.3934801 | 1.7646038  | 0.7636287  |
| H  | -7.8866442 | 2.2825282  | -0.8595744 |
| H  | -6.3272330 | 2.8087322  | -0.1907547 |
| C  | -7.3329393 | -1.0041242 | -1.0398904 |
| H  | -6.8279718 | -1.8820721 | -1.4602913 |
| H  | -8.2012503 | -0.7779320 | -1.6725764 |
| H  | -7.6983418 | -1.2791464 | -0.0457445 |
| C  | -0.0534687 | -3.5665307 | 1.6037516  |
| C  | 0.7900452  | -2.9107834 | 2.5188869  |
| H  | 1.2776040  | -1.9893290 | 2.2075728  |
| C  | 1.0074828  | -3.4197291 | 3.7951773  |
| H  | 1.6698204  | -2.8874844 | 4.4728324  |
| C  | 0.3922036  | -4.6052983 | 4.2024665  |
| H  | 0.5606615  | -5.0020967 | 5.1994639  |
| C  | -0.4535171 | -5.2634078 | 3.3079953  |

|   |            |            |            |
|---|------------|------------|------------|
| H | -0.9591794 | -6.1781128 | 3.6085211  |
| C | -0.6806331 | -4.7514072 | 2.0330031  |
| H | -1.3699557 | -5.2590881 | 1.3664974  |
| C | 0.1293417  | -5.7946616 | -0.7974232 |
| H | 1.0339576  | -5.7622100 | -0.1825021 |
| H | 0.4049048  | -6.2239176 | -1.7693181 |
| H | -0.5791607 | -6.4790110 | -0.3204466 |
| C | -2.4062694 | -4.1899079 | -1.4885249 |
| H | -2.9907147 | -4.5483483 | -0.6337784 |
| H | -2.5655866 | -4.8835081 | -2.3252136 |
| H | -2.8082303 | -3.2130414 | -1.7804168 |
| C | 0.3243052  | -3.4104857 | -2.6181612 |
| H | -0.0189728 | -2.4188682 | -2.9237968 |
| H | 0.1366537  | -4.1093826 | -3.4457826 |
| H | 1.4047588  | -3.3679782 | -2.4545183 |
| C | -0.1761440 | 4.1682552  | -0.0976336 |
| C | 0.8242487  | 5.1475680  | -0.0227386 |
| H | 1.6847328  | 5.0708414  | -0.6803157 |
| C | 0.7121927  | 6.2103164  | 0.8764588  |
| H | 1.4944284  | 6.9647462  | 0.9163123  |
| C | -0.3946432 | 6.3027928  | 1.7206568  |
| H | -0.4845729 | 7.1315156  | 2.4182882  |
| C | -1.3787505 | 5.3111186  | 1.6704273  |
| H | -2.2419787 | 5.3663448  | 2.3288849  |
| C | -1.2715559 | 4.2526874  | 0.7730178  |
| H | -2.0427065 | 3.4896791  | 0.7075383  |
| C | -1.2682193 | 2.4652132  | -3.8600274 |
| H | -0.5766677 | 1.6497418  | -4.0853054 |
| H | -1.5258708 | 2.9645359  | -4.8055521 |
| H | -2.1783491 | 2.0254324  | -3.4393380 |
| C | -1.9135361 | 5.0738513  | -2.4706628 |
| H | -2.7774407 | 4.6253524  | -1.9657030 |
| H | -2.2461860 | 5.4551509  | -3.4450634 |
| H | -1.5729173 | 5.9239174  | -1.8701660 |
| C | 0.9113467  | 4.5792256  | -3.5515478 |
| H | 1.2874190  | 5.4353227  | -2.9800866 |
| H | 0.6306883  | 4.9425871  | -4.5492129 |
| H | 1.7343245  | 3.8670537  | -3.6738973 |
| C | 1.8419369  | 1.2911744  | 2.4157490  |
| C | 1.1113327  | 0.6667830  | 3.4326726  |
| H | 1.1021109  | -0.4143522 | 3.4975762  |
| C | 0.3714309  | 1.4263208  | 4.3396661  |
| H | -0.2074946 | 0.9231225  | 5.1094239  |
| C | 0.3549725  | 2.8167241  | 4.2415002  |
| H | -0.2324929 | 3.4084129  | 4.9384061  |
| C | 1.0810529  | 3.4445847  | 3.2284656  |
| H | 1.0590928  | 4.5240868  | 3.1259652  |
| C | 1.8138776  | 2.6866494  | 2.3199944  |
| H | 2.3677015  | 3.1675426  | 1.5205244  |
| C | 5.5024498  | -0.2162141 | 0.7593957  |
| H | 5.2808863  | -1.1223975 | 0.1909908  |
| H | 6.4728920  | -0.3570966 | 1.2551161  |
| H | 5.6062454  | 0.6166850  | 0.0575688  |
| C | 4.1886744  | -1.2887281 | 3.3018716  |
| H | 3.5077305  | -1.0780282 | 4.1343705  |
| H | 5.1861558  | -1.4679235 | 3.7246528  |
| H | 3.8586545  | -2.2163962 | 2.8224700  |
| C | 4.8668126  | 1.6613035  | 3.0447646  |
| H | 4.9159825  | 2.5494082  | 2.4036257  |
| H | 5.8790736  | 1.4606361  | 3.4204430  |
| H | 4.2291017  | 1.9067586  | 3.9000481  |
| C | 3.3133201  | -1.7707663 | -1.3274648 |
| C | 3.8096973  | -2.3252345 | -2.5230184 |

|   |           |            |            |
|---|-----------|------------|------------|
| H | 3.9207372 | -1.6972082 | -3.4006485 |
| C | 4.1237457 | -3.6801766 | -2.6111482 |
| H | 4.4941427 | -4.0752776 | -3.5540542 |
| C | 3.9383946 | -4.5320719 | -1.5214431 |
| H | 4.1672065 | -5.5907029 | -1.6002704 |
| C | 3.4417369 | -3.9970431 | -0.3305404 |
| H | 3.2828272 | -4.6328778 | 0.5363923  |
| C | 3.1461966 | -2.6430306 | -0.2333506 |
| H | 2.7725818 | -2.2440327 | 0.7049533  |
| C | 2.3927897 | 0.8518762  | -3.8430808 |
| H | 2.4255510 | -0.0971823 | -4.3910188 |
| H | 2.6438986 | 1.6581234  | -4.5432656 |
| H | 1.3617169 | 0.9953019  | -3.5009028 |
| C | 5.3143075 | 0.4996142  | -2.9124485 |
| H | 5.8645977 | -0.1194802 | -2.1972693 |
| H | 5.8437638 | 1.4564942  | -3.0056119 |
| H | 5.3609209 | 0.0027631  | -3.8877600 |
| C | 3.4949048 | 2.4837200  | -1.4728205 |
| H | 2.4747113 | 2.8084576  | -1.2444246 |
| H | 3.9515747 | 3.2430270  | -2.1216893 |
| H | 4.0614530 | 2.4526324  | -0.5357379 |

Cartesian coordinates in units of Å

**3`**

|    |           |           |           |
|----|-----------|-----------|-----------|
| Si | 0.000000  | 0.000000  | 0.000000  |
| Si | 0.000000  | 0.000000  | 3.727252  |
| Si | 1.353138  | 0.000000  | 1.863529  |
| Si | -0.912893 | -1.300723 | 1.837220  |
| Si | -0.899282 | 1.311574  | 1.890427  |
| Si | -2.861873 | 0.014710  | 1.861957  |
| N  | -4.004559 | -0.223869 | 3.184445  |
| H  | -4.703295 | 0.508697  | 3.295567  |
| H  | -3.567671 | -0.406782 | 4.084705  |
| N  | -3.997225 | 0.270595  | 0.536421  |
| H  | -4.706226 | -0.451702 | 0.422846  |
| H  | -3.555232 | 0.447747  | -0.362515 |
| N  | -0.798355 | -3.080270 | 1.770839  |
| H  | -0.725823 | -3.521752 | 2.685295  |
| H  | -0.021745 | -3.410232 | 1.202060  |
| N  | -0.769294 | 3.089868  | 1.956117  |
| H  | -0.694313 | 3.530426  | 1.041490  |
| H  | 0.010319  | 3.413767  | 2.524190  |
| N  | 3.102293  | 0.015813  | 1.863153  |
| H  | 3.662278  | 0.031597  | 2.709109  |
| H  | 3.661605  | 0.014192  | 1.016627  |

**3iso`**

|    |           |           |           |
|----|-----------|-----------|-----------|
| Si | 0.000000  | 0.000000  | 0.000000  |
| Si | 2.095110  | 0.000000  | 1.277269  |
| Si | 0.000000  | 0.000000  | 2.607072  |
| Si | -1.660730 | -1.032453 | 1.321446  |
| Si | -0.948176 | 1.720245  | 1.297760  |
| Si | -3.099320 | 0.832376  | 1.262140  |
| N  | -4.298861 | 0.872937  | 2.556046  |
| H  | -4.758119 | 1.771145  | 2.696354  |
| H  | -3.966254 | 0.524605  | 3.451428  |
| N  | -4.112225 | 1.346205  | -0.085389 |
| H  | -4.961455 | 0.807182  | -0.240463 |
| H  | -3.623018 | 1.476606  | -0.966323 |
| N  | -0.388433 | 3.406221  | 1.210937  |

|   |           |           |          |
|---|-----------|-----------|----------|
| H | -0.071792 | 3.770023  | 2.107292 |
| H | 0.375397  | 3.522989  | 0.548239 |
| N | -2.153196 | -2.733007 | 1.463496 |
| H | -2.664906 | -3.092203 | 0.660016 |
| H | -1.385446 | -3.371123 | 1.660968 |
| N | 2.645764  | -1.683687 | 1.205933 |
| H | 2.054178  | -2.504135 | 1.279498 |
| H | 3.613572  | -1.898981 | 1.413162 |
